# Supplementary material for: Prediction of blood test values under different lifestyle scenarios using time-series electronic health record
Source: PubMed Central journal article supplement (PMC7083324; doi:10.1371/journal.pone.0230172), 2020-03-20

MALE Age Included

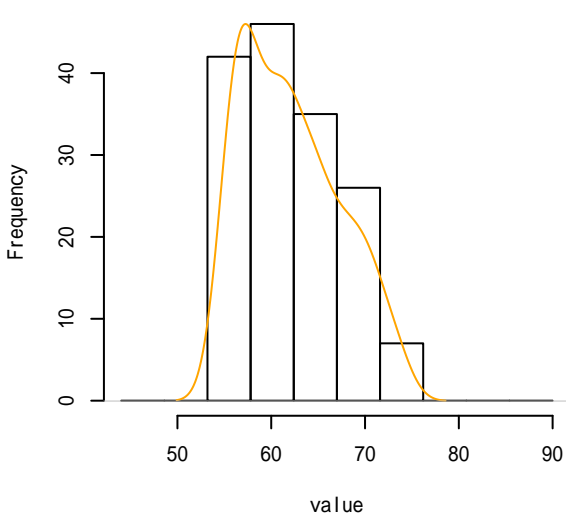

MALE Age Excluded by Med.  
p-val= 3e-08

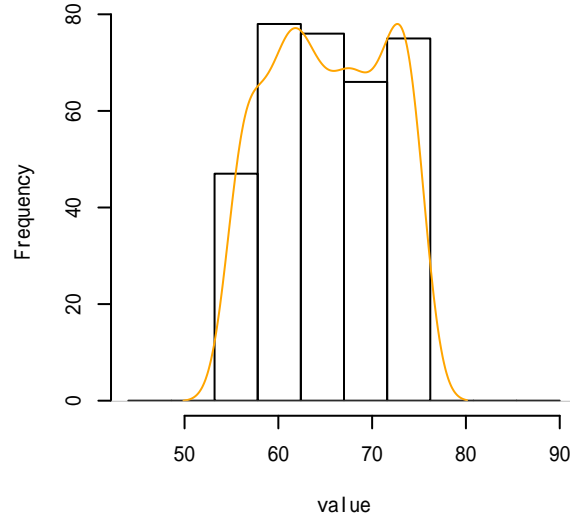

MALE Age Excluded by 1 visit  
pval= 0.00154

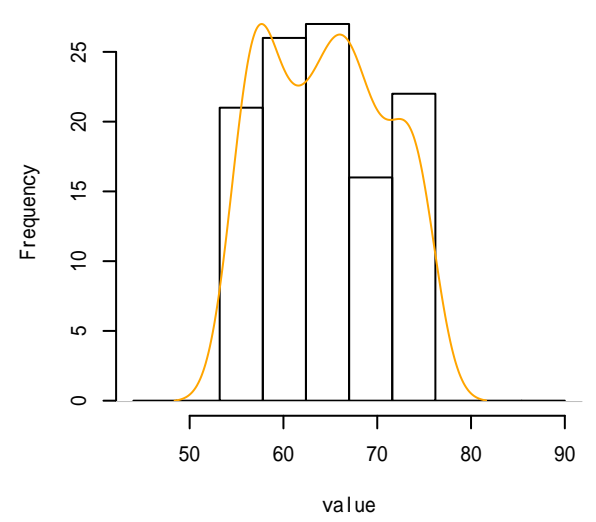

MALE Sys.BP Included

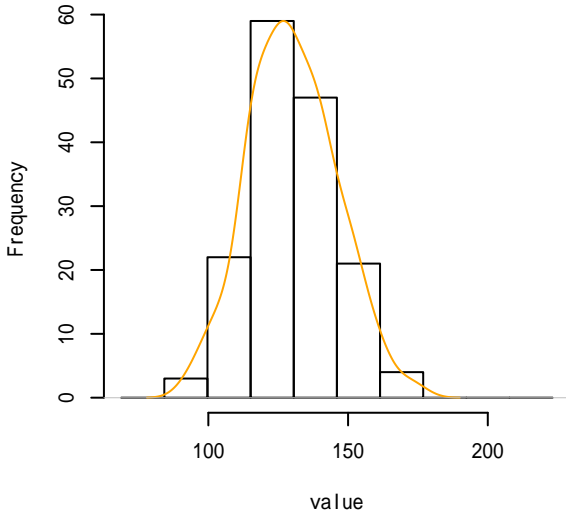

MALE Sys.BP Excluded by Med.  
p-val= 3.4e-07

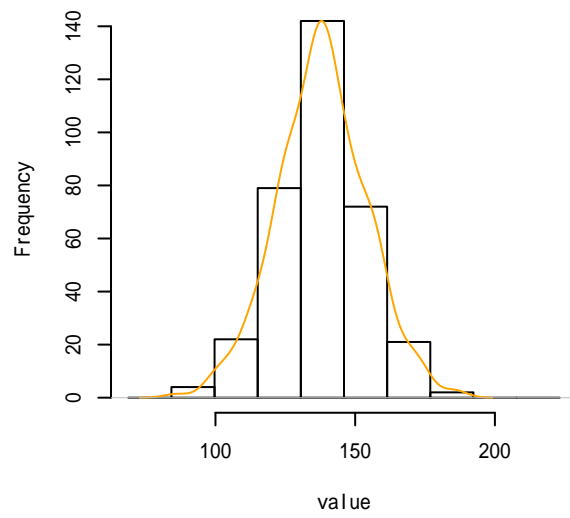

MALE Sys.BP Excluded by 1 visit  
pval= 8e-04

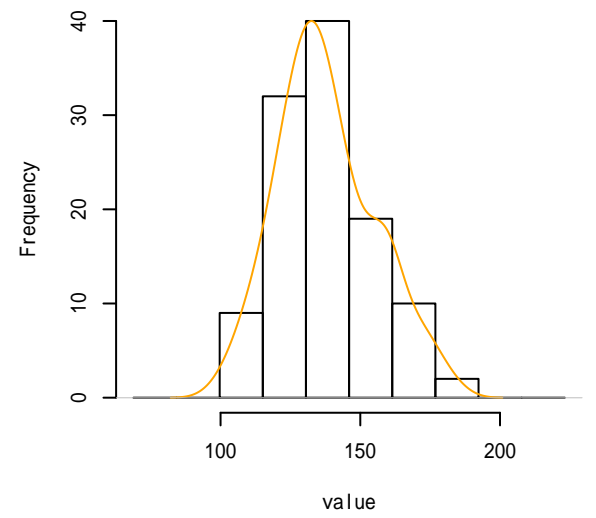

MALE Dia.BP Included

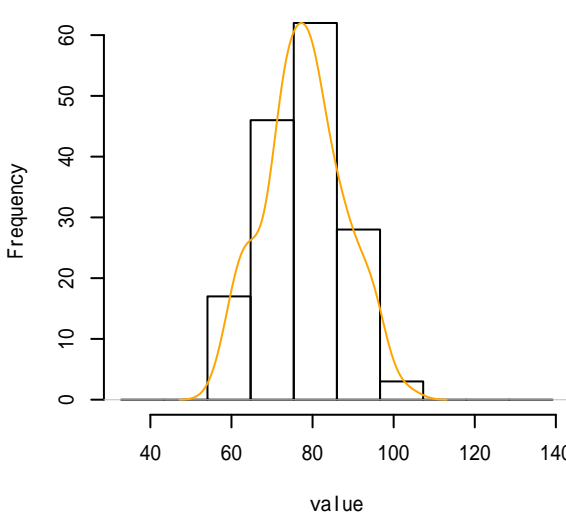

MALE Dia.BP Excluded by Med.  
p-val= 0.06882

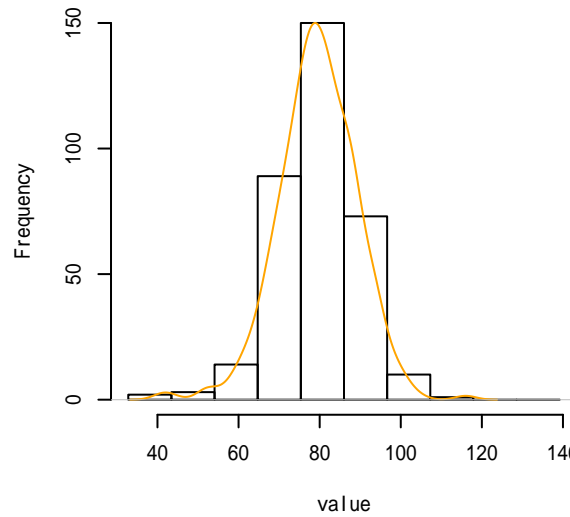

MALE Dia.BP Excluded by 1 visit  
pval= 0.0246

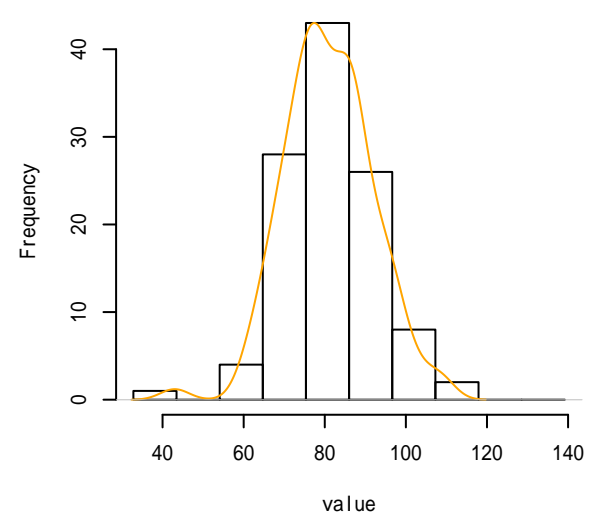

MALE PWV Included

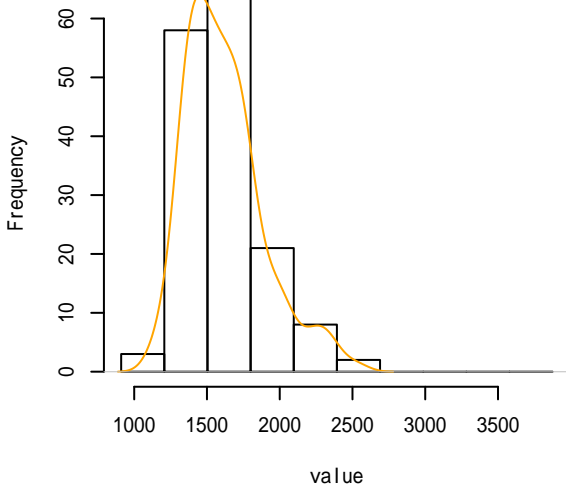

MALE PWV Excluded by Med.  
p-val= LessThan1.0E-10

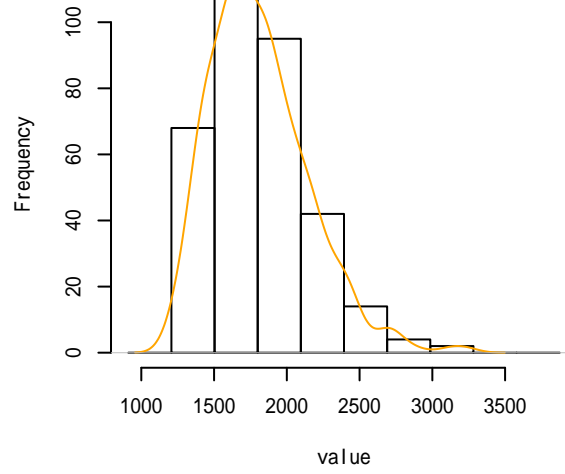

MALE PWV Excluded by 1 visit  
pval= 0.000654

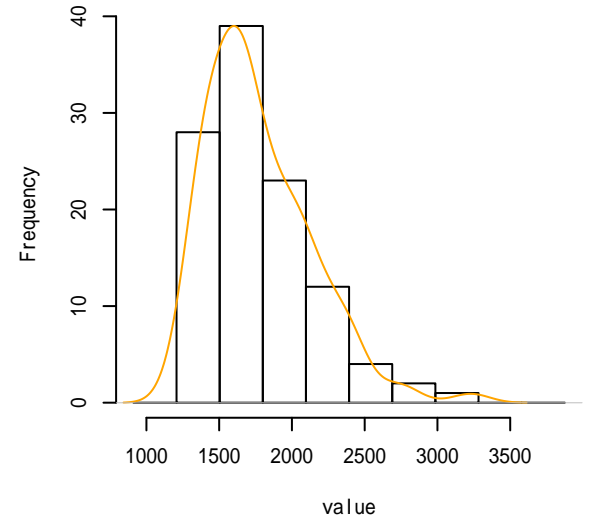

MALE ABI Included

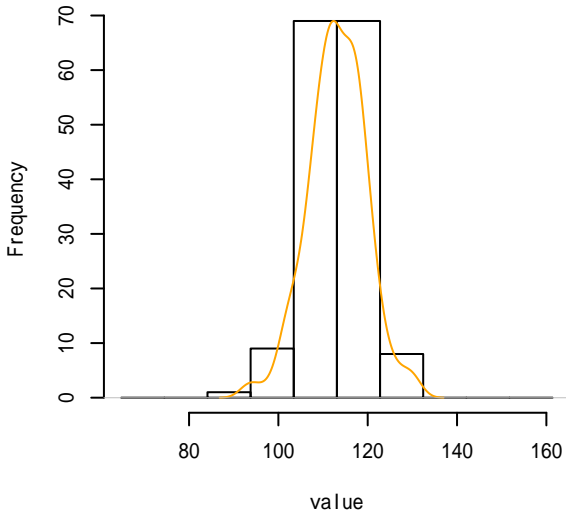

MALE ABI Excluded by Med.  
p-val= 0.7761

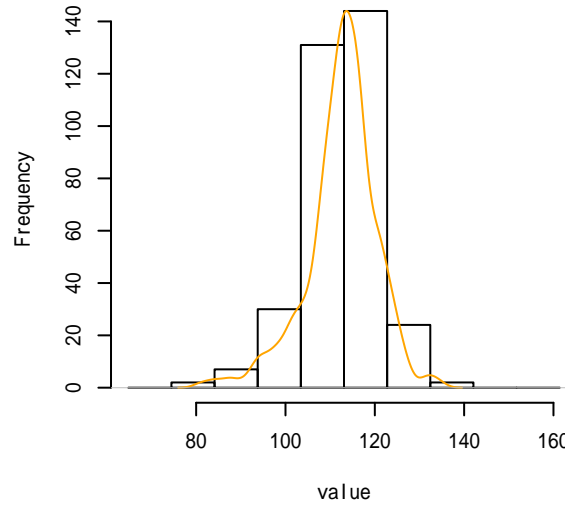

MALE ABI Excluded by 1 visit  
pval= 0.45267

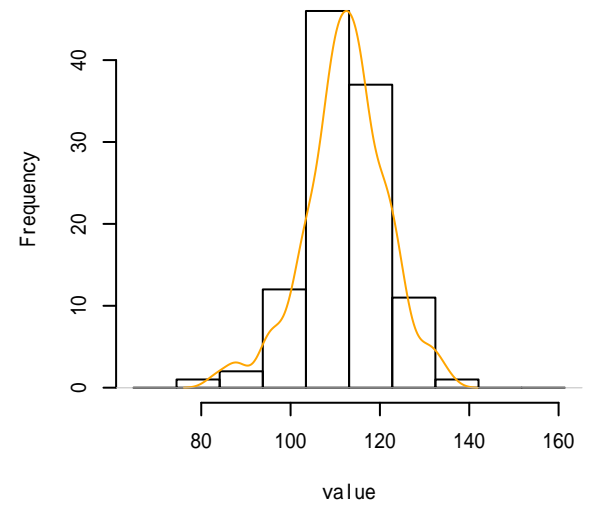

MALE BD(Acoustic) Included

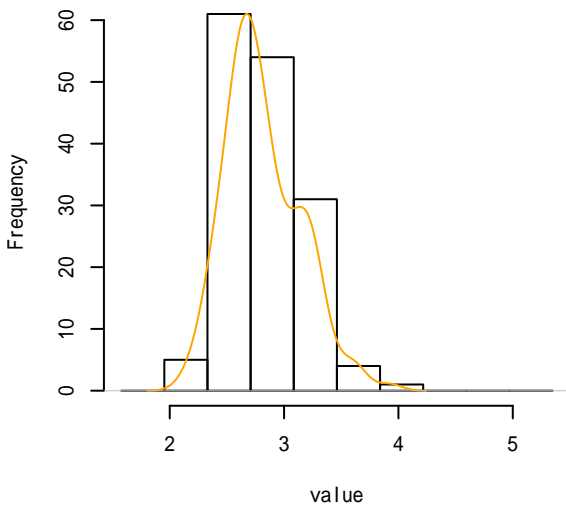

MALE BD(Acoustic) Excluded by Med.  
p-val= 0.6918

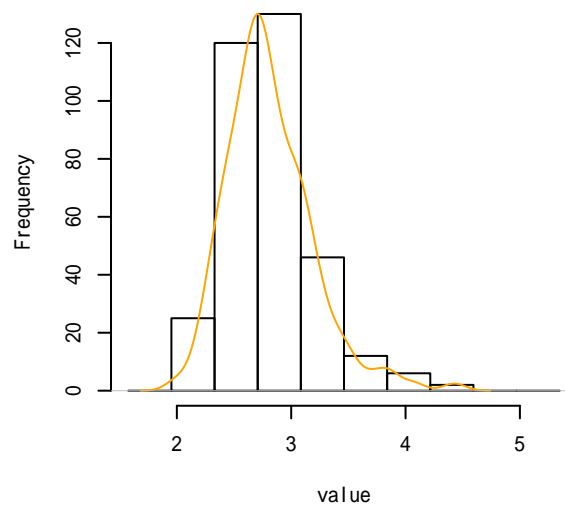

MALE BD(Acoustic) Excluded by 1 visit  
pval= 0.54917

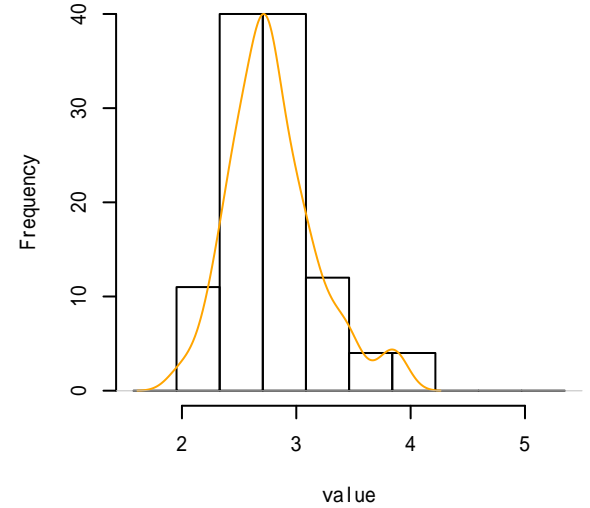

MALE BD(Zscore) Included

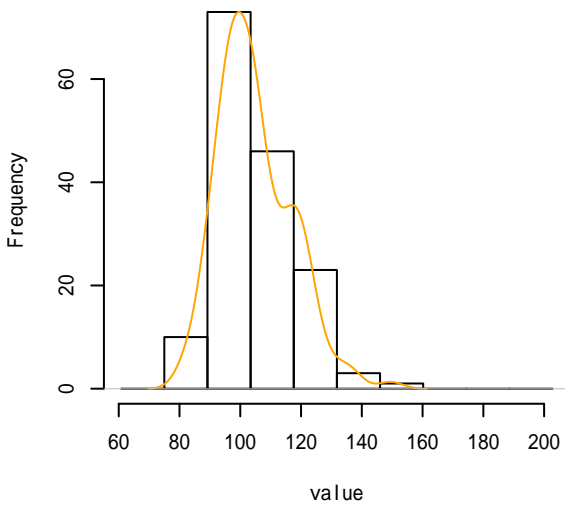

MALE BD(Zscore) Excluded by Med.  
p-val= 0.61417

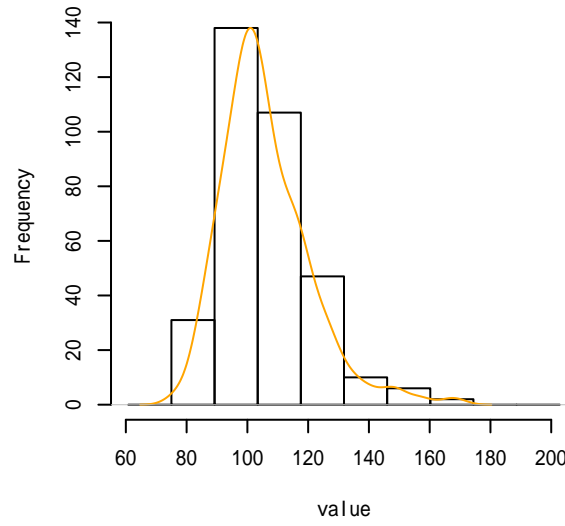

MALE BD(Zscore) Excluded by 1 visit  
pval= 0.99679

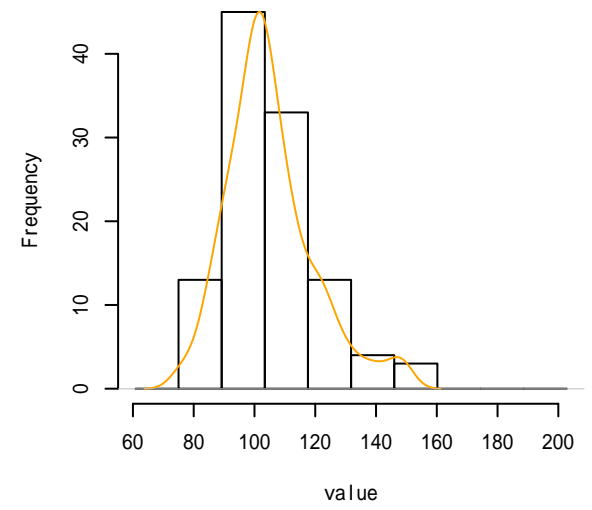

MALE BD(Tscore) Included

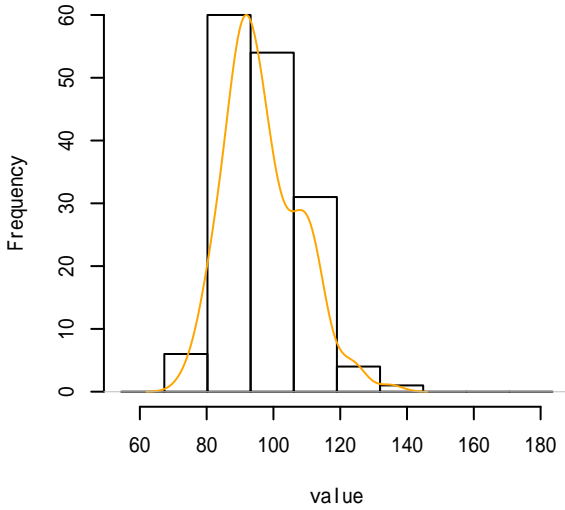

MALE BD(Tscore) Excluded by Med.  
p-val= 0.69252

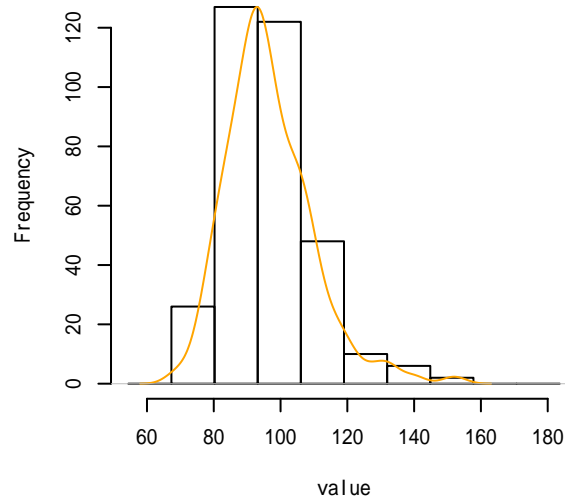

MALE BD(Tscore) Excluded by 1 visit  
pval= 0.54913

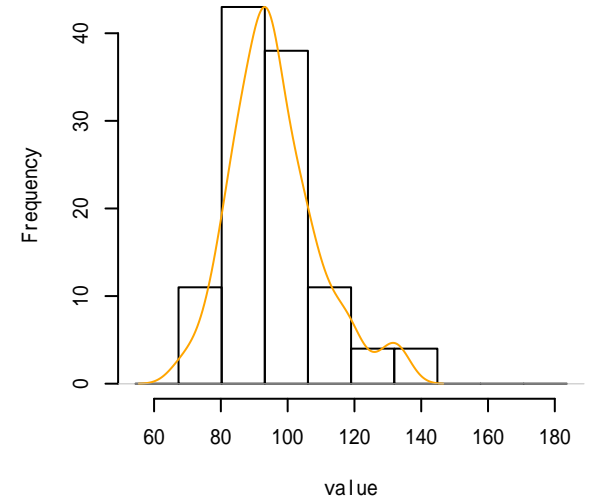

MALE Glucose Included

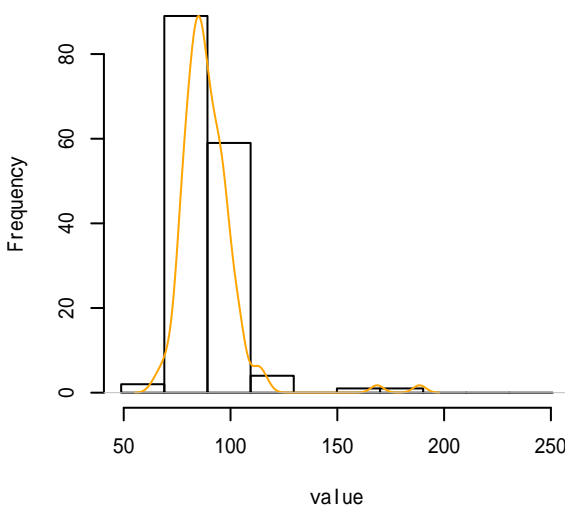

MALE Glucose Excluded by Med.  
p-val= 0.00017

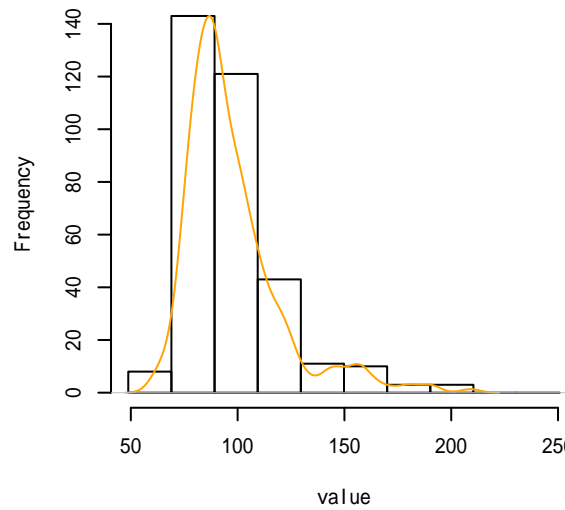

MALE Glucose Excluded by 1 visit  
pval= 0.0631

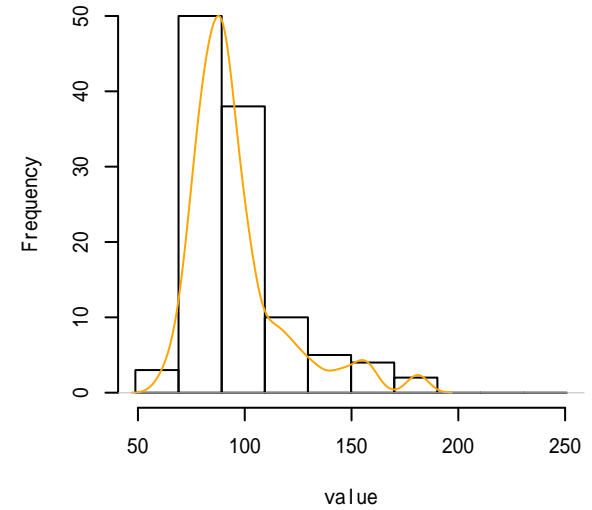

MALE HbA1c Included

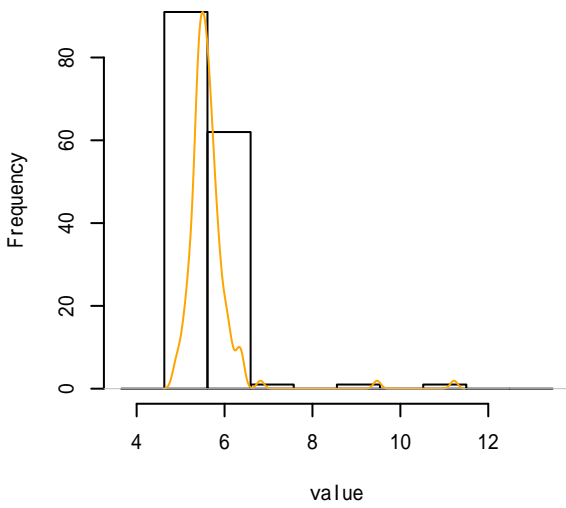

MALE HbA1c Excluded by Med.  
p-val= 0.00224

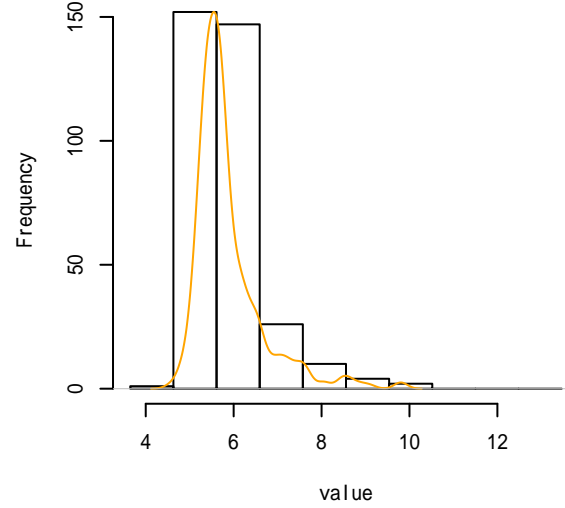

MALE HbA1c Excluded by 1 visit  
pval= 0.29558

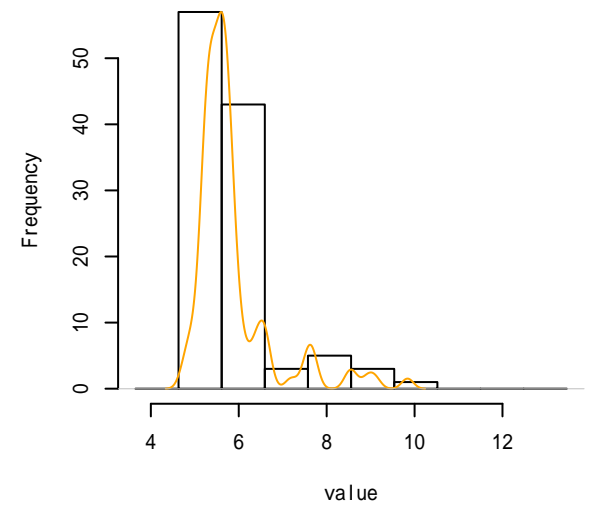

MALE Muscle Included

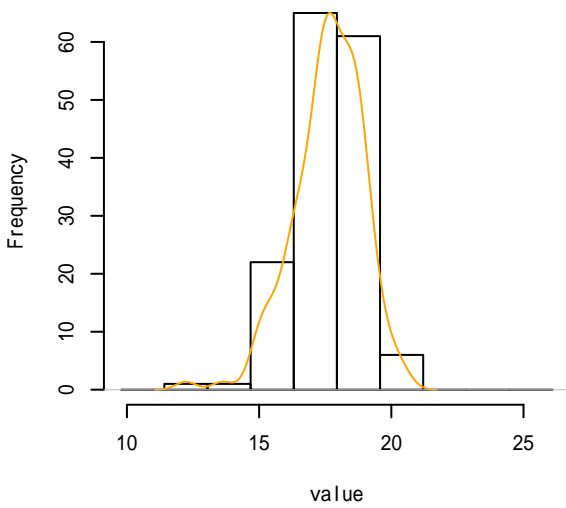

MALE Muscle Excluded by Med.  
p-val= 0.52161

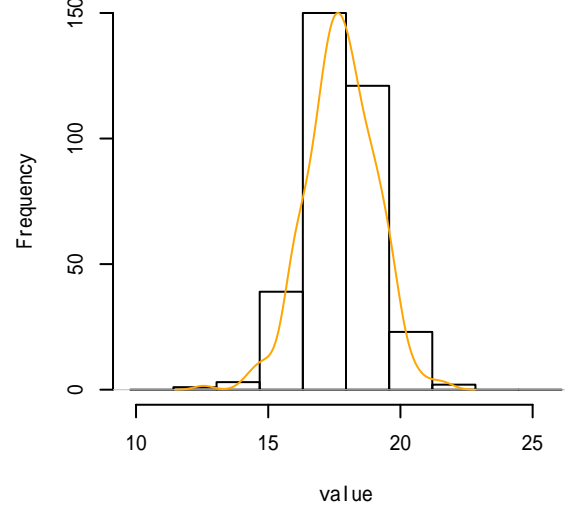

MALE Muscle Excluded by 1 visit  
pval= 0.5343

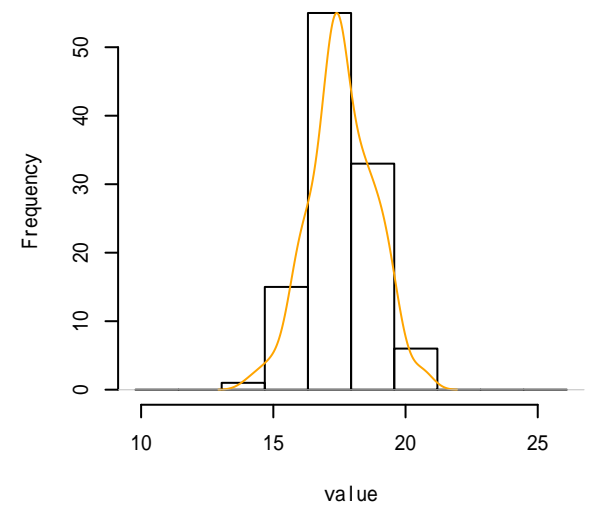

MALE WBC Included

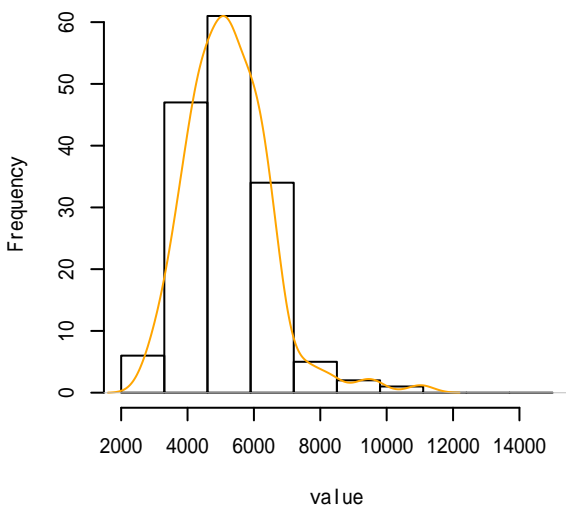

MALE WBC Excluded by Med.  
p-val= 0.07558

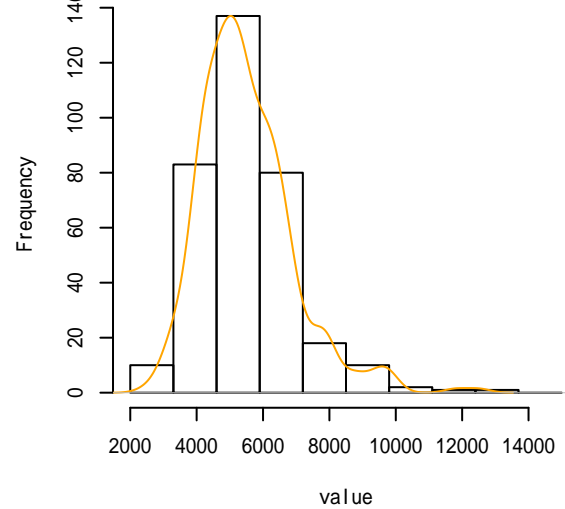

MALE WBC Excluded by 1 visit  
pval= 0.40419

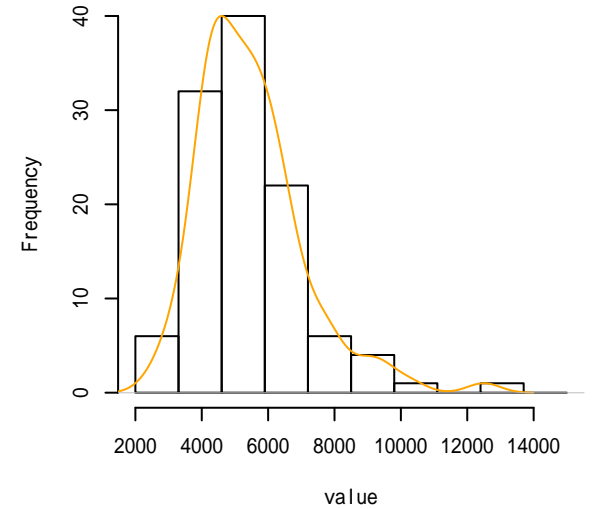

MALE RBC Included

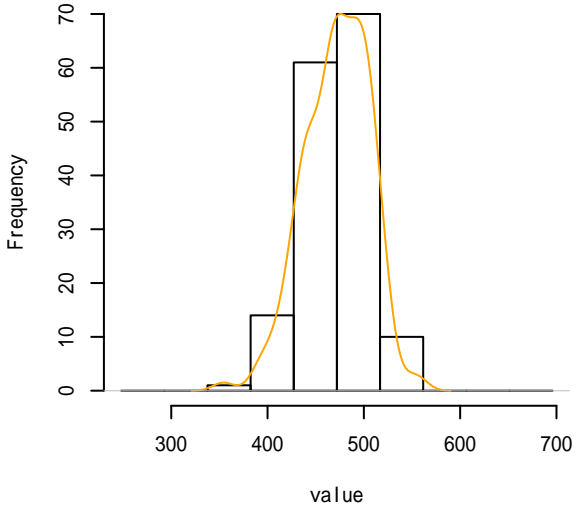

MALE RBC Excluded by Med.  
p-val= 0.70993

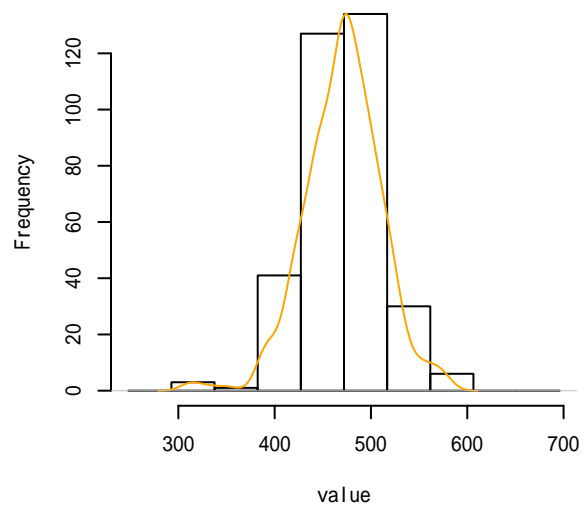

MALE RBC Excluded by 1 visit  
pval= 0.76387

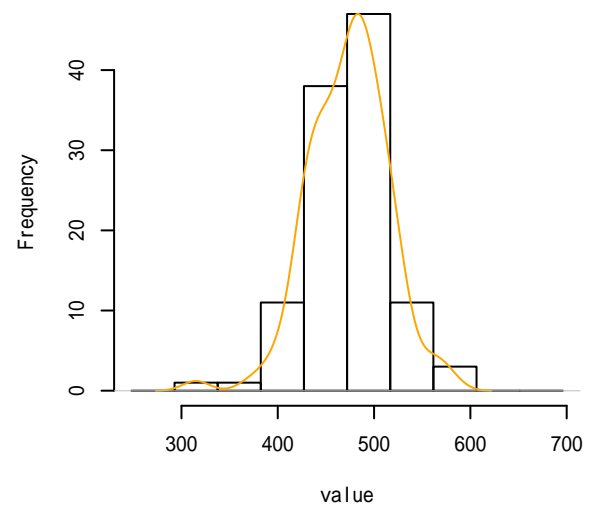

MALE Hemoglobin Included

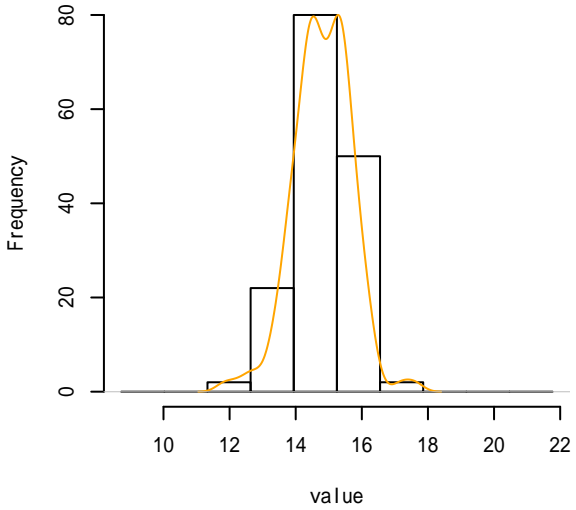

MALE Hemoglobin Excluded by Med.  
p-val= 0.79706

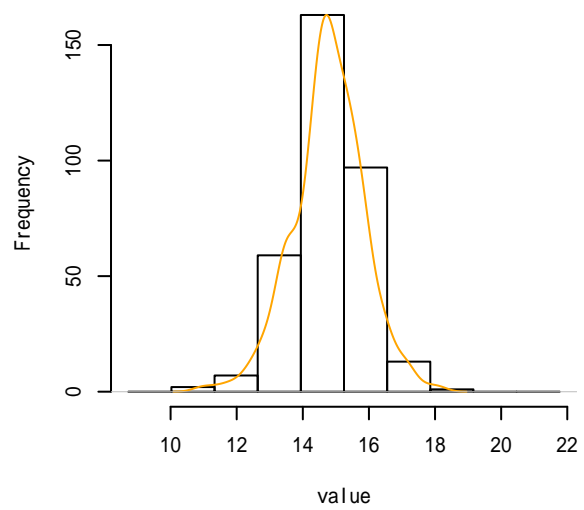

MALE Hemoglobin Excluded by 1 visit  
pval= 0.79819

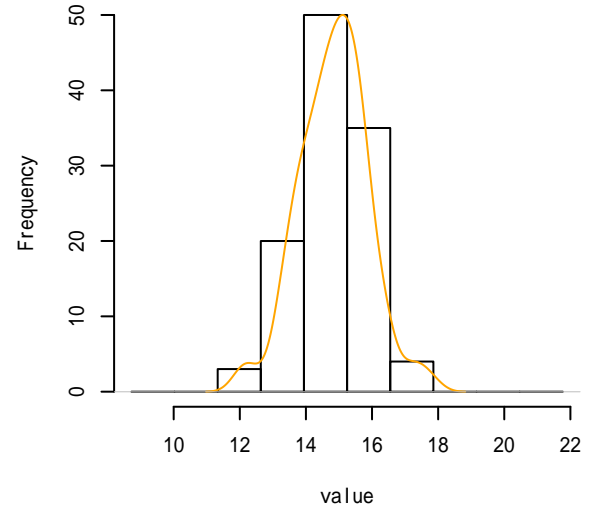

MALE Hematocrit Included

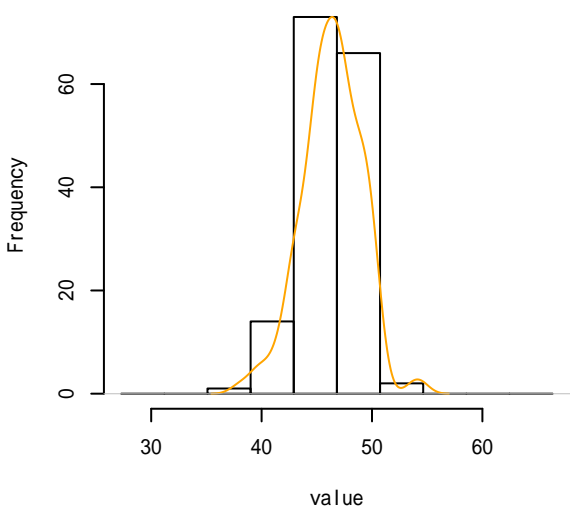

MALE Hematocrit Excluded by Med.  
p-val= 0.72347

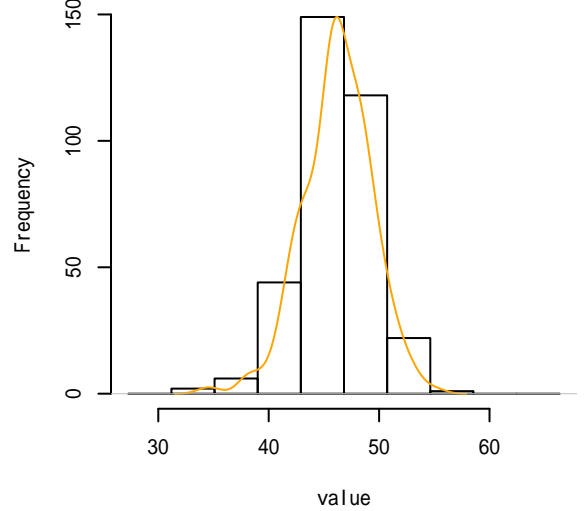

MALE Hematocrit Excluded by 1 visit  
pval= 0.95922

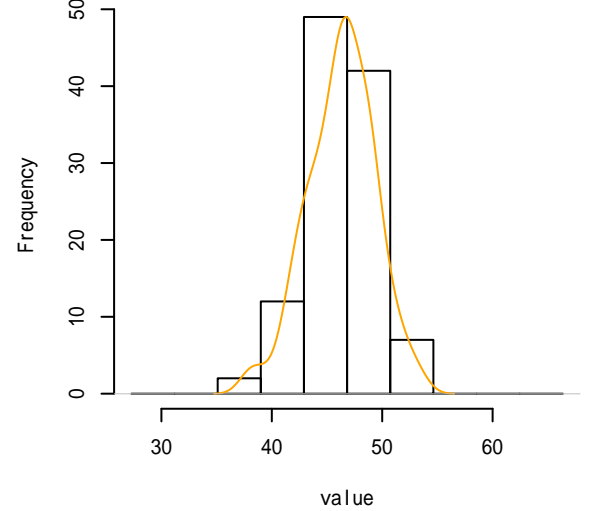

MALE MCV Included

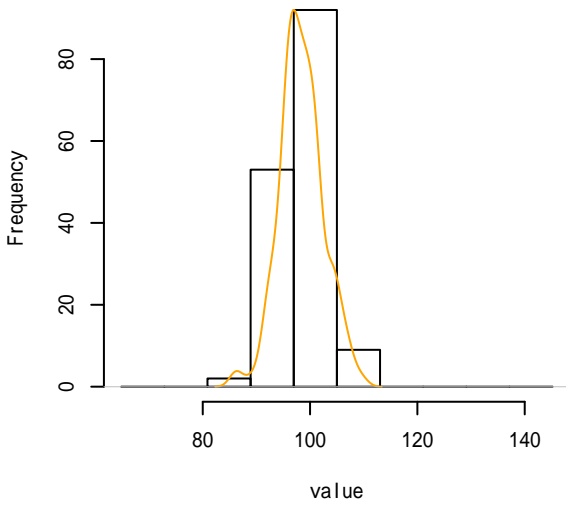

MALE MCV Excluded by Med.  
p-val= 0.76476

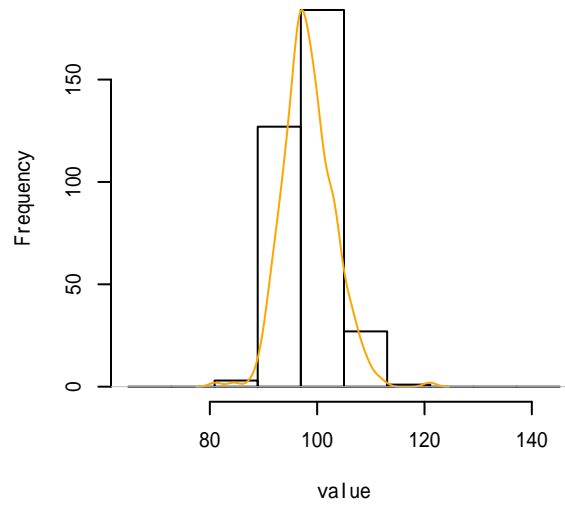

MALE MCV Excluded by 1 visit  
pval= 0.28291

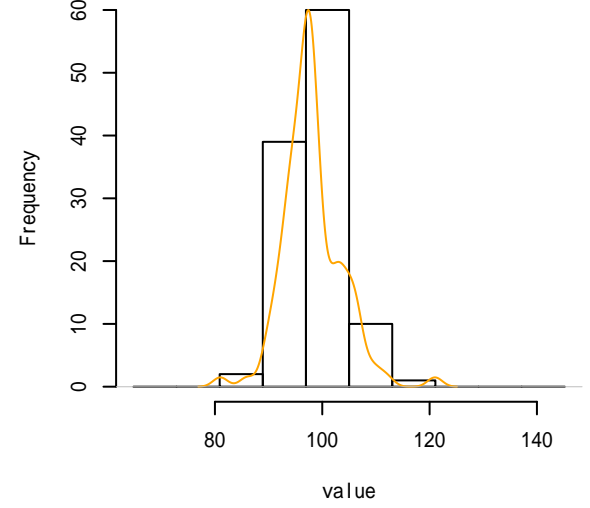

MALE MCH Included

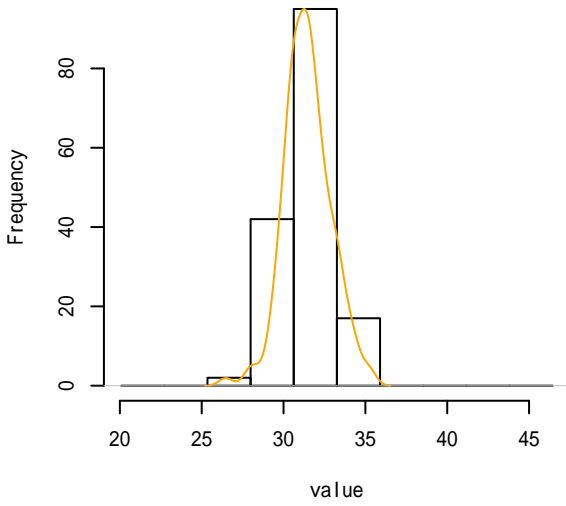

MALE MCH Excluded by Med.  
p-val= 0.95101

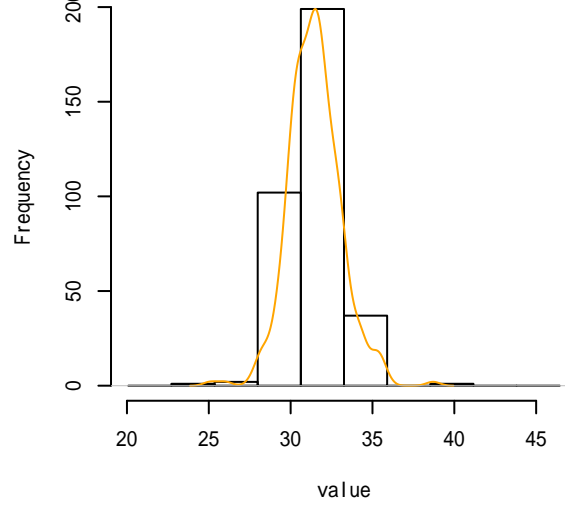

MALE MCH Excluded by 1 visit  
pval= 0.59907

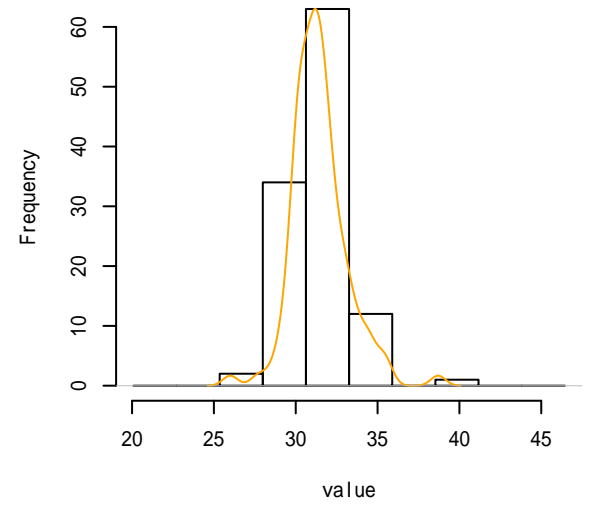

MALE MCHC Included

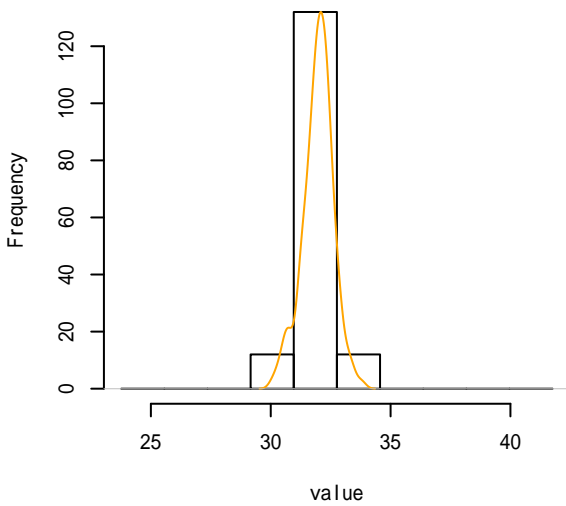

MALE MCHC Excluded by Med.  
p-val= 0.61053

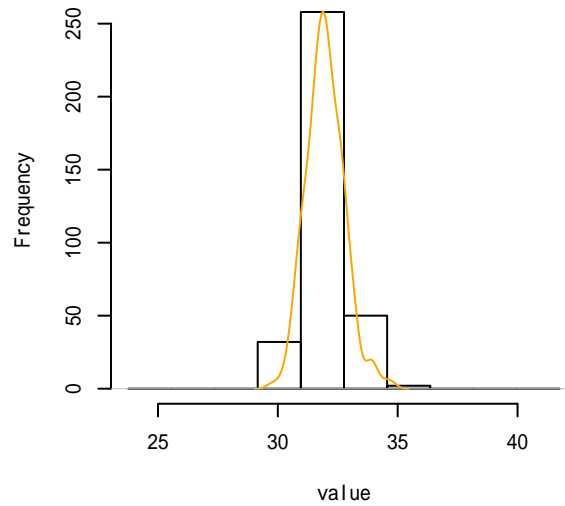

MALE MCHC Excluded by 1 visit  
pval= 0.41319

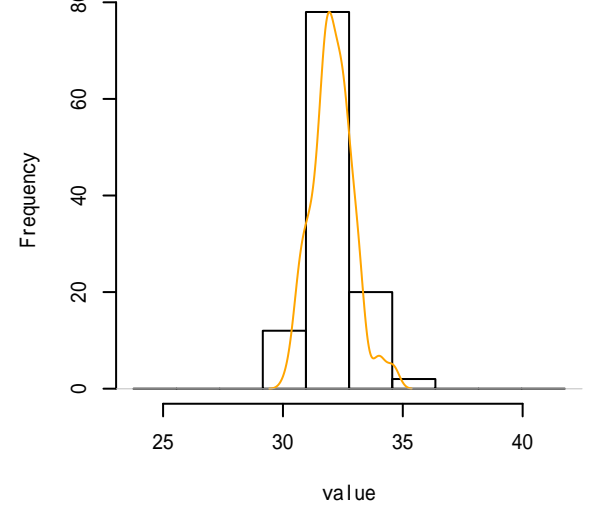

MALE Totalbilirubin Included

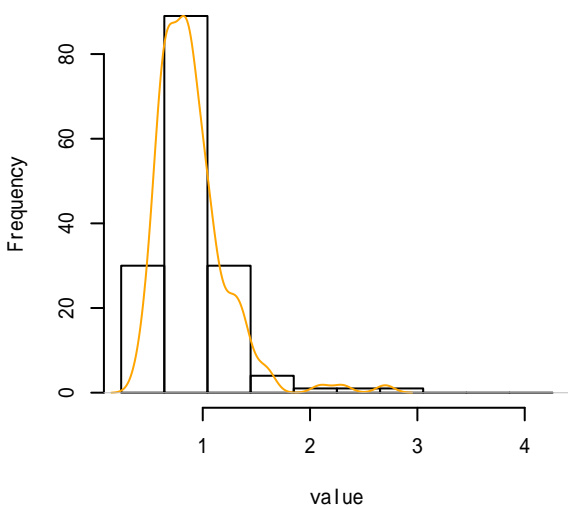

MALE Totalbilirubin Excluded by Med.  
p-val= 0.15468

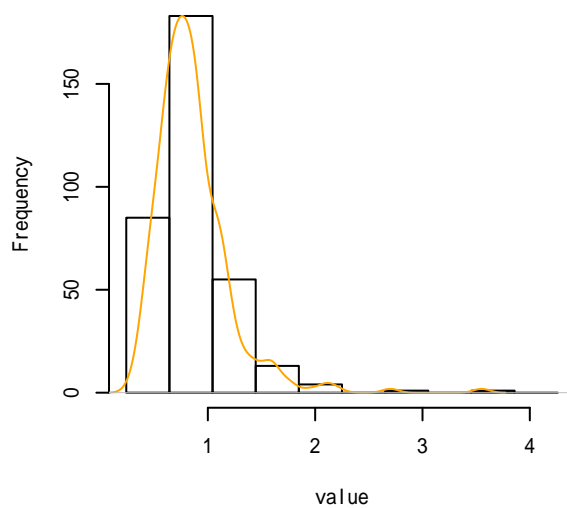

MALE Totalbilirubin Excluded by 1 visit  
pval= 0.08495

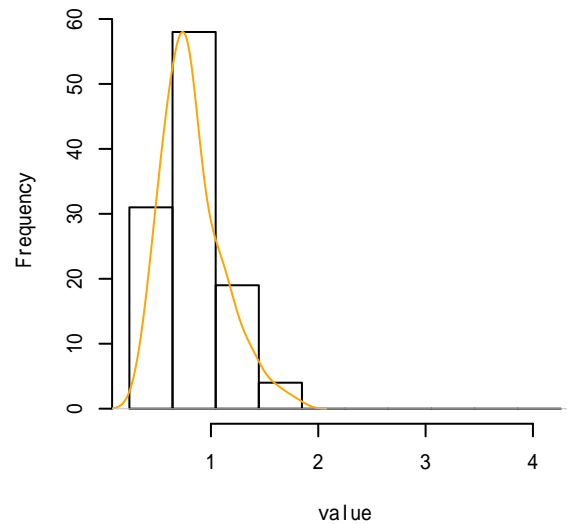

MALE AST Included

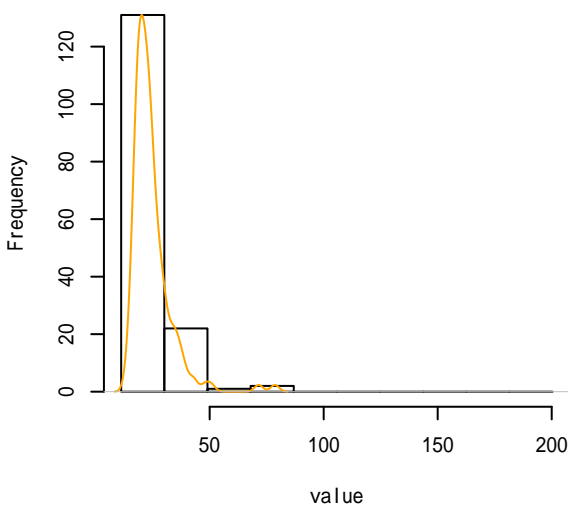

MALE AST Excluded by Med.  
p-val= 0.00132

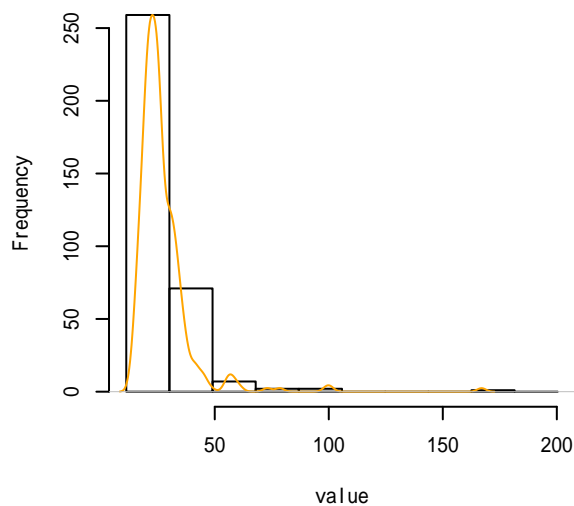

MALE AST Excluded by 1 visit  
pval= 0.172

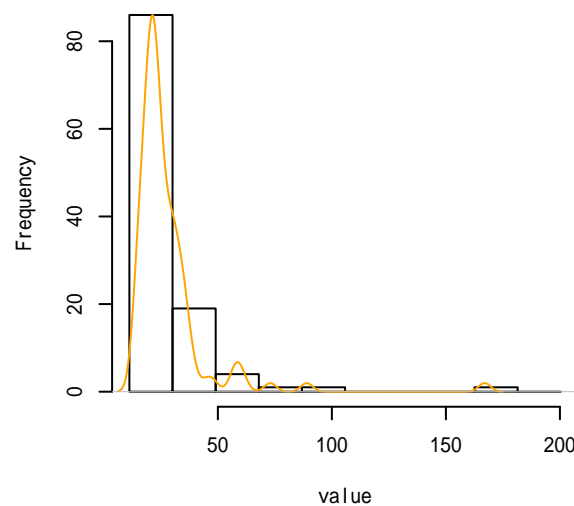

MALE ALT Included

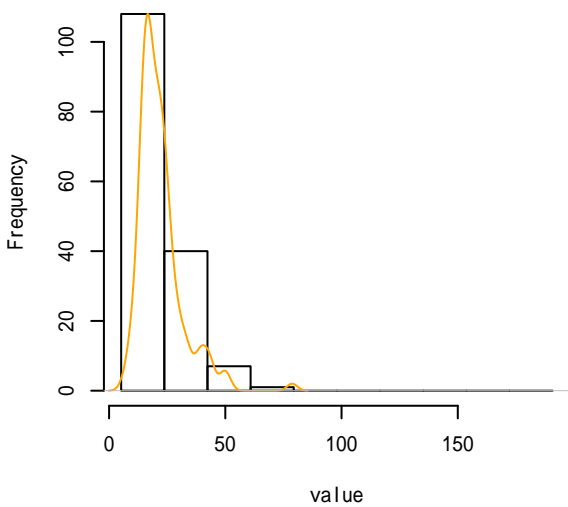

MALE ALT Excluded by Med.  
p-val= 0.00025

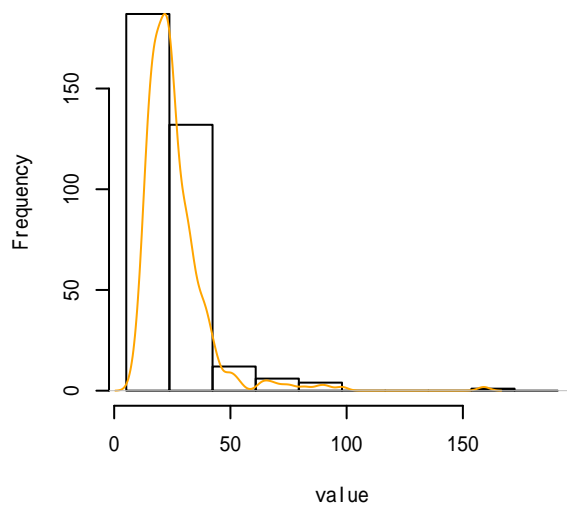

MALE ALT Excluded by 1 visit  
pval= 0.1116

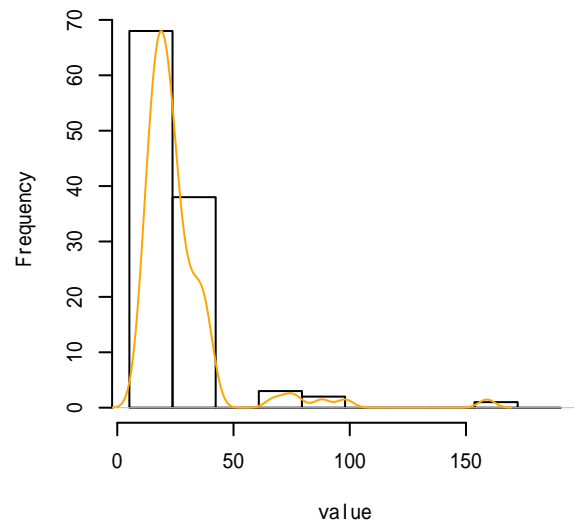

MALE TotalProtein Included

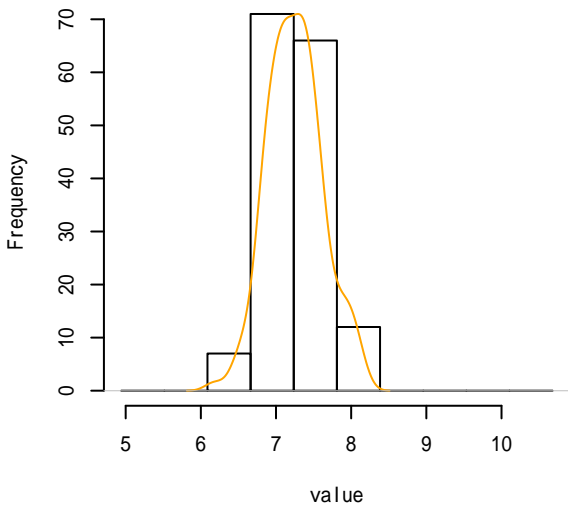

MALE TotalProtein Excluded by Med.  
p-val= 0.04257

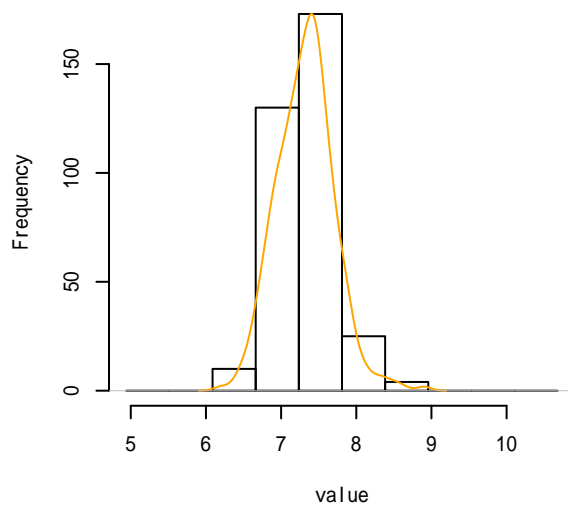

MALE TotalProtein Excluded by 1 visit  
pval= 0.46448

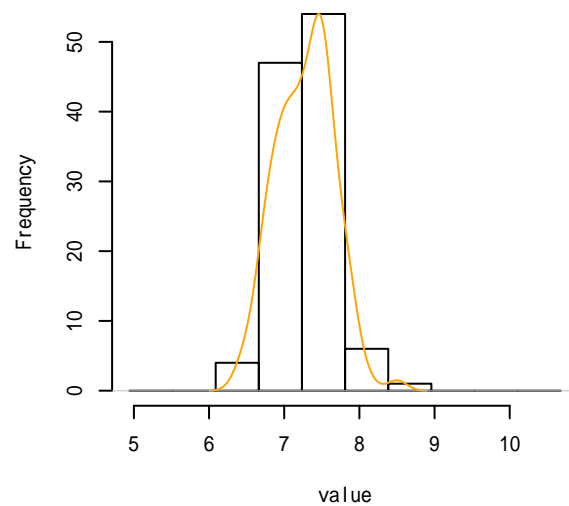

MALE ALB Included

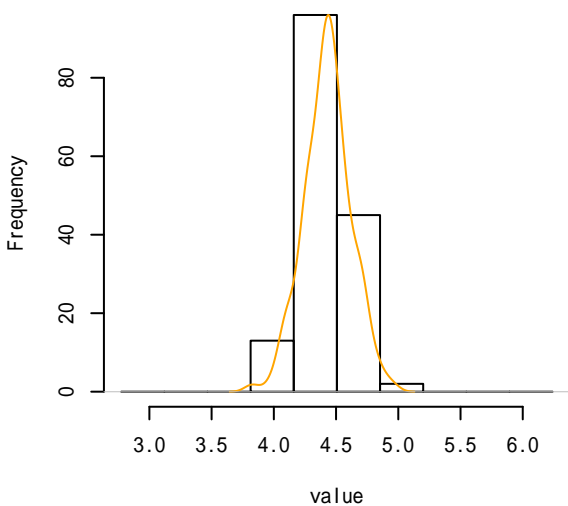

MALE ALB Excluded by Med.  
p-val= 0.99919

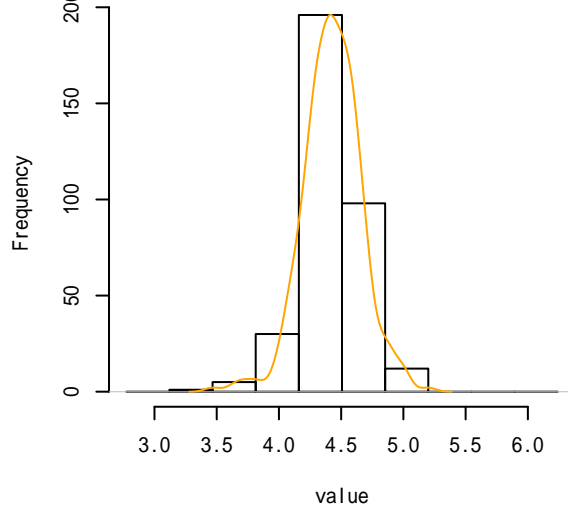

MALE ALB Excluded by 1 visit  
pval= 0.15627

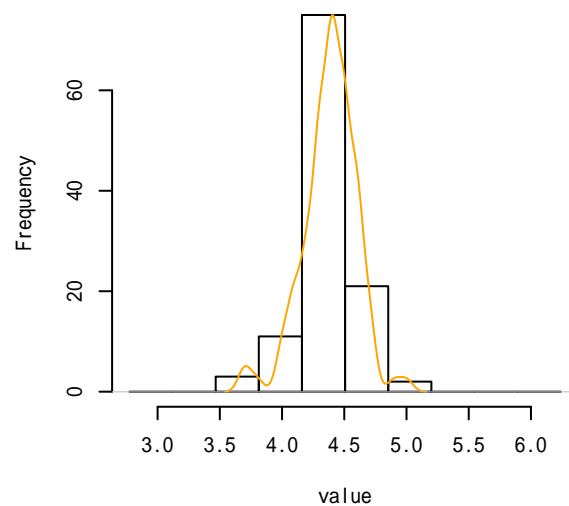

MALE Creatinine Included

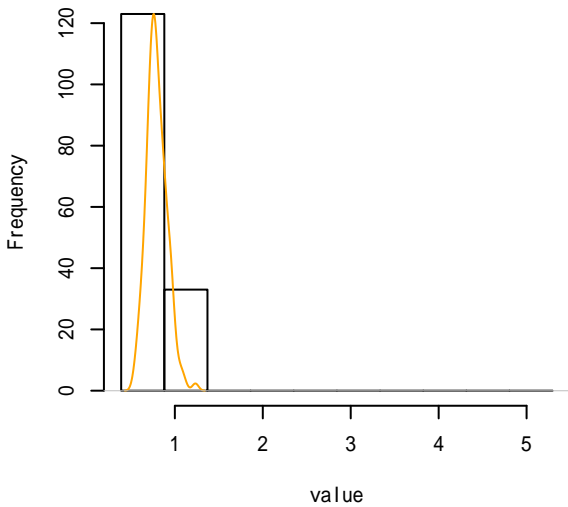

MALE Creatinine Excluded by Med.  
p-val= 0.51076

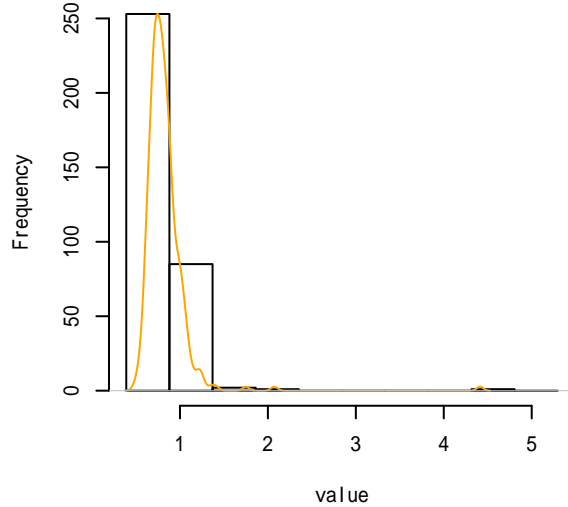

MALE Creatinine Excluded by 1 visit  
pval= 0.43643

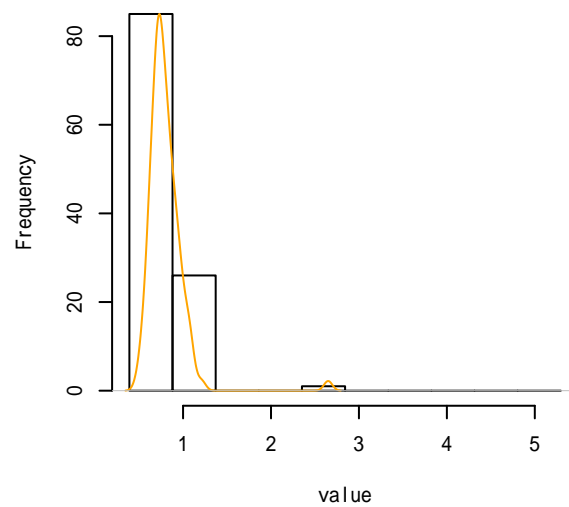



MALE UreaNitrogen Included

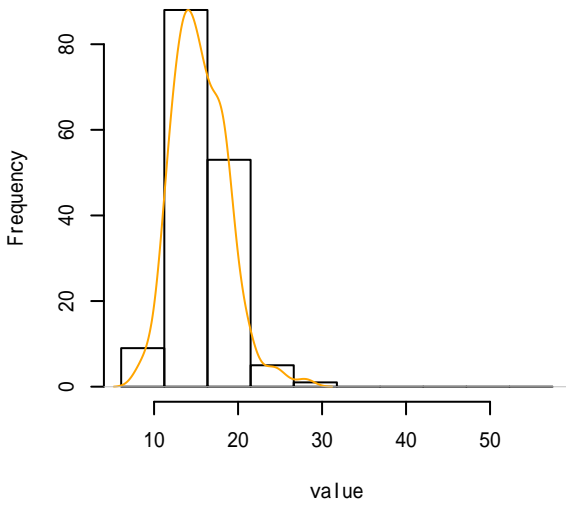

MALE UreaNitrogen Excluded by Med.  
p-val= 0.14075

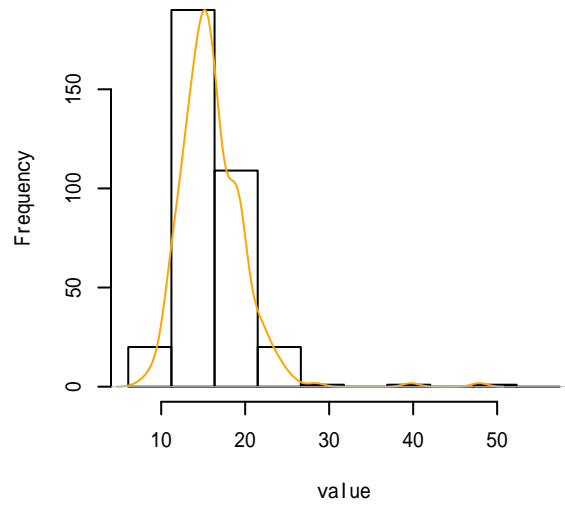

MALE UreaNitrogen Excluded by 1 visit  
pval= 0.50011

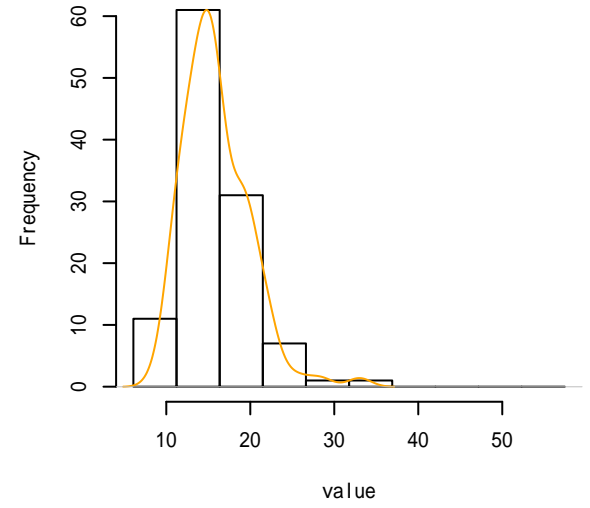

MALE UricAcid Included

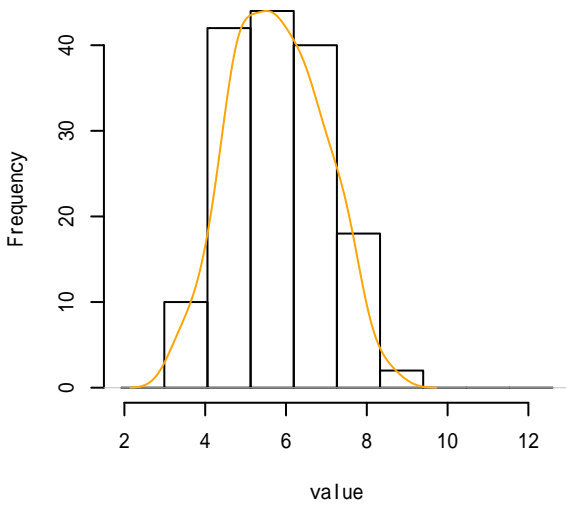

MALE UricAcid Excluded by Med.  
p-val= 0.50409

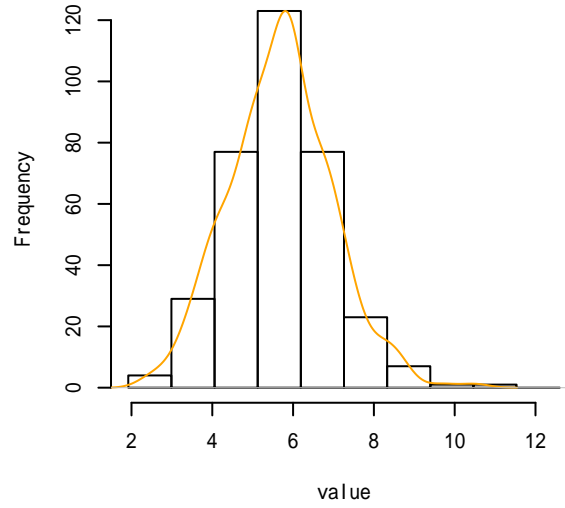

MALE UricAcid Excluded by 1 visit  
pval= 0.27931

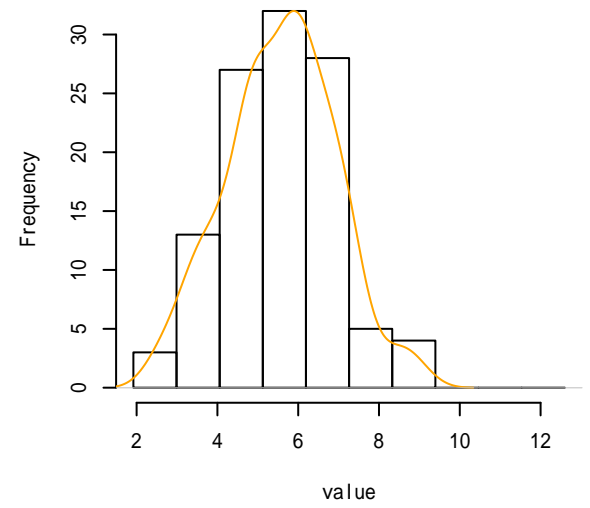

MALE TotalCholesterol Included

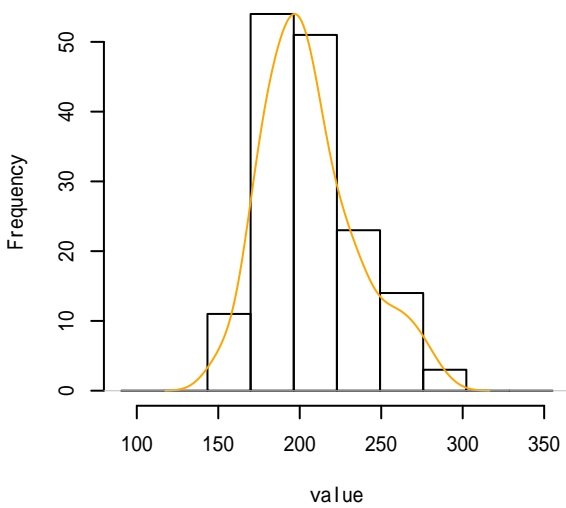

MALE TotalCholesterol Excluded by Med.  
p-val= 0.0082

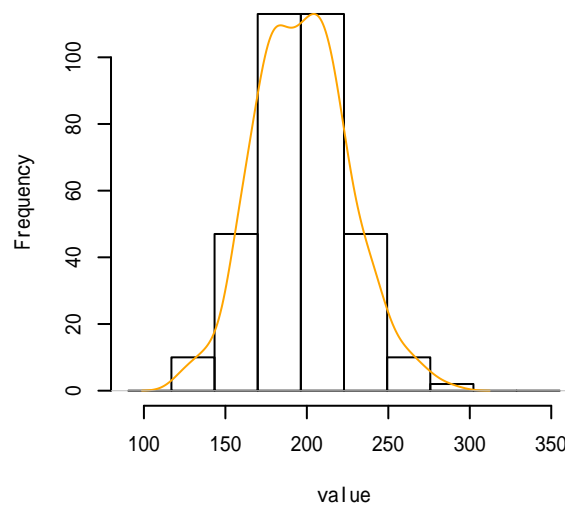

MALE TotalCholesterol Excluded by 1 visit  
pval= 0.00322

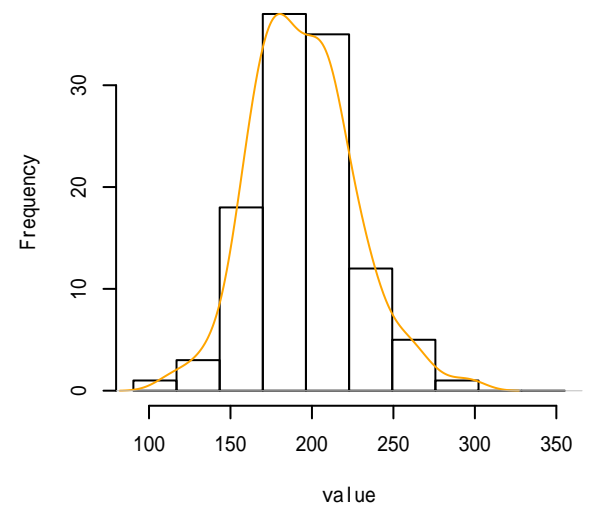

MALE TG Included

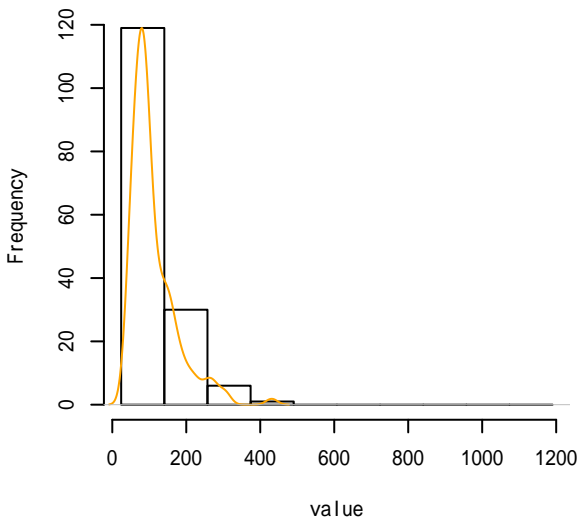

MALE TG Excluded by Med.  
p-val= 0.58587

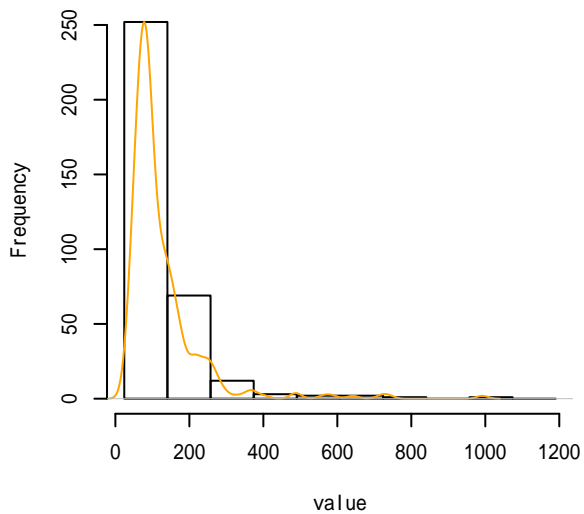

MALE TG Excluded by 1 visit  
pval= 0.28941

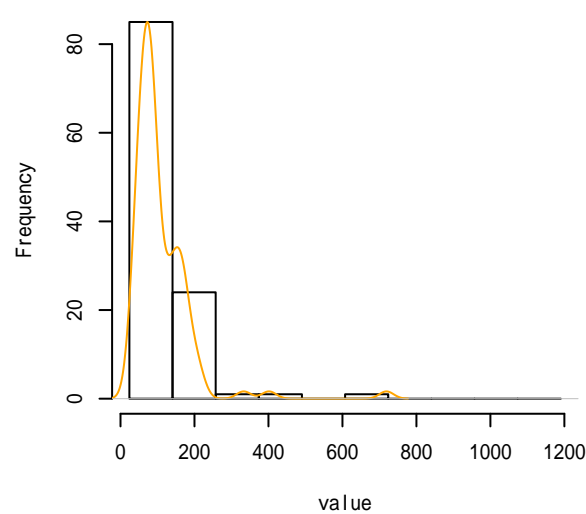

MALE HDL Included

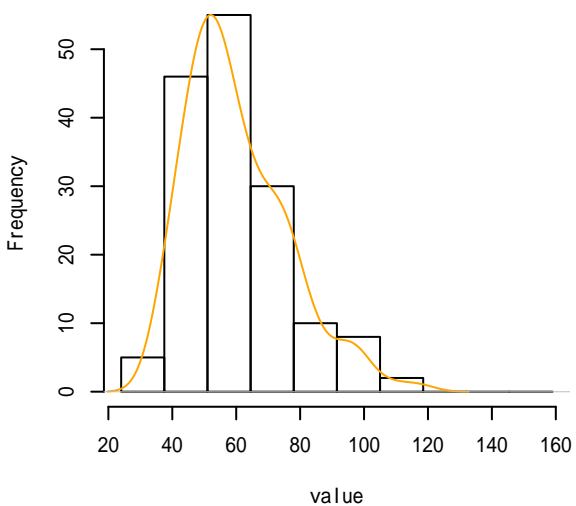

MALE HDL Excluded by Med.  
p-val= 0.58912

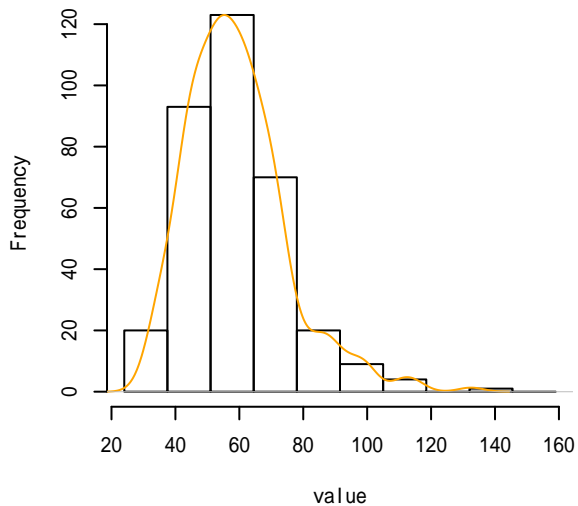

MALE HDL Excluded by 1 visit  
pval= 0.31677

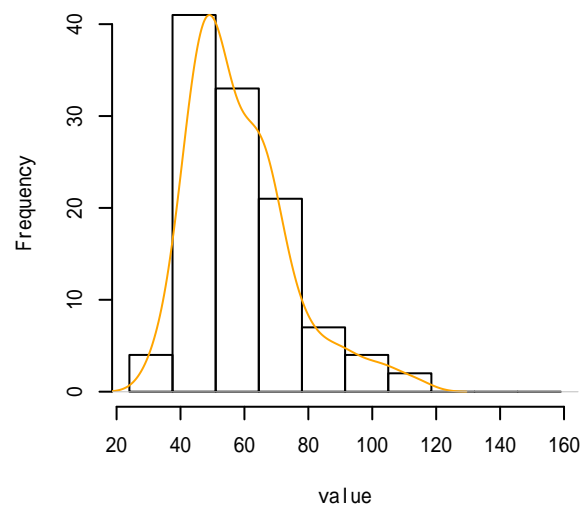

MALE LDL Included

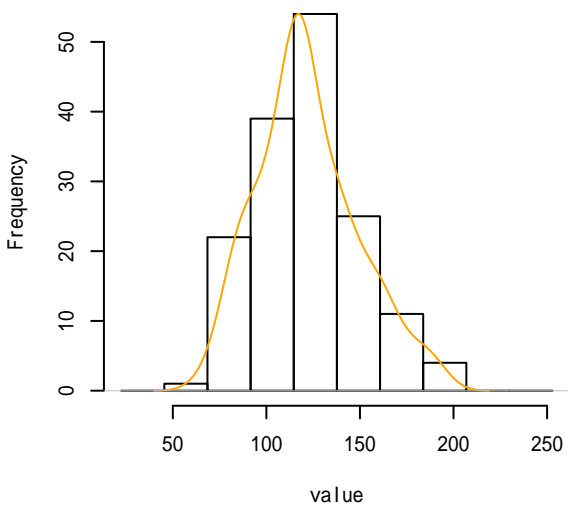

MALE LDL Excluded by Med.  
p-val= 0.00063

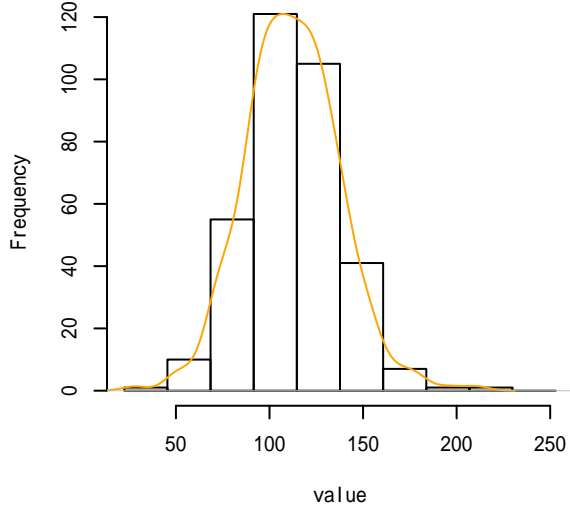

MALE LDL Excluded by 1 visit  
pval= 0.00626

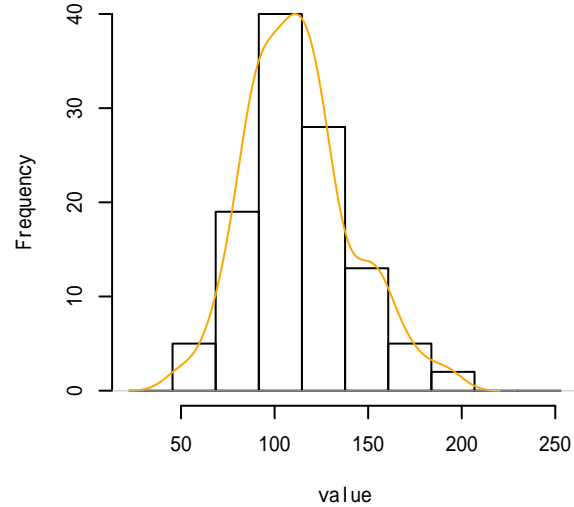

MALE Sodium Included

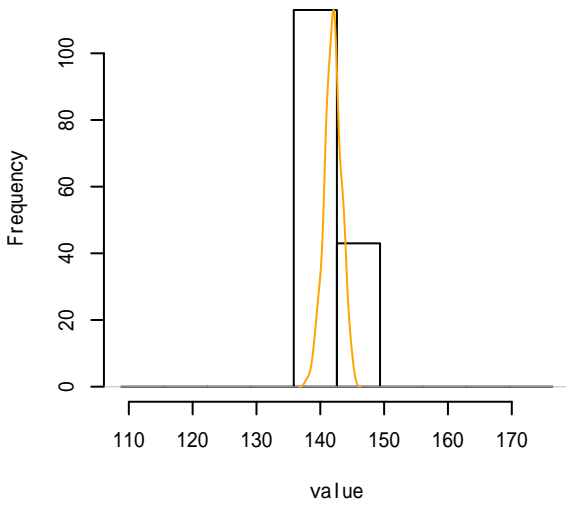

MALE Sodium Excluded by Med.  
p-val= 0.00718

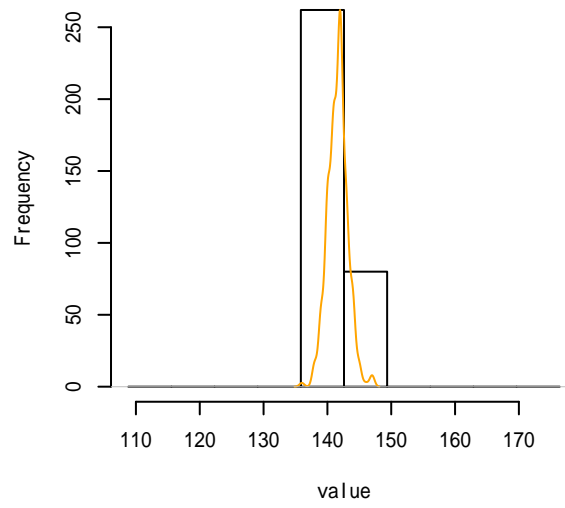

MALE Sodium Excluded by 1 visit  
pval= 0.11647

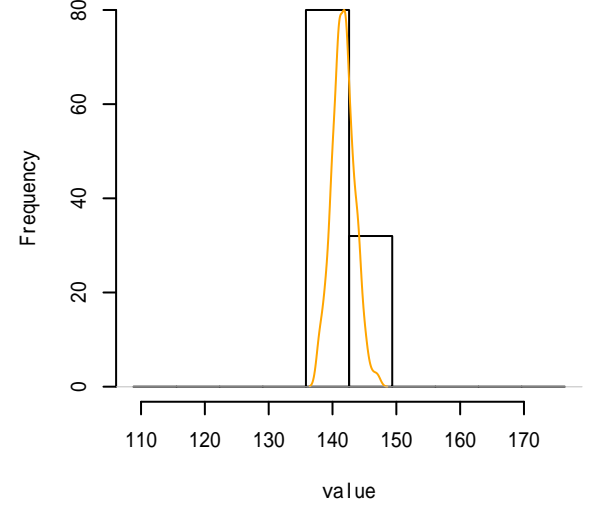

MALE Potassium Included

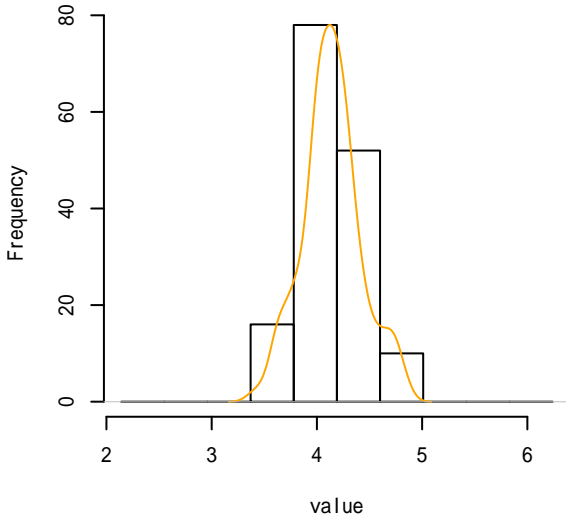

MALE Potassium Excluded by Med.  
p-val= 0.02847

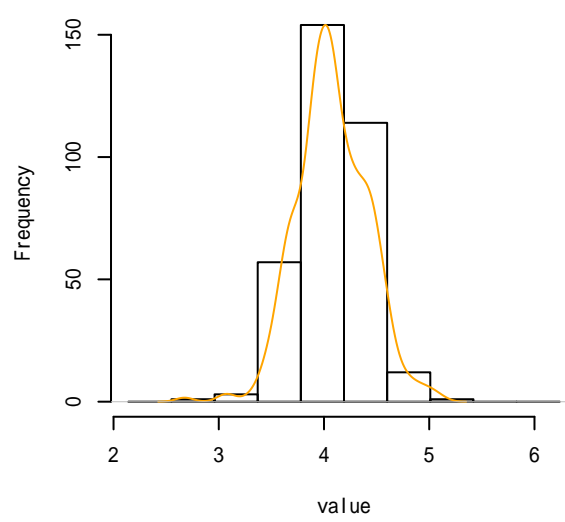

MALE Potassium Excluded by 1 visit  
pval= 0.55574

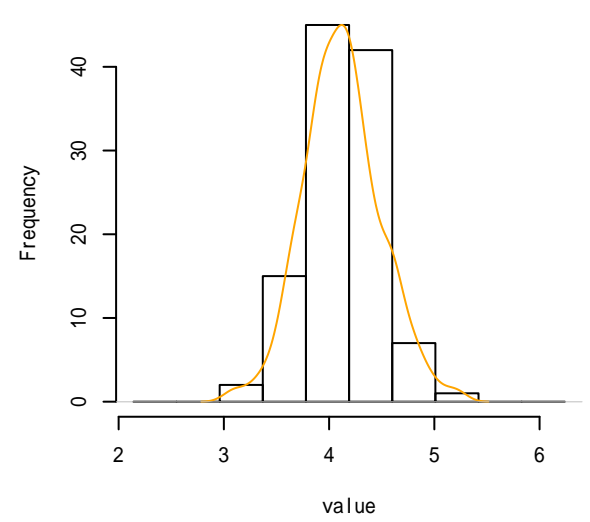

MALE Chlorine Included

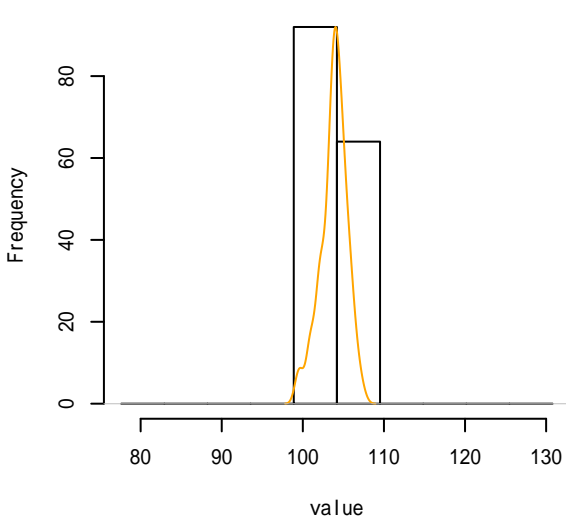

MALE Chlorine Excluded by Med.  
p-val= 0.00048

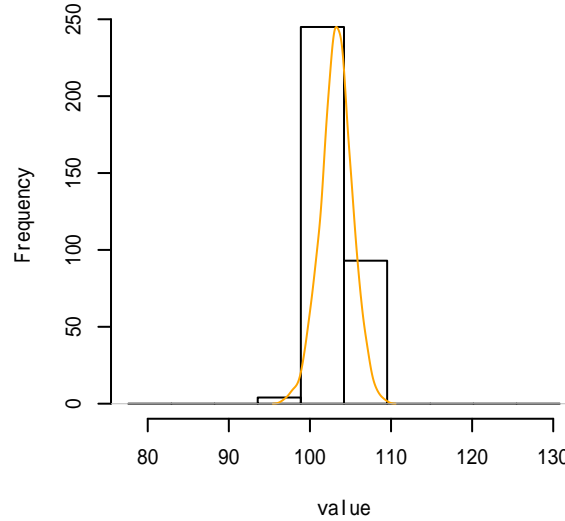

MALE Chlorine Excluded by 1 visit  
pval= 0.34122

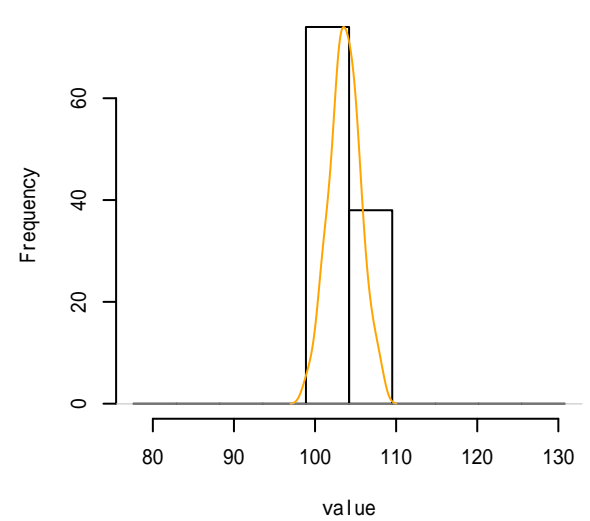

MALE Calcium Included

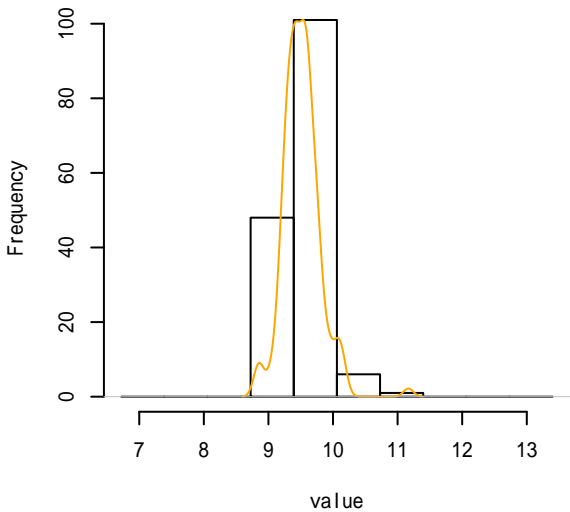

MALE Calcium Excluded by Med.  
p-val= 0.6429

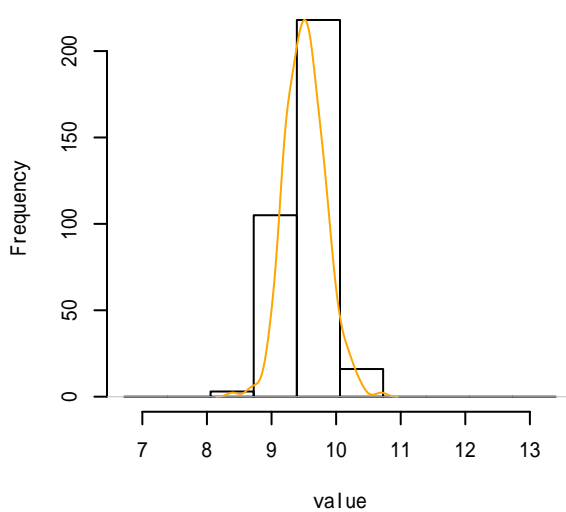

MALE Calcium Excluded by 1 visit  
pval= 0.74409

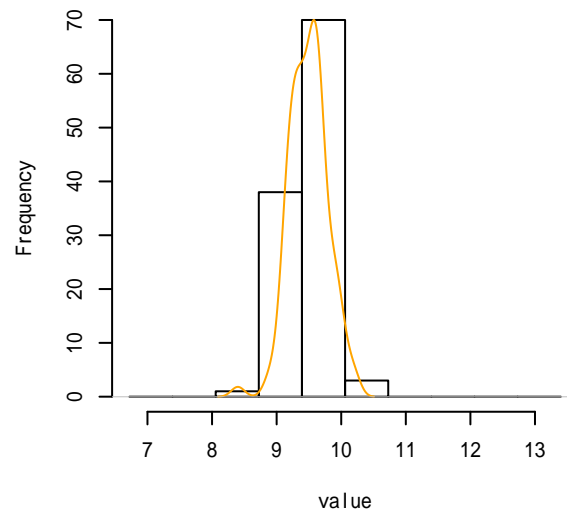

MALE InorganicPhosphorus Included

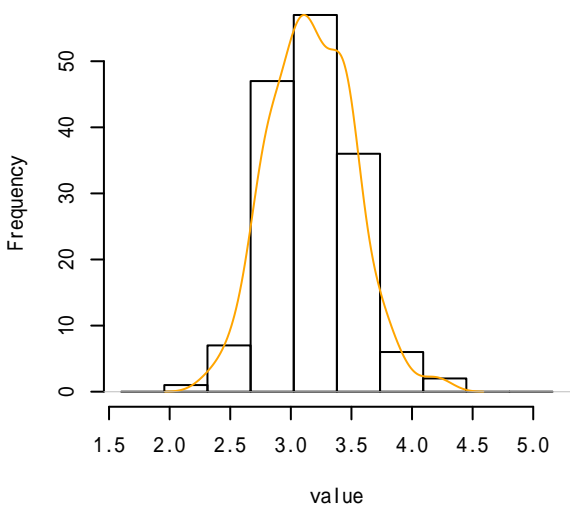

MALE InorganicPhosphorus Excluded by Med.  
p-val= 0.85159

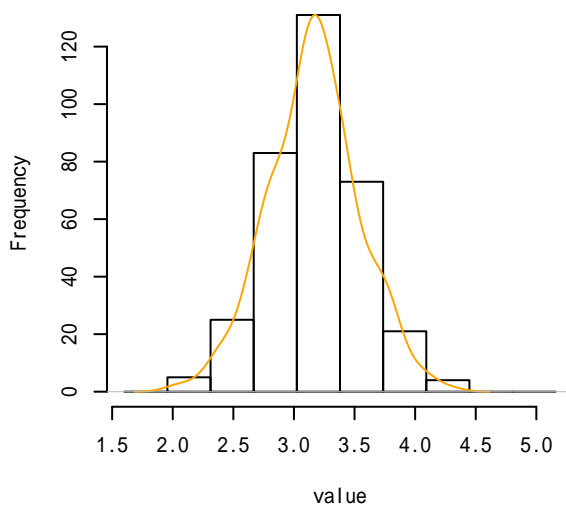

MALE InorganicPhosphorus Excluded by 1 visit  
pval= 0.68111

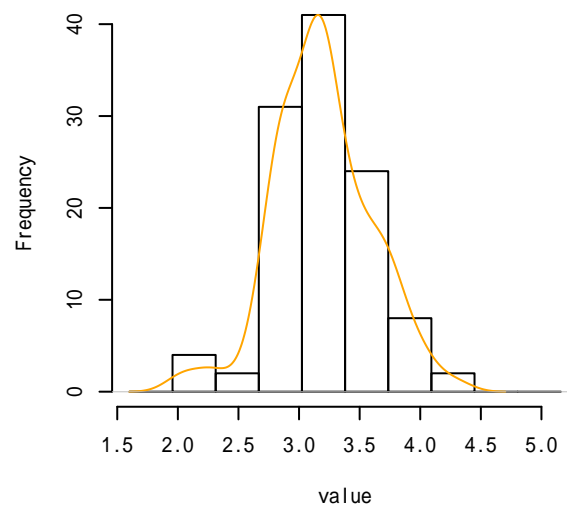

MALE SerumIron Included

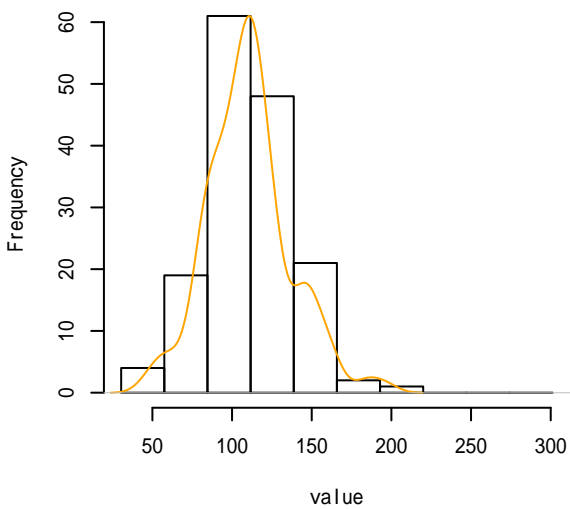

MALE SerumIron Excluded by Med.  
p-val= 0.00545

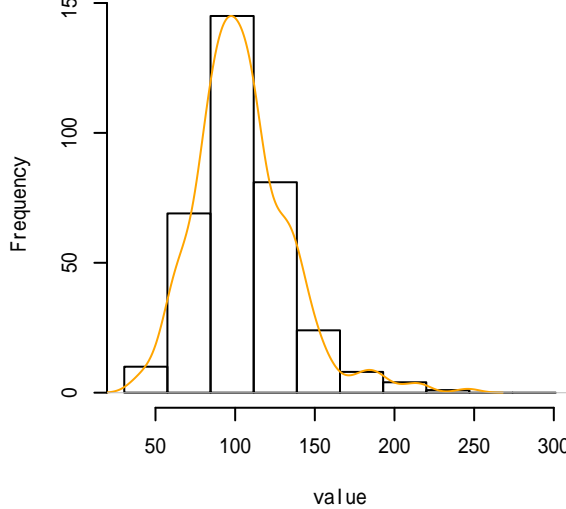

MALE SerumIron Excluded by 1 visit  
pval= 0.00749

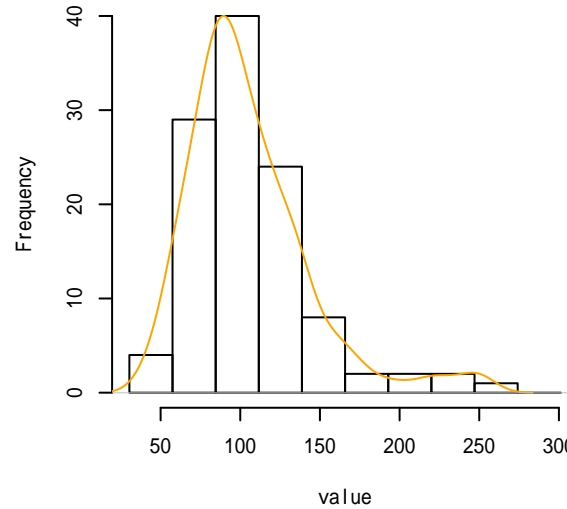

MALE C3 Included

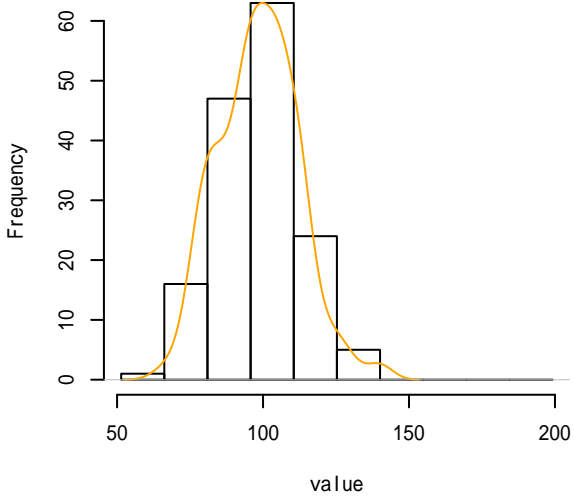

MALE C3 Excluded by Med.  
p-val= 0.01751

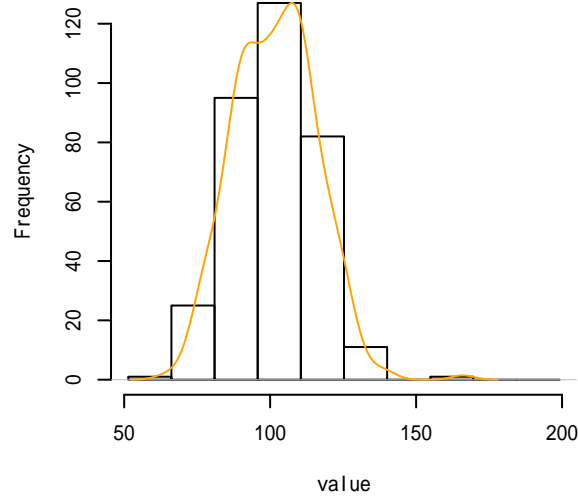

MALE C3 Excluded by 1 visit  
pval= 0.70074

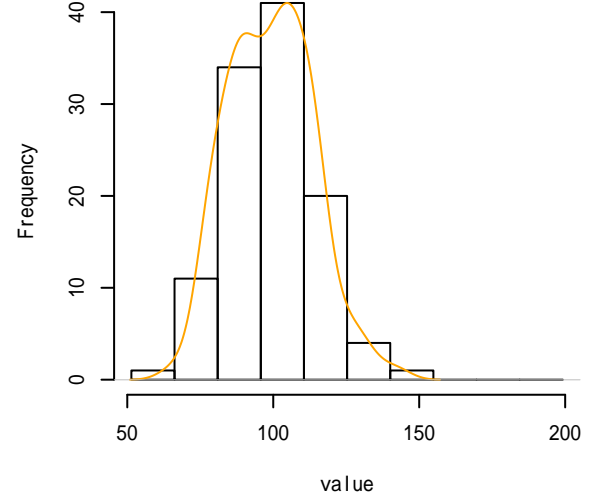

MALE C4 Included

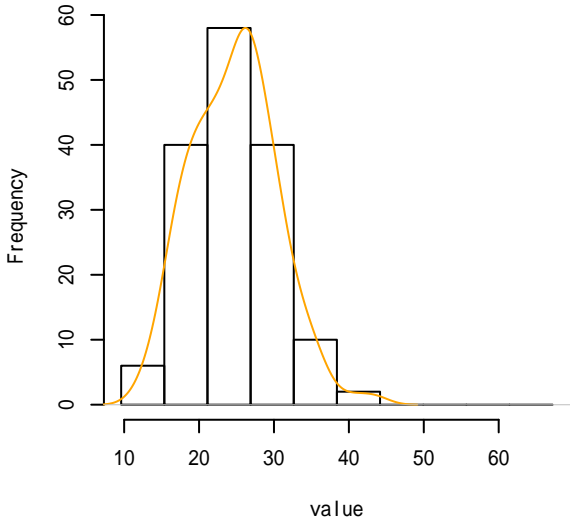

MALE C4 Excluded by Med.  
p-val= 0.45318

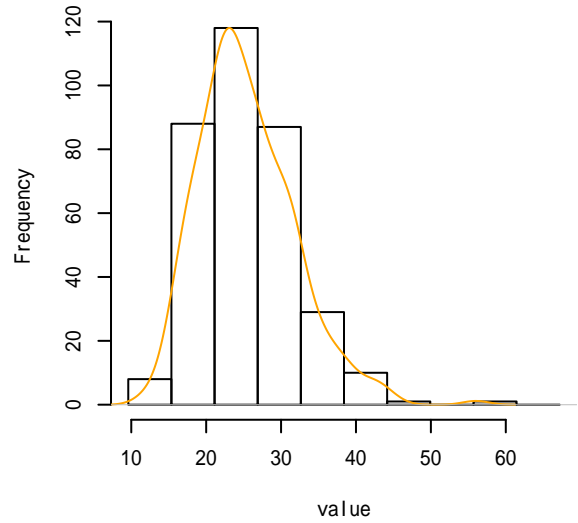

MALE C4 Excluded by 1 visit  
pval= 0.98533

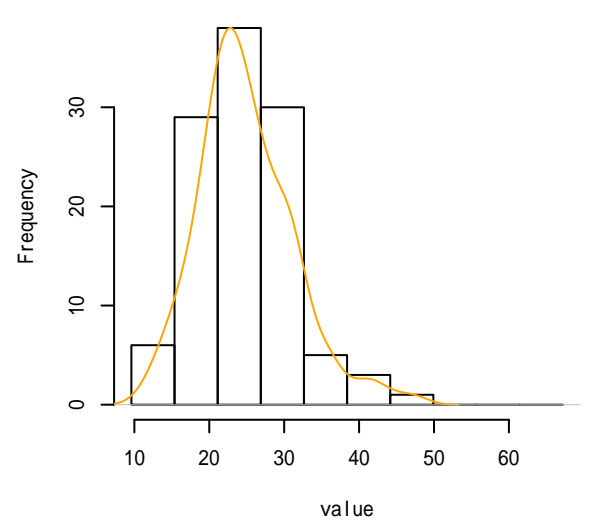

MALE nonHDL Included

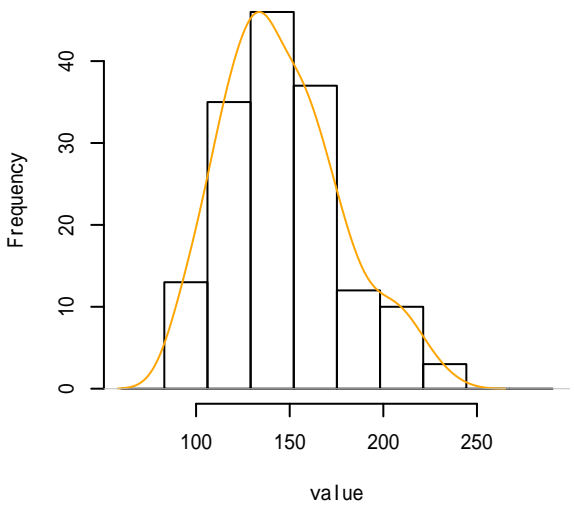

MALE nonHDL Excluded by Med.  
p-val= 0.01595

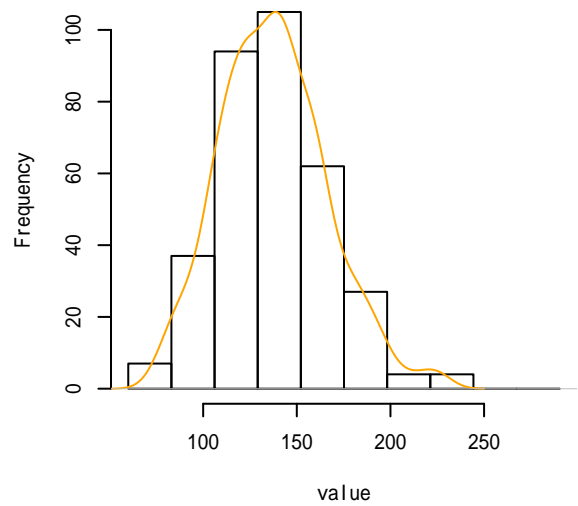

MALE nonHDL Excluded by 1 visit  
pval= 0.00939

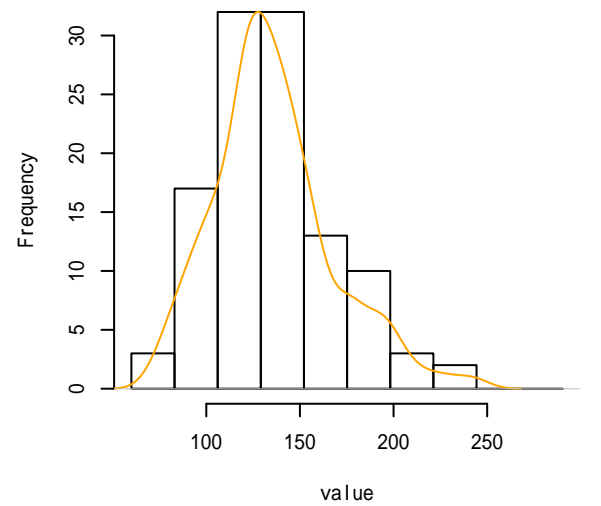

FEMALE Age Included

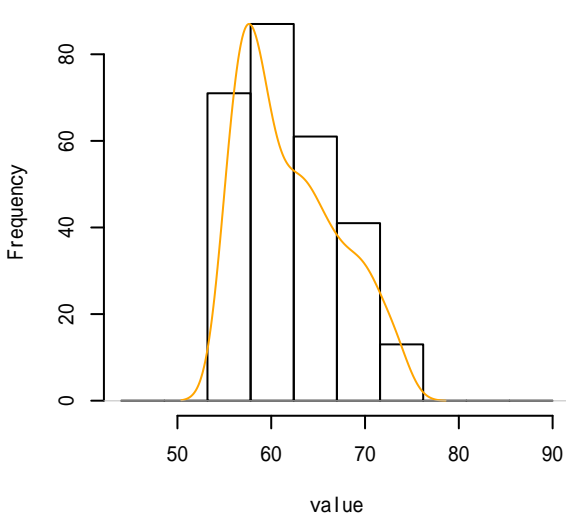

FEMALE Age Excluded by Med.  
p-val= LessThan1.0E-10

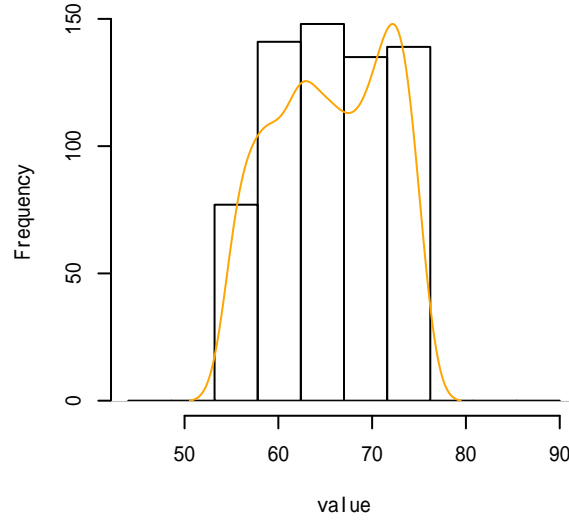

FEMALE Age Excluded by 1 visit  
pval= 0.09893

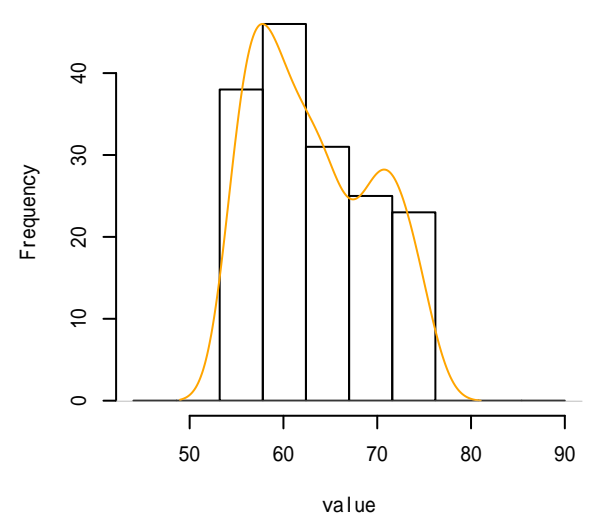

FEMALE Sys.BP Included

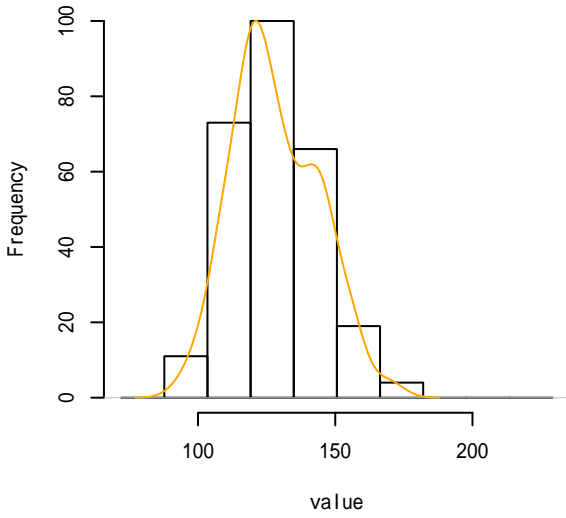

FEMALE Sys.BP Excluded by Med.  
p-val= 1.08e-06

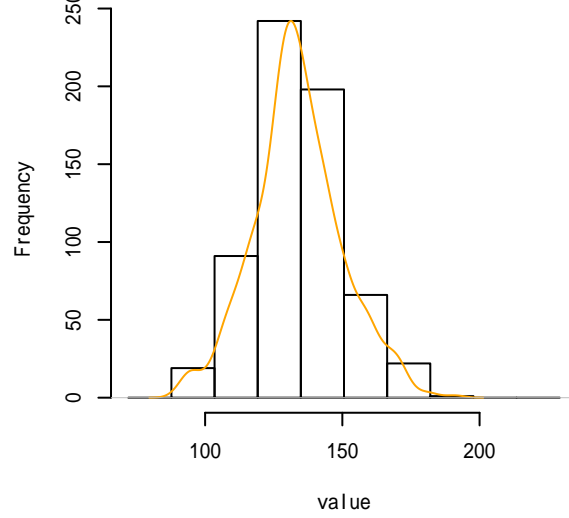

FEMALE Sys.BP Excluded by 1 visit  
pval= 0.41038

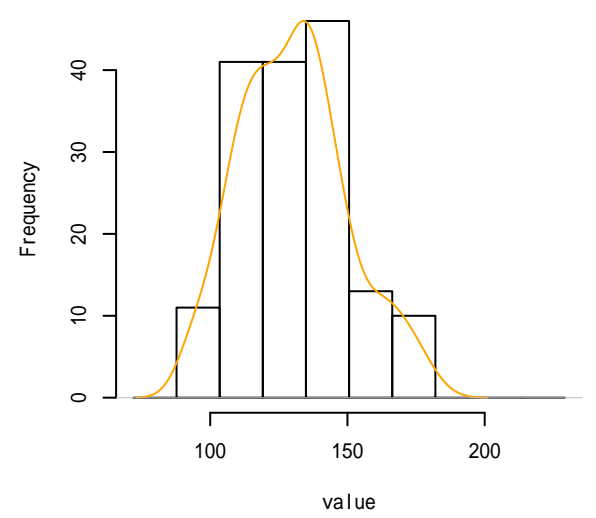

FEMALE Dia.BP Included

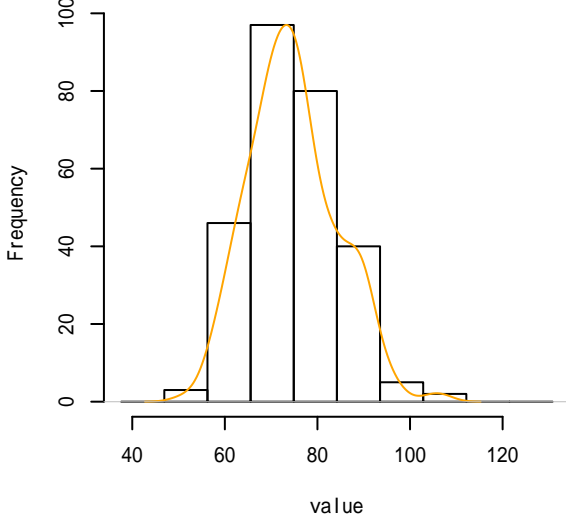

FEMALE Dia.BP Excluded by Med.  
p-val= 0.0072

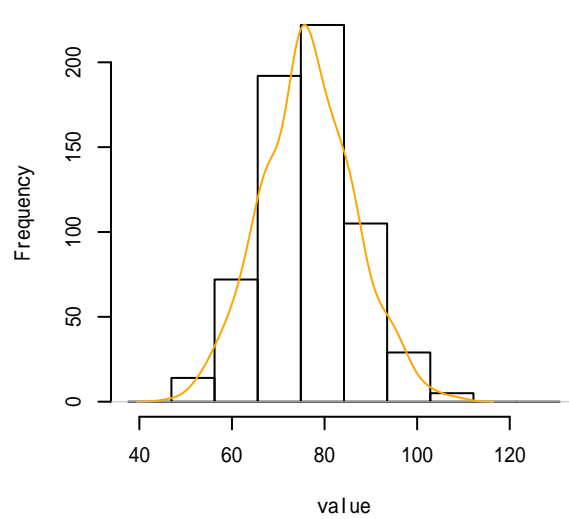

FEMALE Dia.BP Excluded by 1 visit  
pval= 0.42736

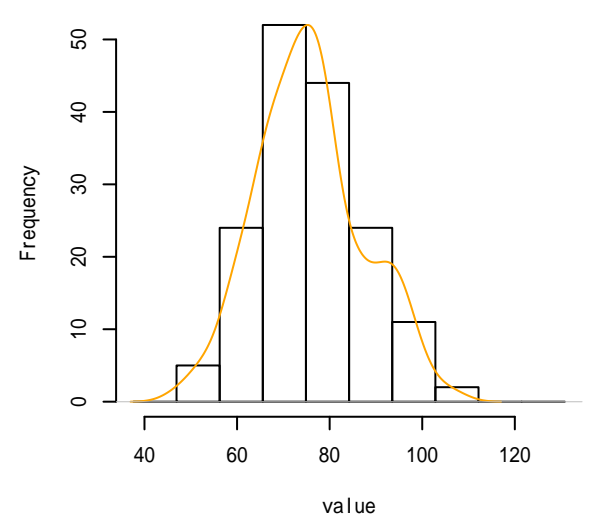

FEMALE PWV Included

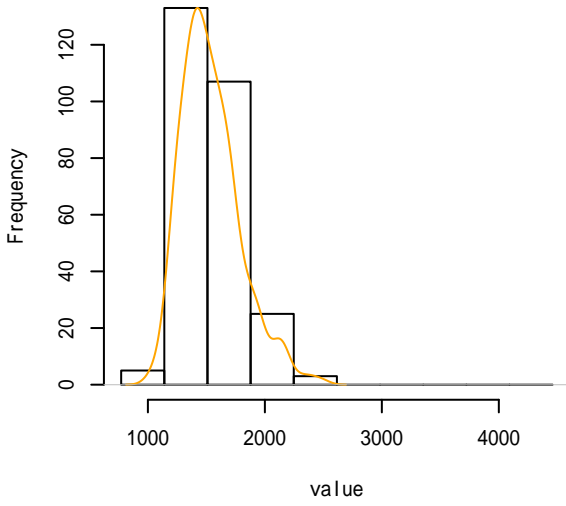

FEMALE PWV Excluded by Med.  
p-val= LessThan1.0E-10

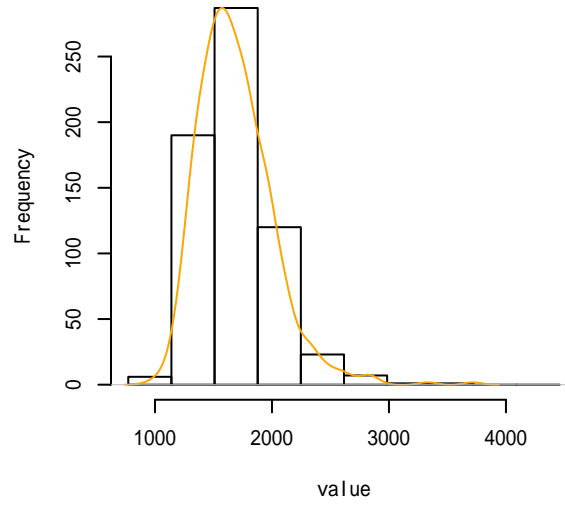

FEMALE PWV Excluded by 1 visit  
pval= 0.04405

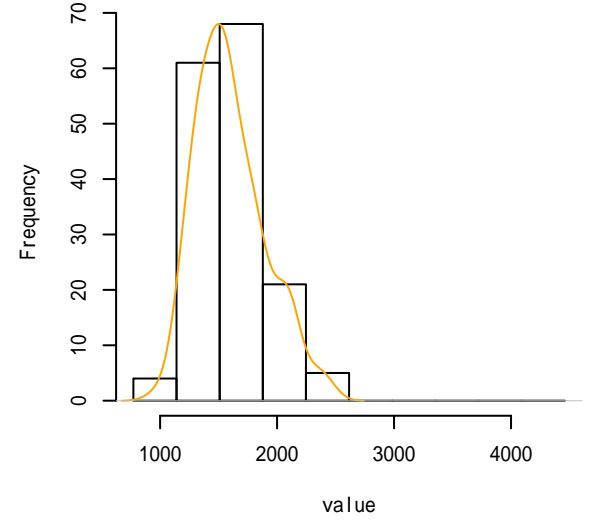

FEMALE ABI Included

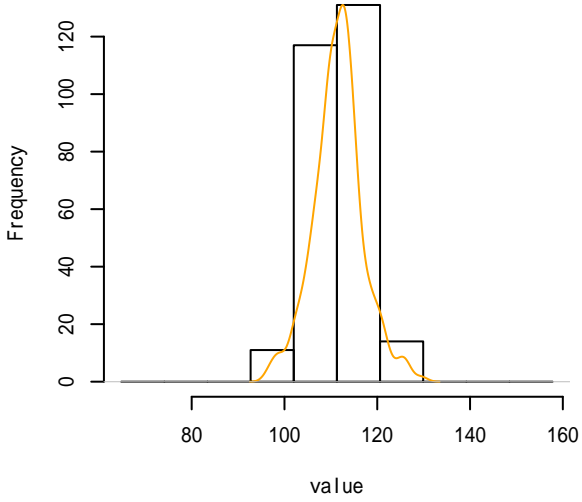

FEMALE ABI Excluded by Med.  
p-val= 0.59373

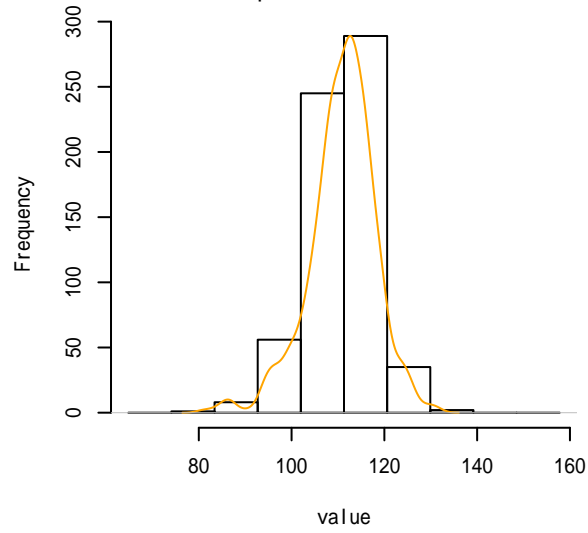

FEMALE ABI Excluded by 1 visit  
pval= 0.06589

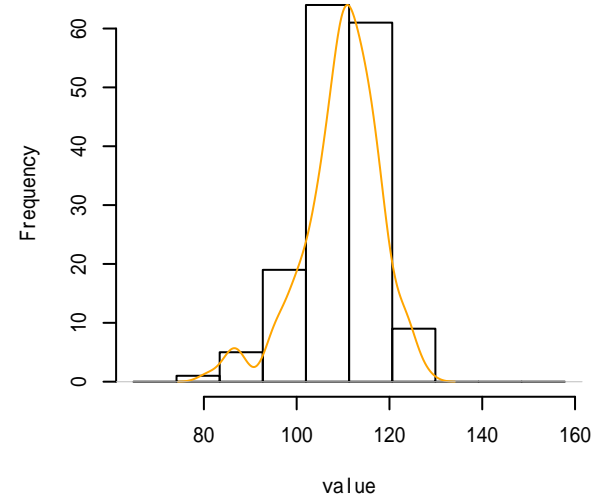

FEMALE BD(Acoustic) Included

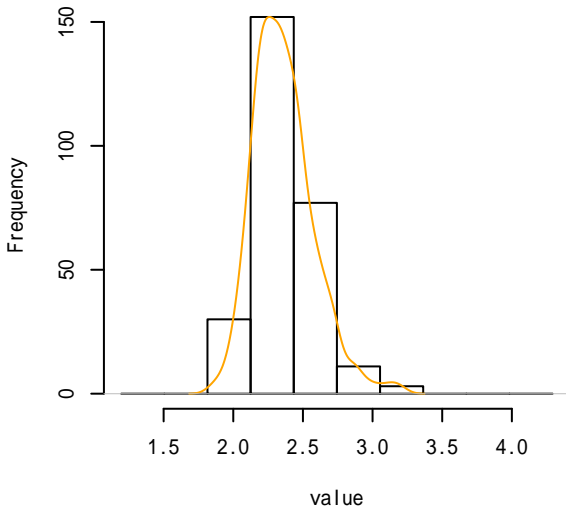

FEMALE BD(Acoustic) Excluded by Med.  
p-val= 0.54988

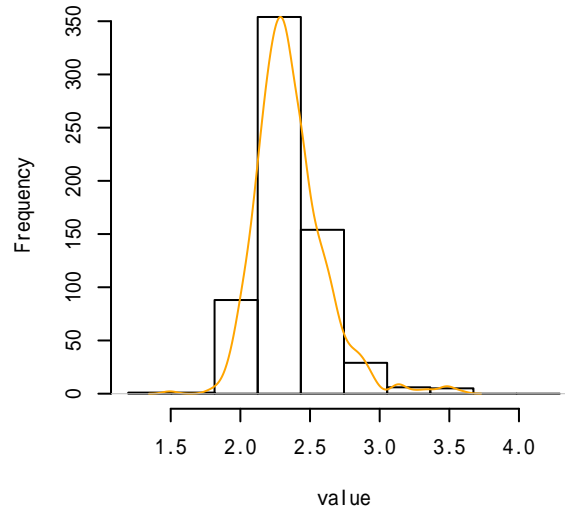

FEMALE BD(Acoustic) Excluded by 1 visit  
pval= 0.35752

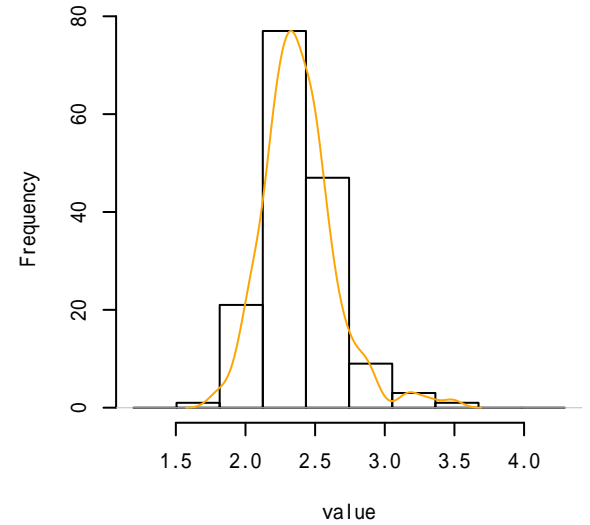

FEMALE BD(Zscore) Included

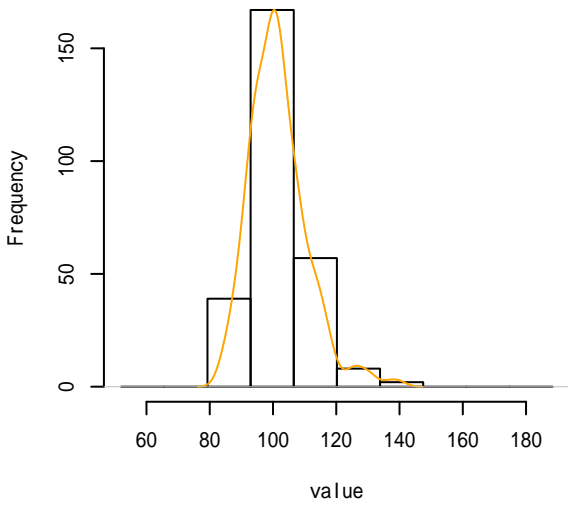

FEMALE BD(Zscore) Excluded by Med.  
p-val= 0.01638

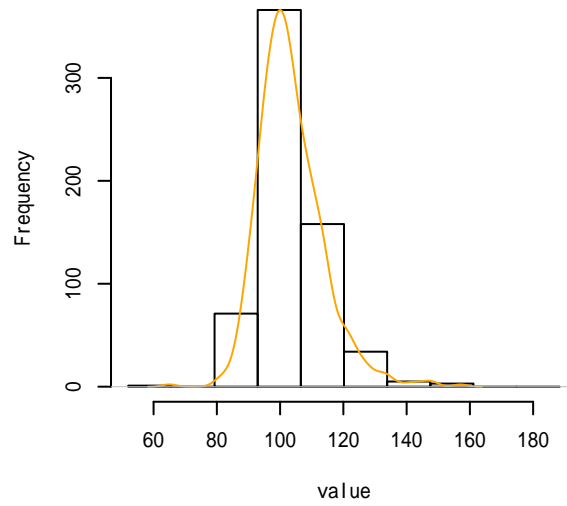

FEMALE BD(Zscore) Excluded by 1 visit  
pval= 0.11167

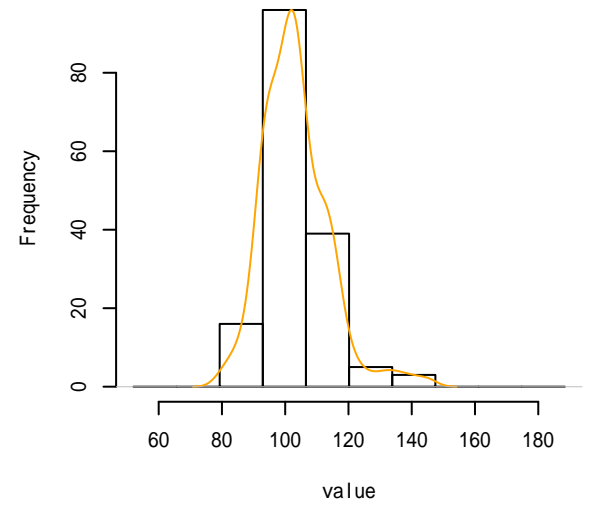

FEMALE BD(Tscore) Included

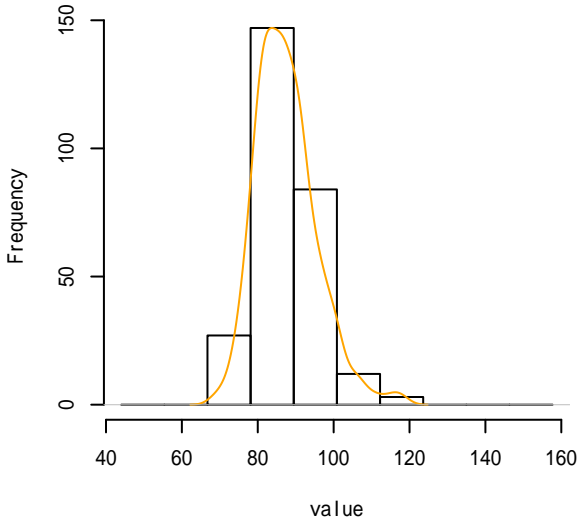

FEMALE BD(Tscore) Excluded by Med.  
p-val= 0.51588

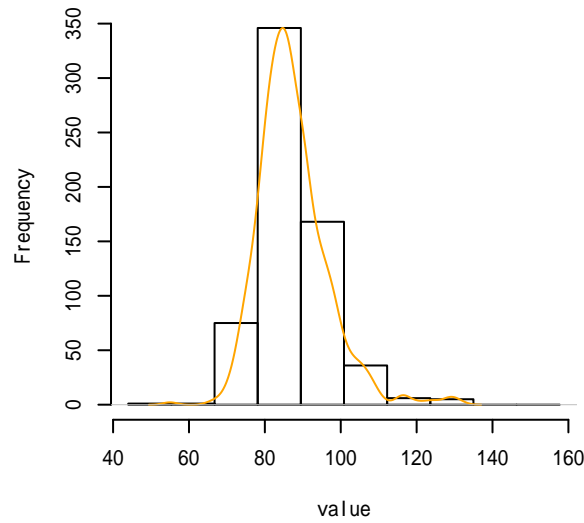

FEMALE BD(Tscore) Excluded by 1 visit  
pval= 0.37783

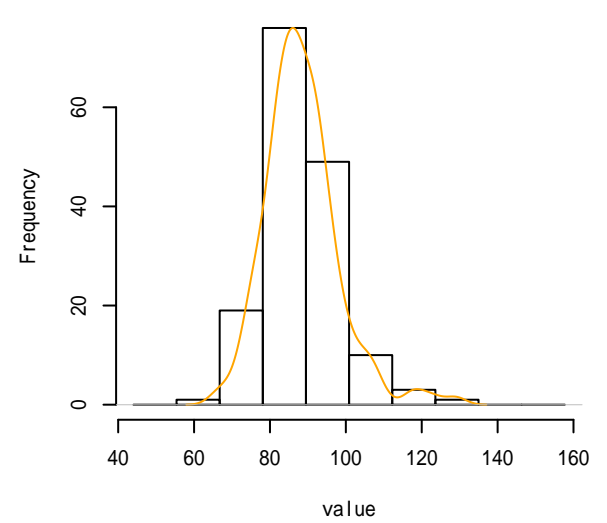

FEMALE Glucose Included

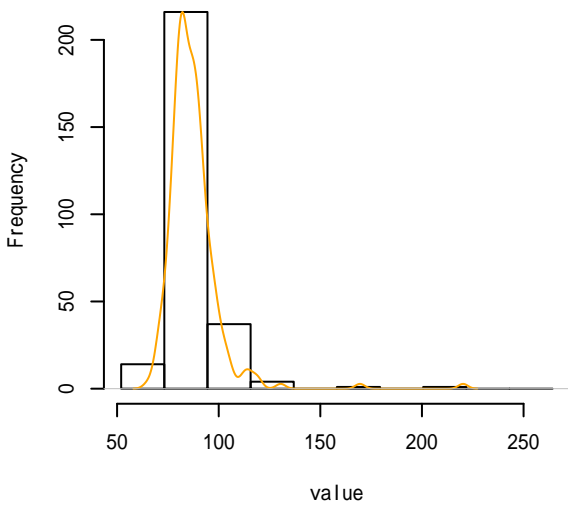

FEMALE Glucose Excluded by Med.  
p-val= 0.001

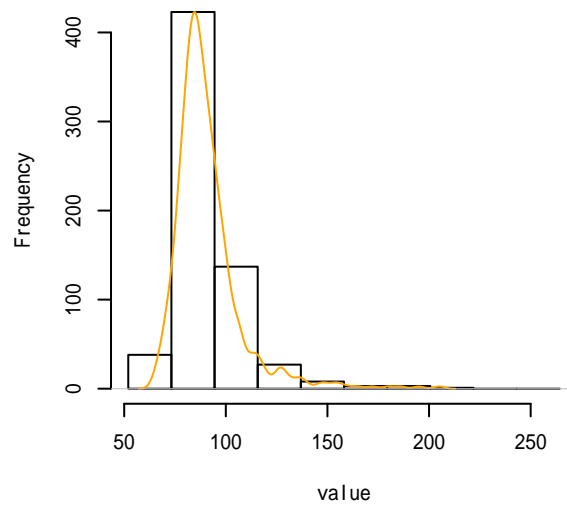

FEMALE Glucose Excluded by 1 visit  
pval= 0.5978

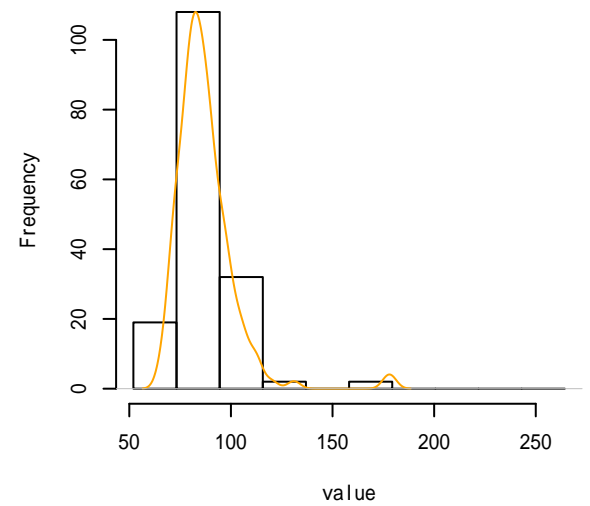



FEMALE HbA1c Included

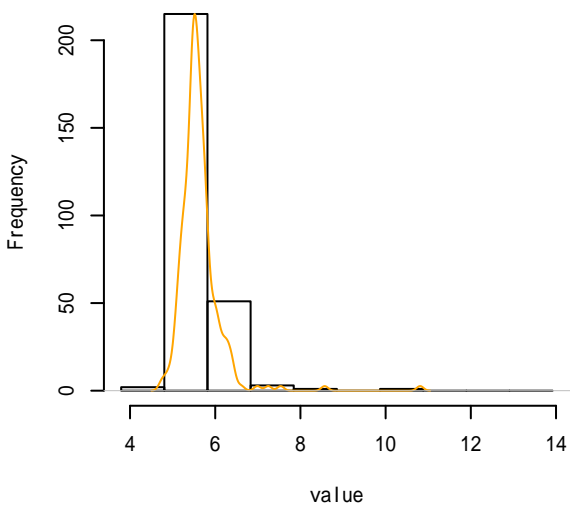

FEMALE HbA1c Excluded by Med.  
p-val= 0.00592

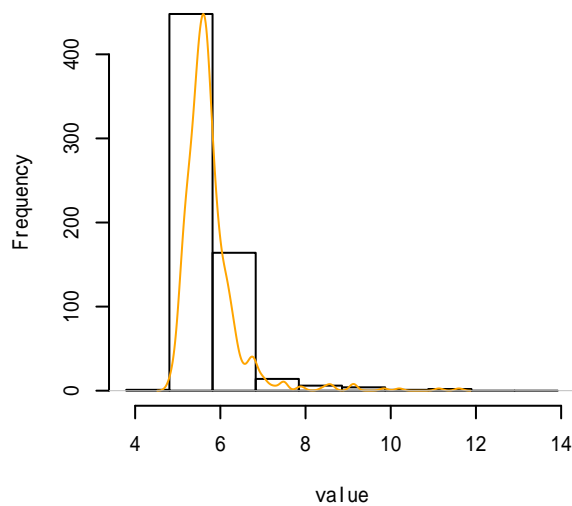

FEMALE HbA1c Excluded by 1 visit  
pval= 0.20674

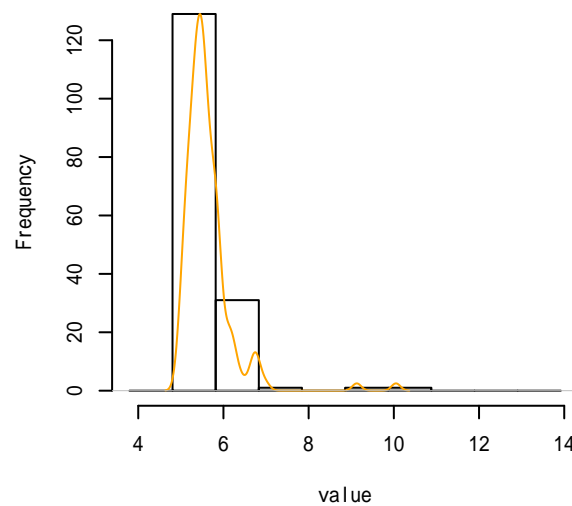

FEMALE Muscle Included

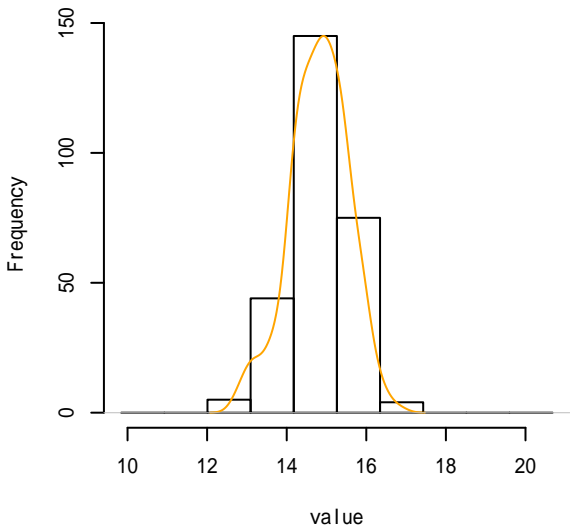

FEMALE Muscle Excluded by Med.  
p-val= 0.00042

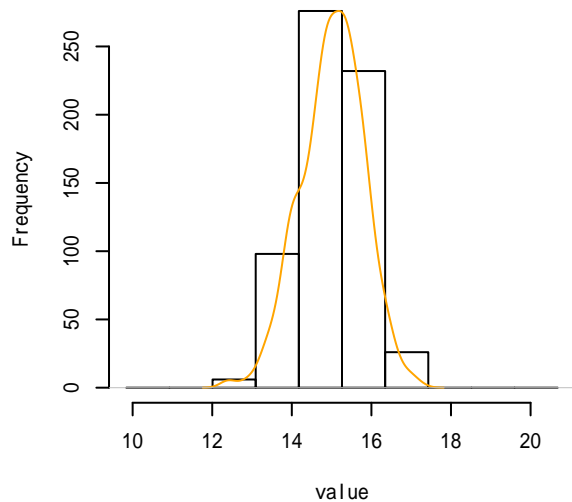

FEMALE Muscle Excluded by 1 visit  
pval= 0.23904

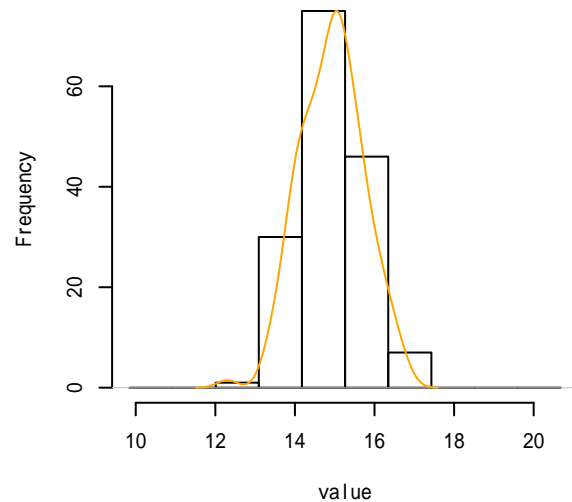

FEMALE WBC Included

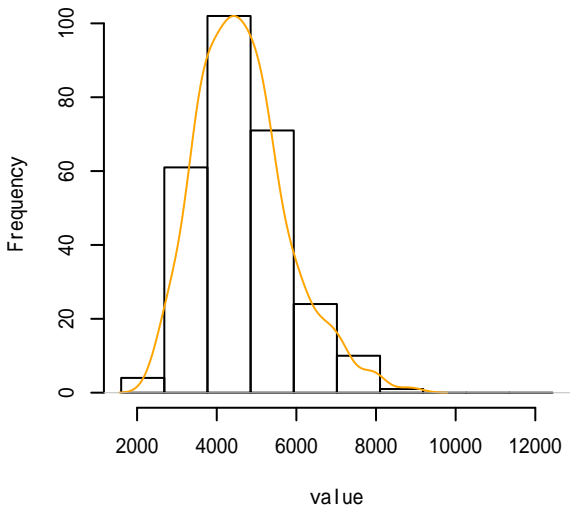

FEMALE WBC Excluded by Med.  
p-val= 0.3901

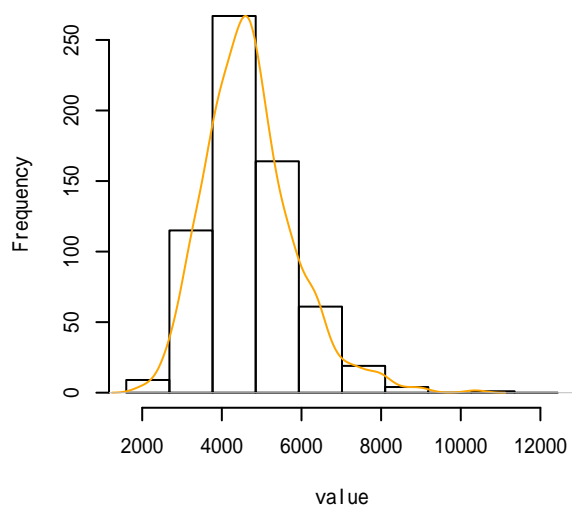

FEMALE WBC Excluded by 1 visit  
pval= 0.92957

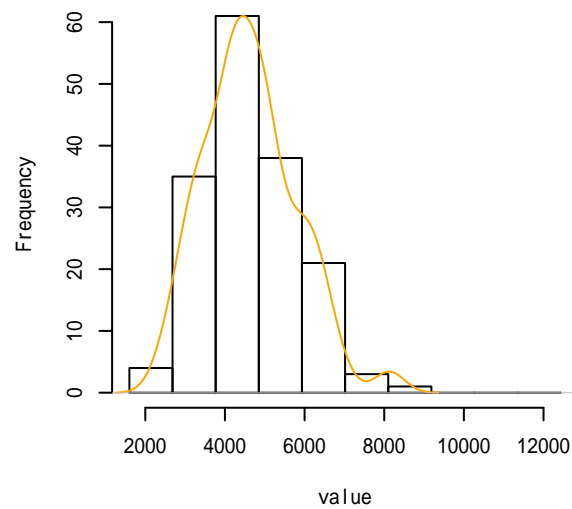

FEMALE RBC Included

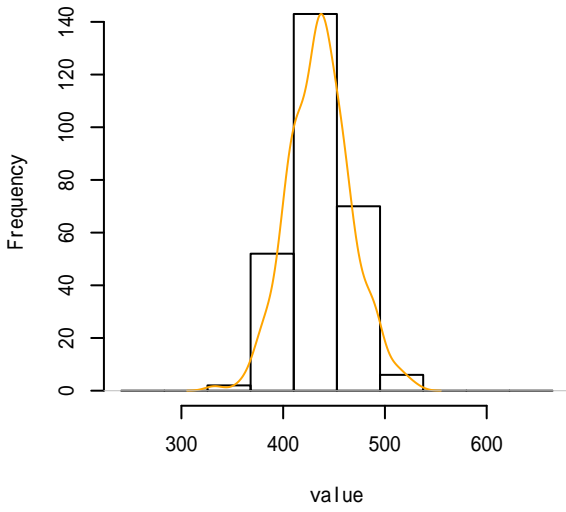

FEMALE RBC Excluded by Med.  
p-val= 0.09053

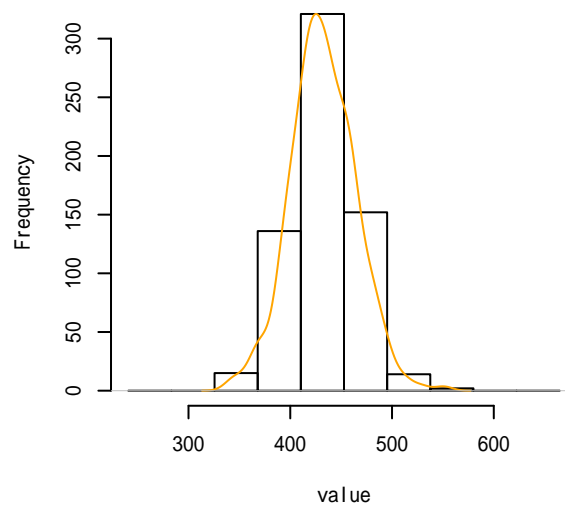

FEMALE RBC Excluded by 1 visit  
pval= 0.77372

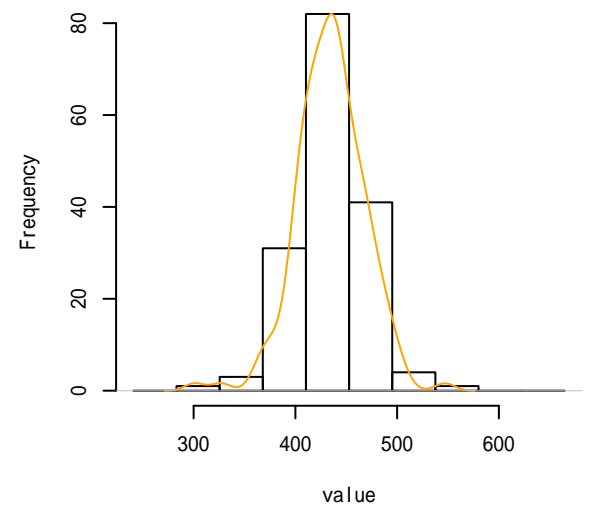

FEMALE Hemoglobin Included

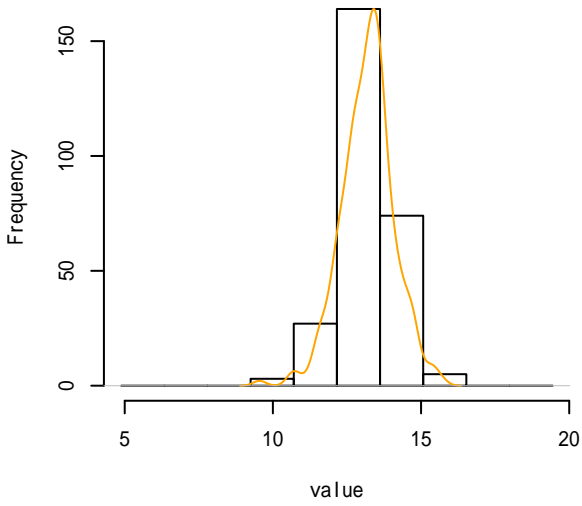

FEMALE Hemoglobin Excluded by Med.  
p-val= 0.13418

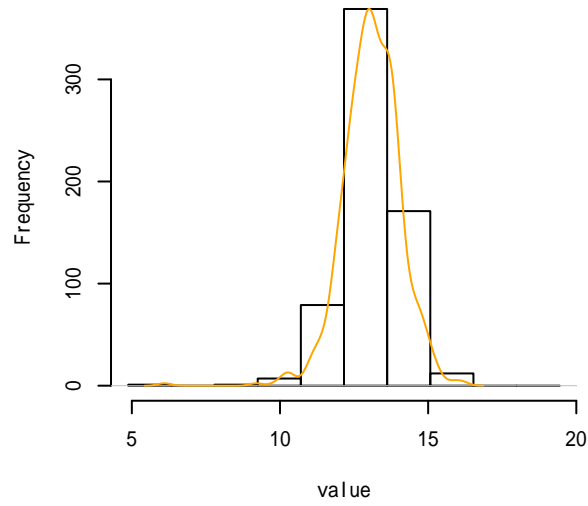

FEMALE Hemoglobin Excluded by 1 visit  
pval= 0.64637

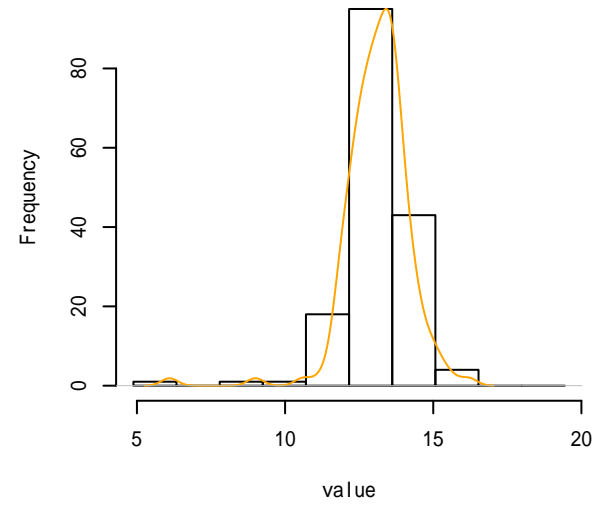

FEMALE Hematocrit Included

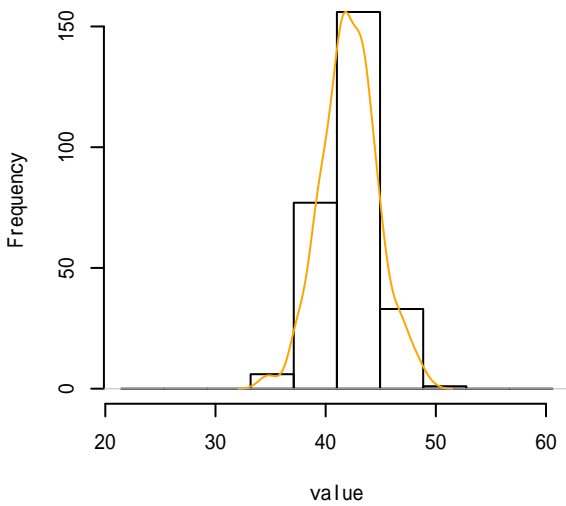

FEMALE Hematocrit Excluded by Med.  
p-val= 0.04437

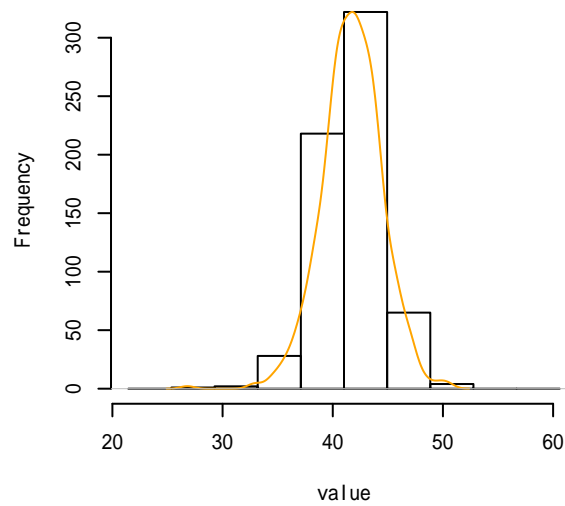

FEMALE Hematocrit Excluded by 1 visit  
pval= 0.50656

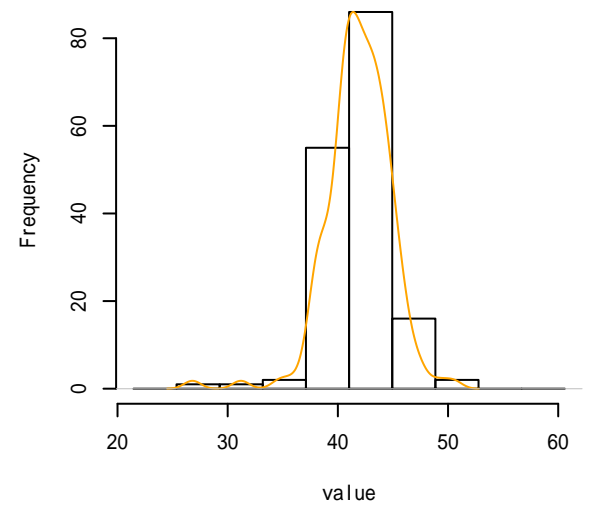

FEMALE MCV Included

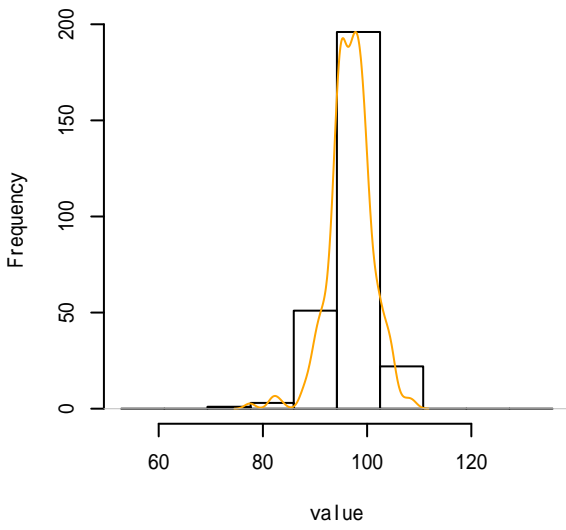

FEMALE MCV Excluded by Med.  
p-val= 0.78493

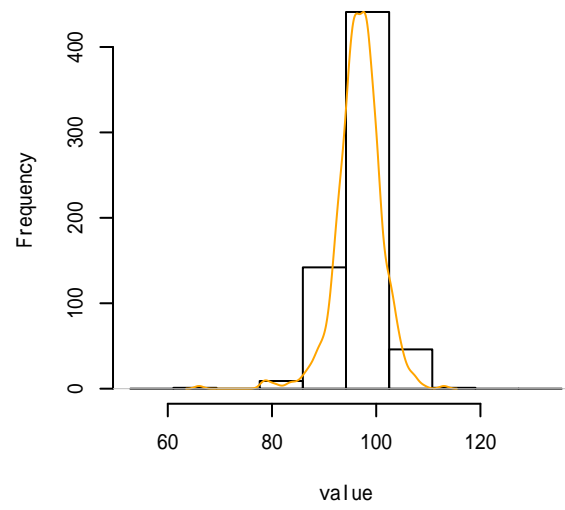

FEMALE MCV Excluded by 1 visit  
pval= 0.43967

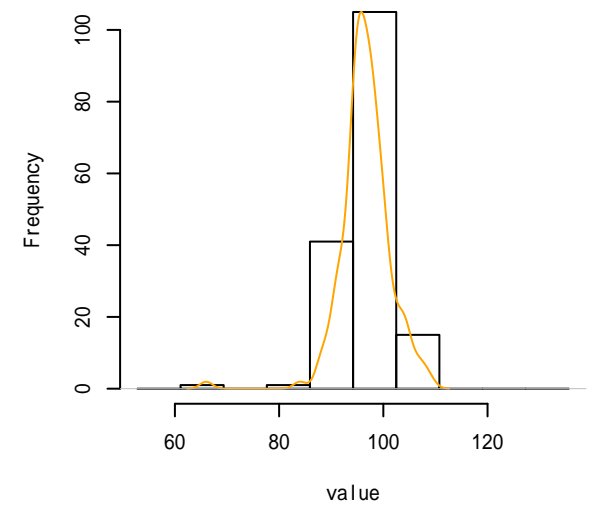

FEMALE MCH Included

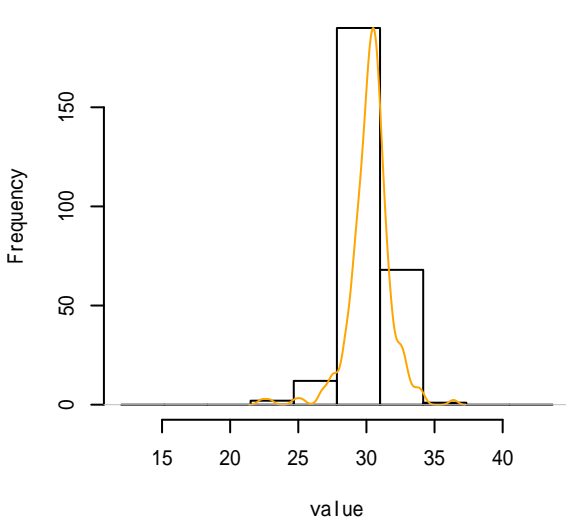

FEMALE MCH Excluded by Med.  
p-val= 0.59598

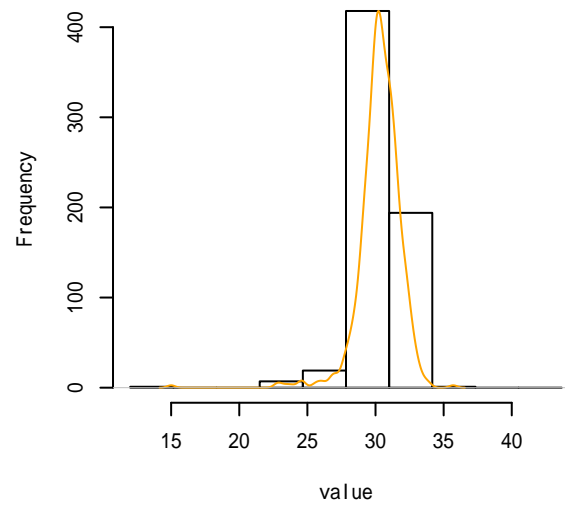

FEMALE MCH Excluded by 1 visit  
pval= 0.88413

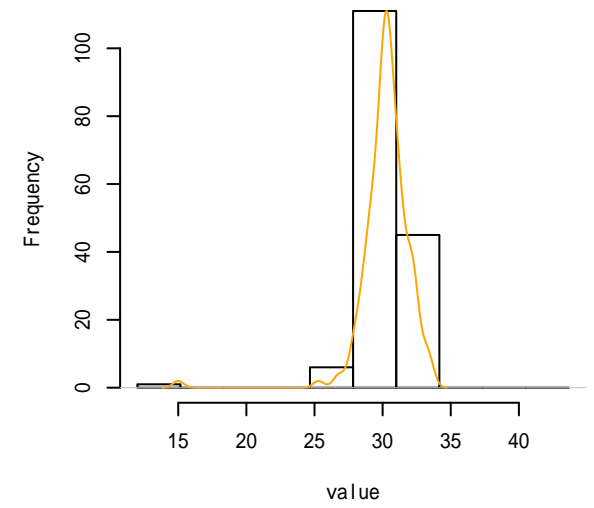

FEMALE MCHC Included

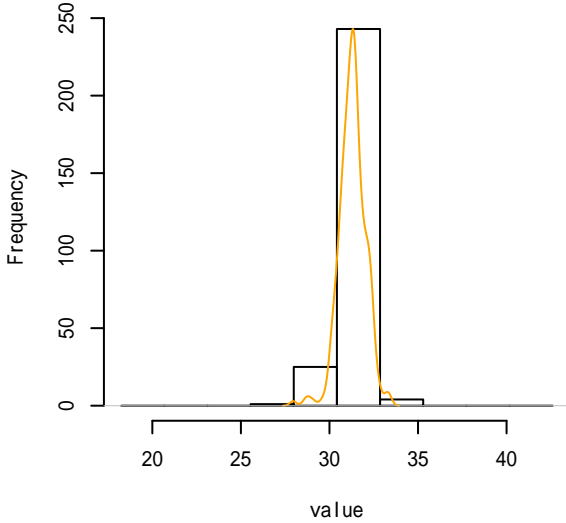

FEMALE MCHC Excluded by Med.  
p-val= 0.23714

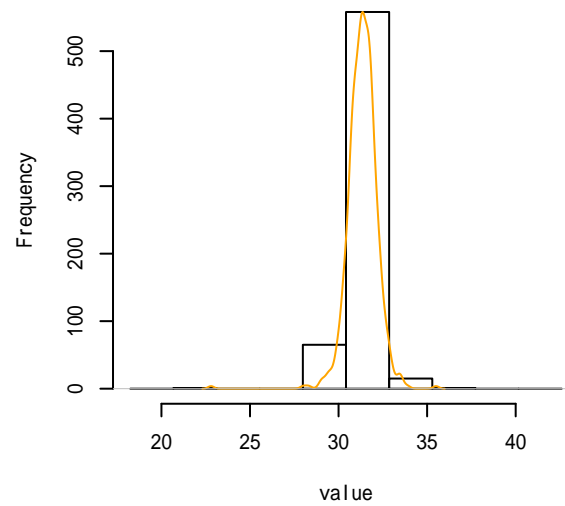

FEMALE MCHC Excluded by 1 visit  
pval= 0.55807

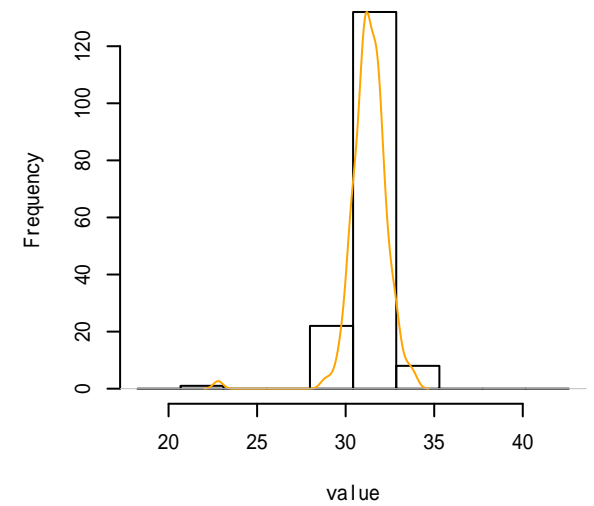

FEMALE Totalbilirubin Included

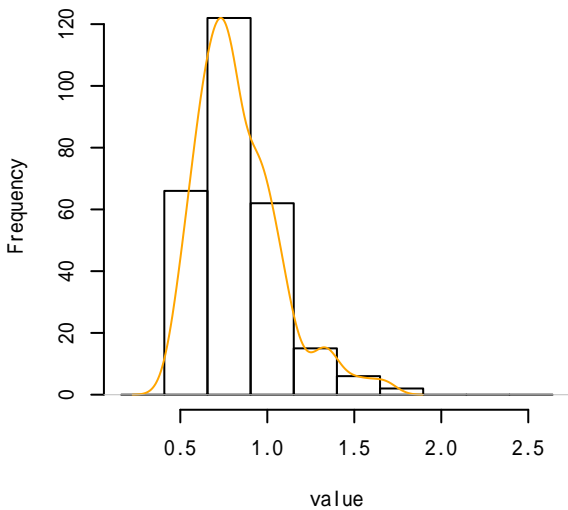

FEMALE Totalbilirubin Excluded by Med.  
p-val= 0.00355

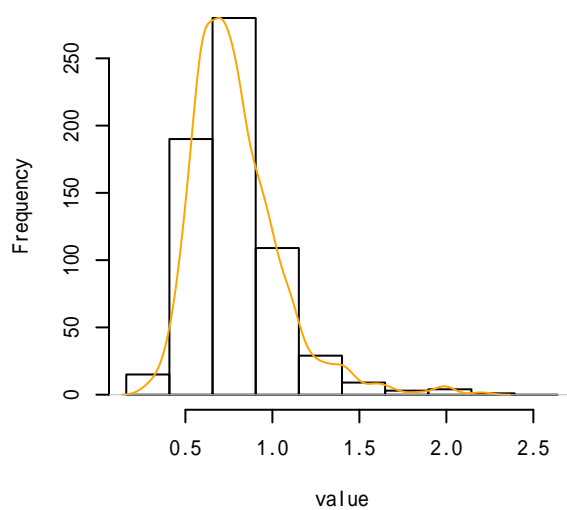

FEMALE Totalbilirubin Excluded by 1 visit  
pval= 0.02416

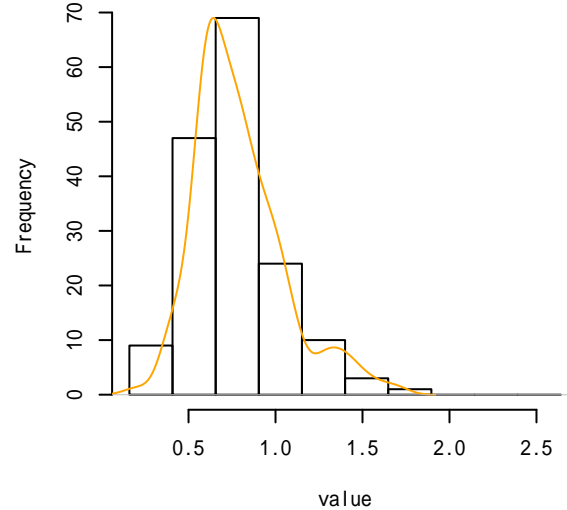

FEMALE AST Included

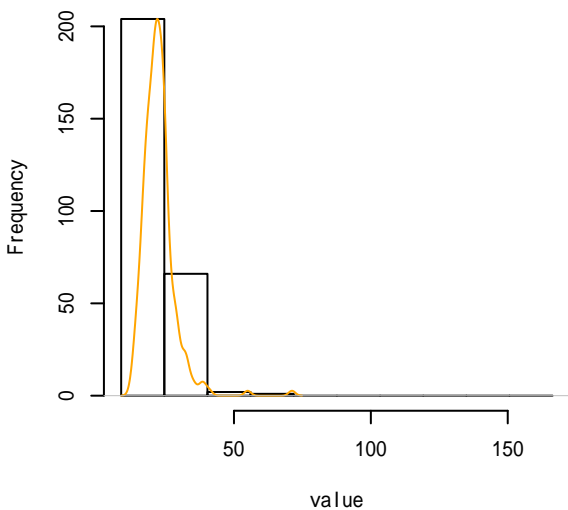

FEMALE AST Excluded by Med.  
p-val= 0.01701

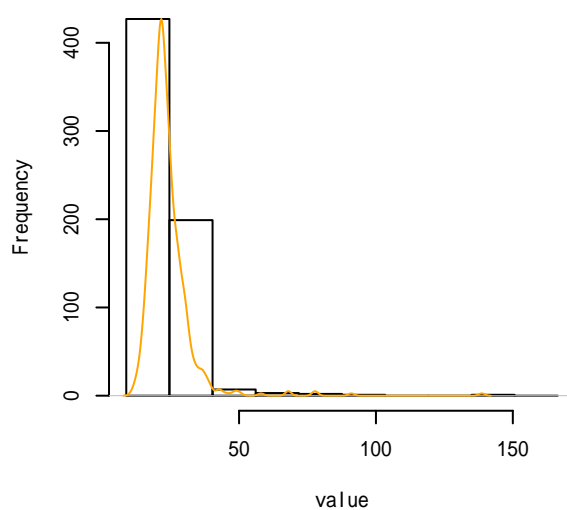

FEMALE AST Excluded by 1 visit  
pval= 0.85901

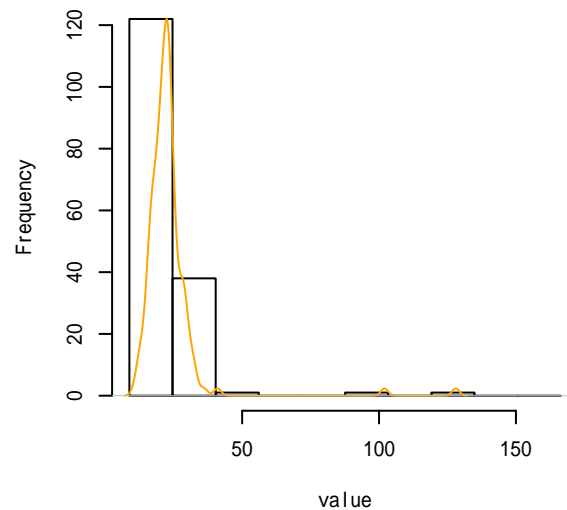

FEMALE ALT Included

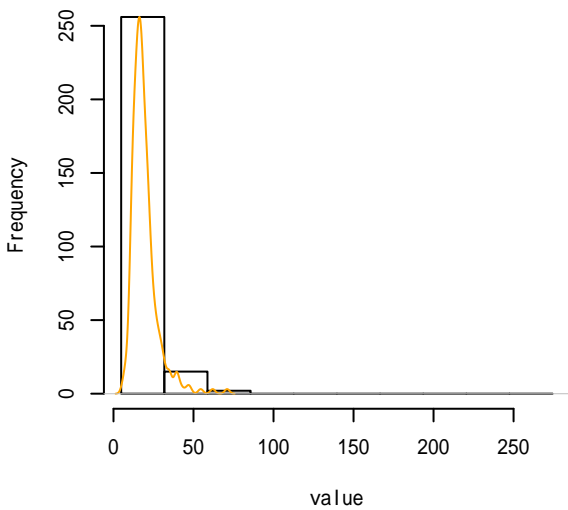

FEMALE ALT Excluded by Med.  
p-val= 0.01656

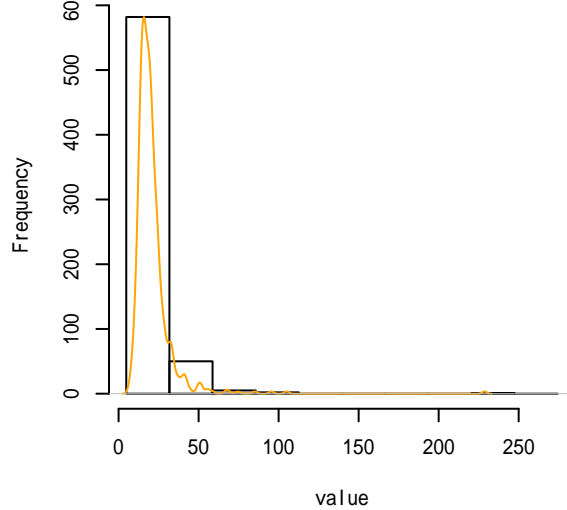

FEMALE ALT Excluded by 1 visit  
pval= 0.923

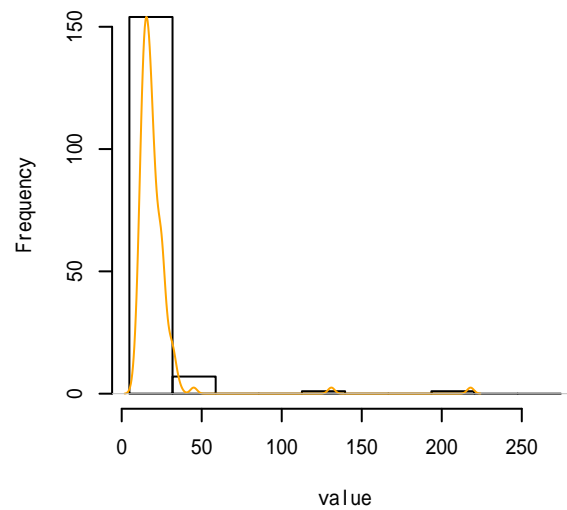

FEMALE TotalProtein Included

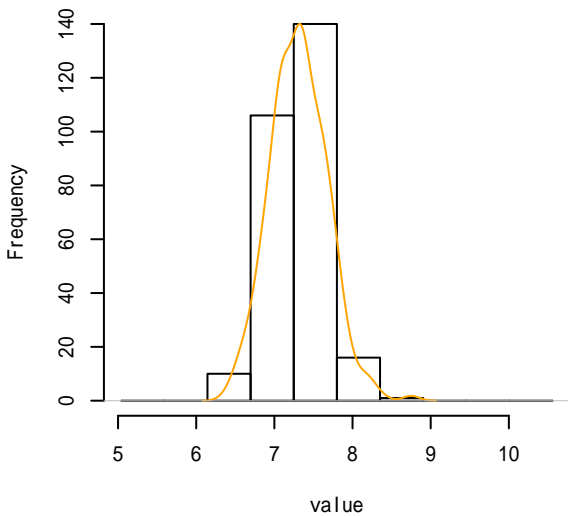

FEMALE TotalProtein Excluded by Med.  
p-val= 0.05125

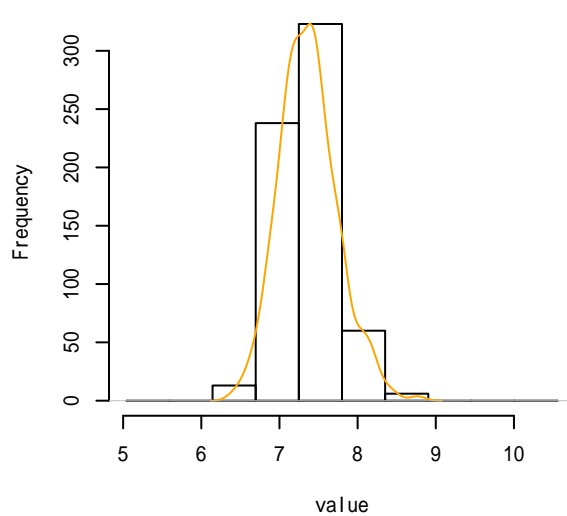

FEMALE TotalProtein Excluded by 1 visit  
pval= 0.52848

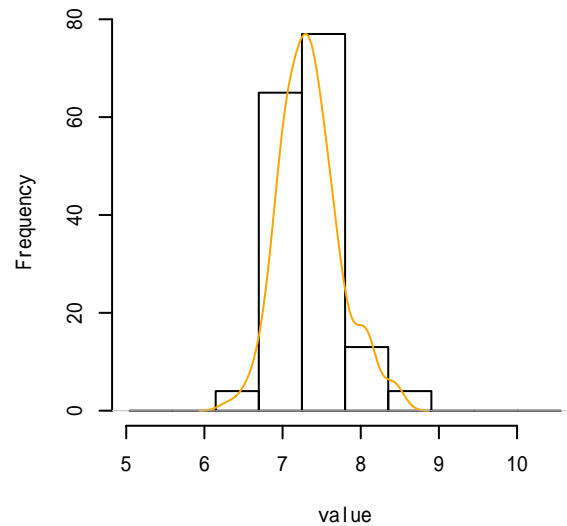

FEMALE ALB Included

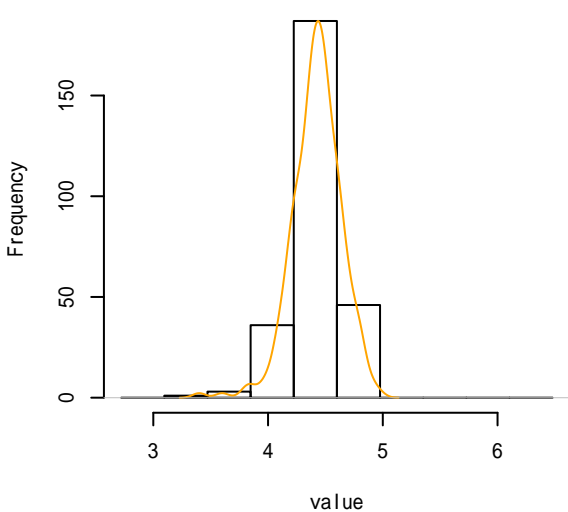

FEMALE ALB Excluded by Med.  
p-val= 0.19936

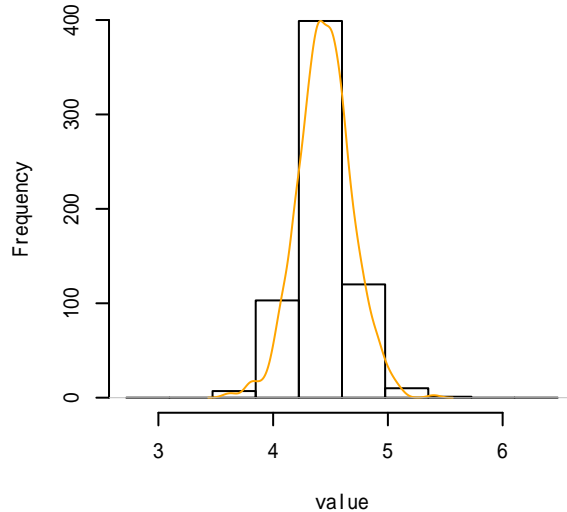

FEMALE ALB Excluded by 1 visit  
pval= 0.50836

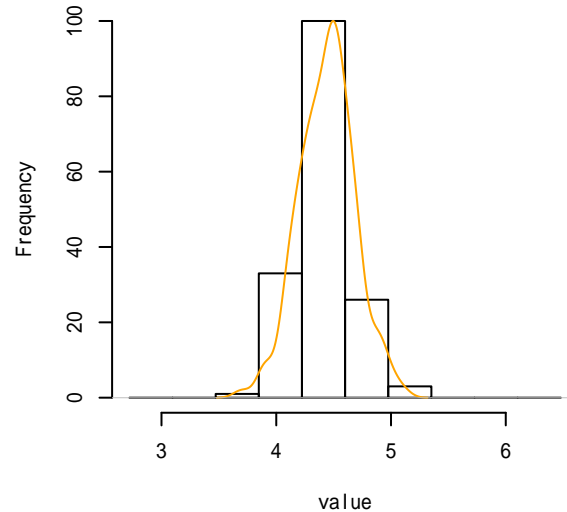

FEMALE Creatinine Included

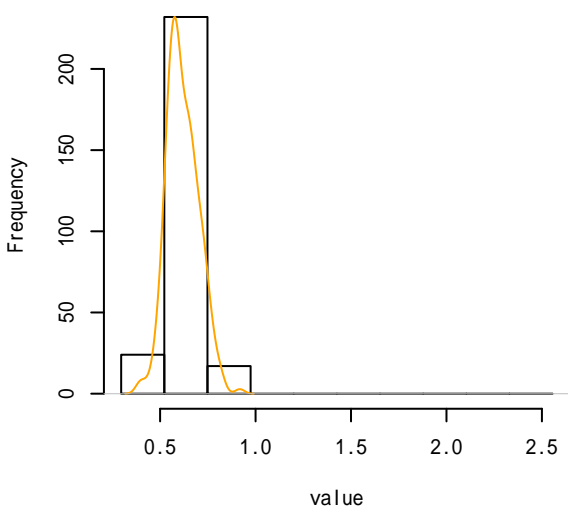

FEMALE Creatinine Excluded by Med.  
p-val= 0.13655

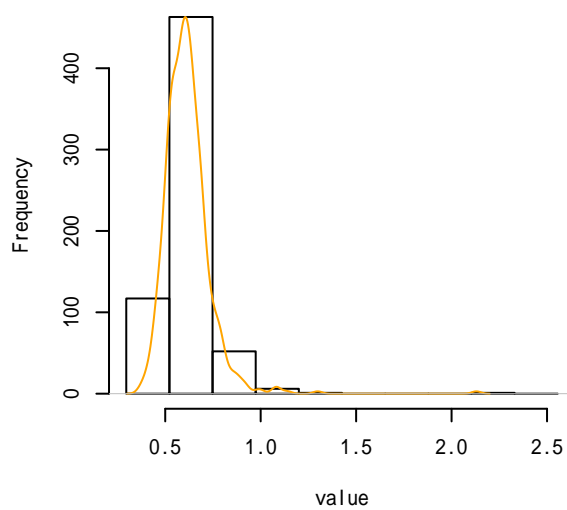

FEMALE Creatinine Excluded by 1 visit  
pval= 0.39157

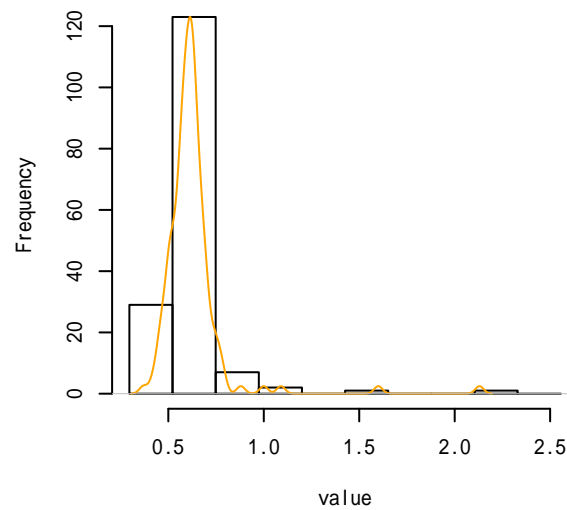

FEMALE UreaNitrogen Included

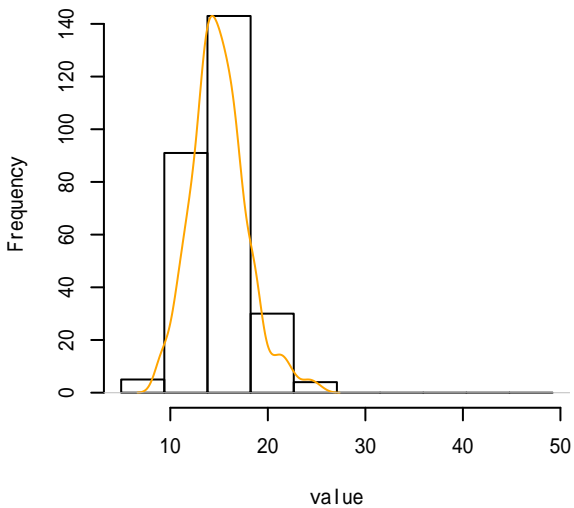

FEMALE UreaNitrogen Excluded by Med.  
p-val= 0.0557

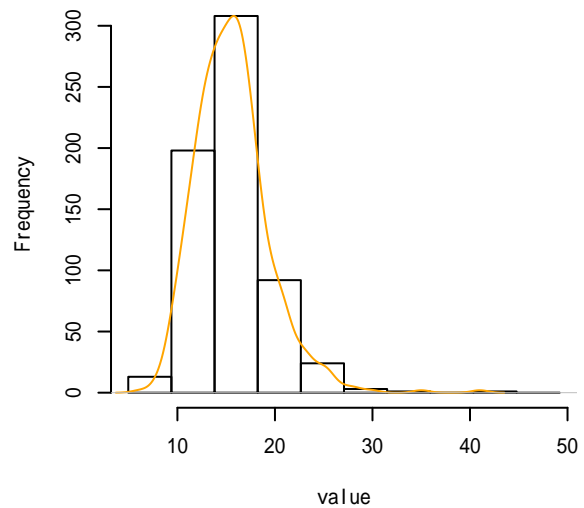

FEMALE UreaNitrogen Excluded by 1 visit  
pval= 0.87361

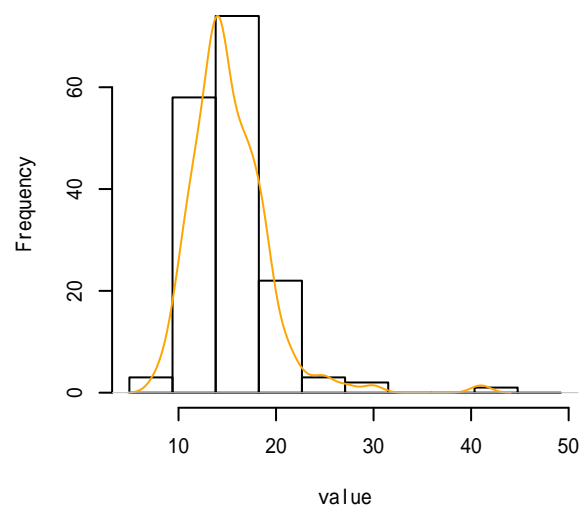

FEMALE UricAcid Included

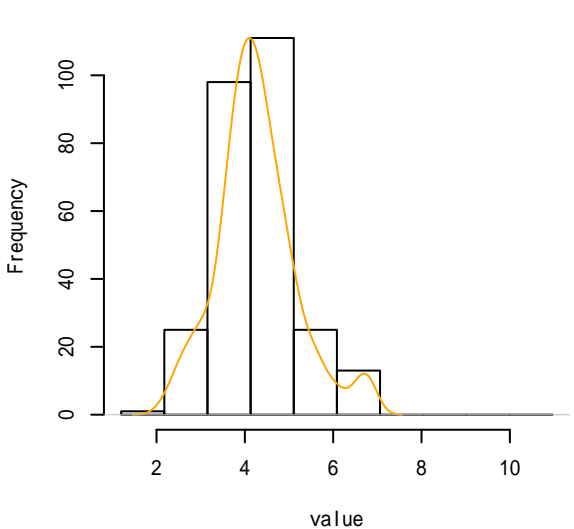

FEMALE UricAcid Excluded by Med.  
p-val= 0.11718

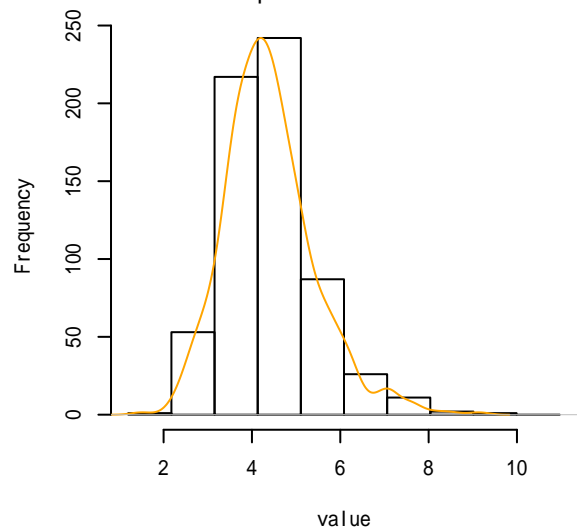

FEMALE UricAcid Excluded by 1 visit  
pval= 0.44554

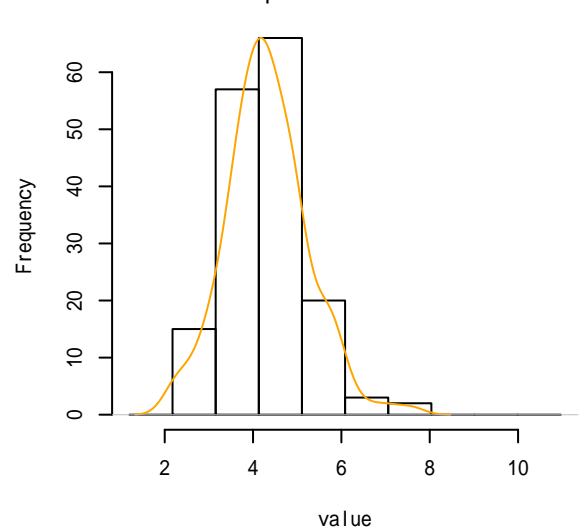

FEMALE TotalCholesterol Included

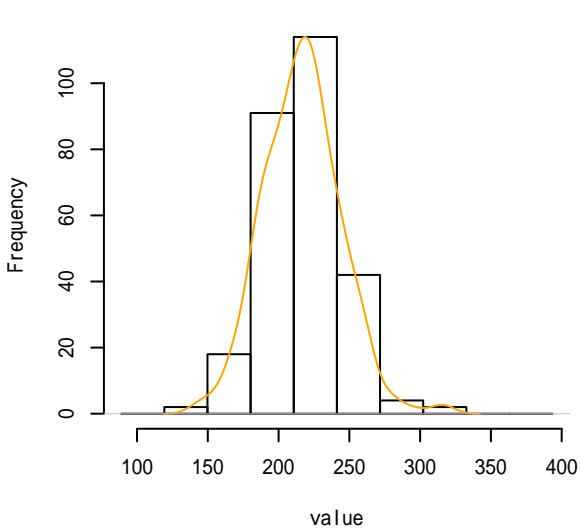

FEMALE TotalCholesterol Excluded by Med.  
p-val= 0.00989

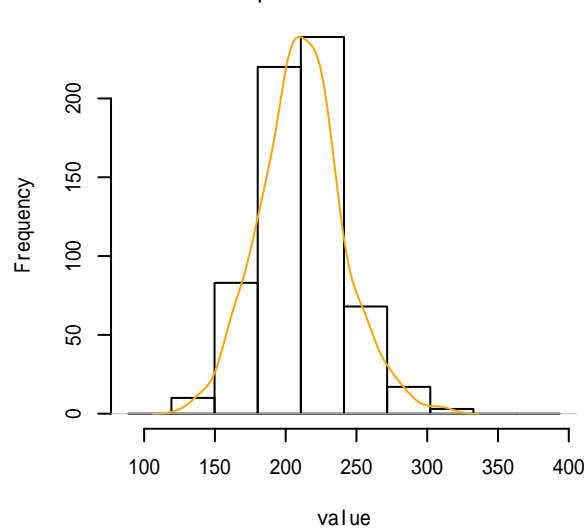

FEMALE TotalCholesterol Excluded by 1 visit  
pval= 0.2141

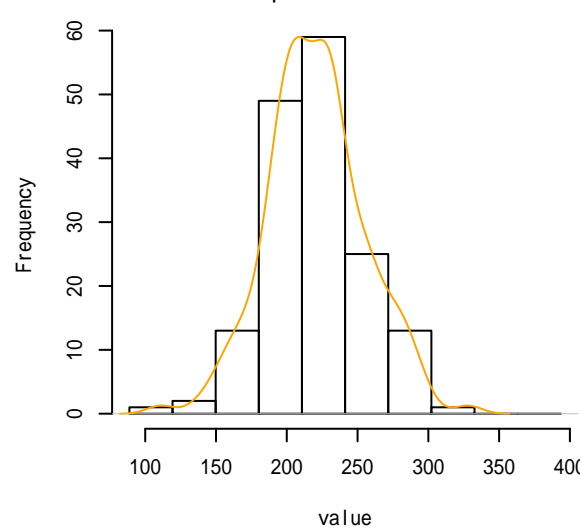

FEMALE TG Included

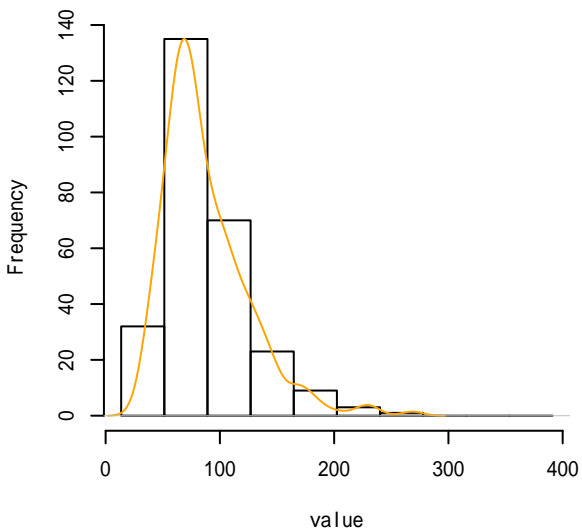

FEMALE TG Excluded by Med.  
p-val= 0.6252

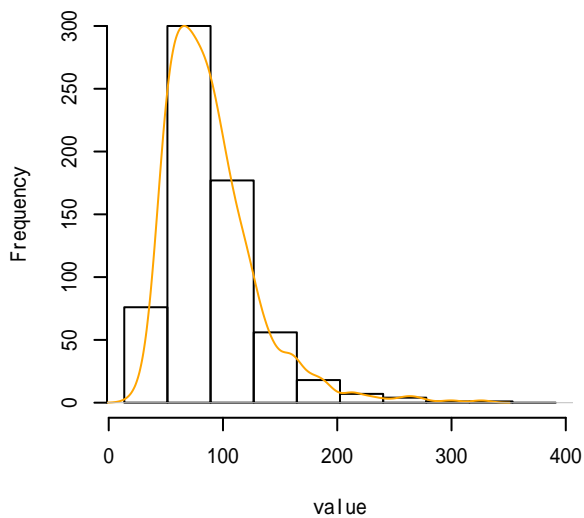

FEMALE TG Excluded by 1 visit  
pval= 0.22173

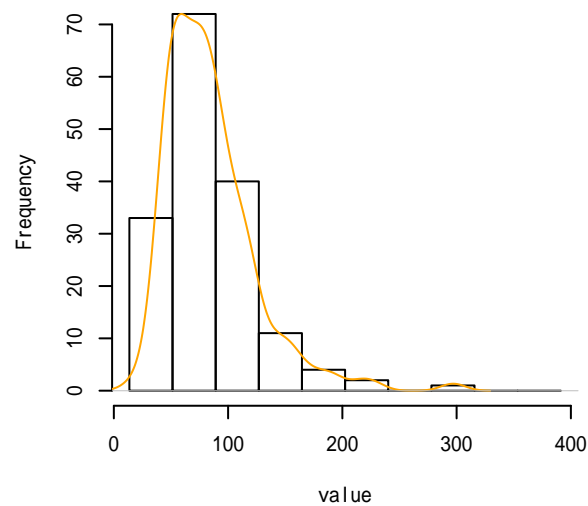

FEMALE HDL Included

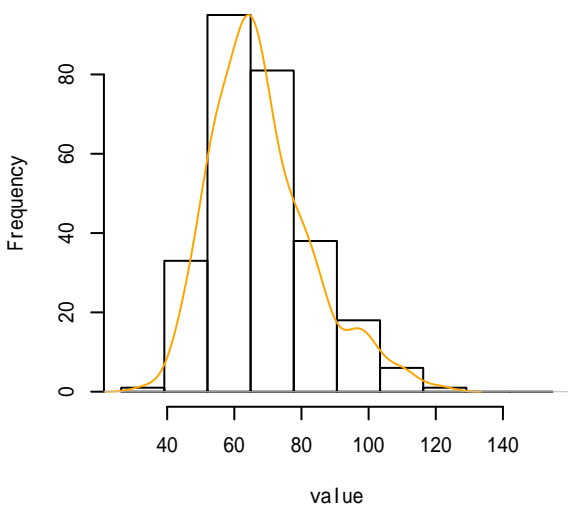

FEMALE HDL Excluded by Med.  
p-val= 0.14085

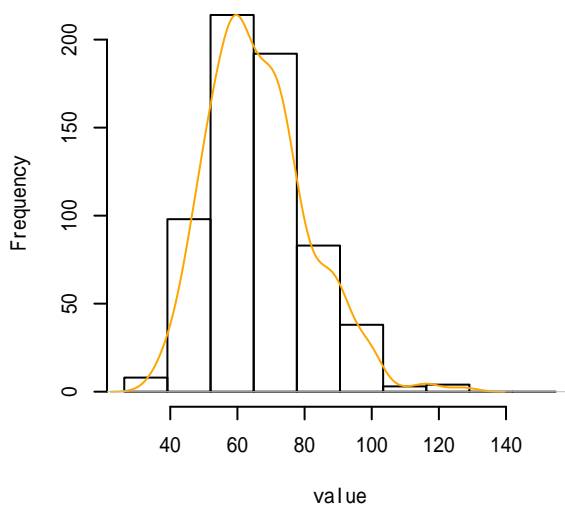

FEMALE HDL Excluded by 1 visit  
pval= 0.93488

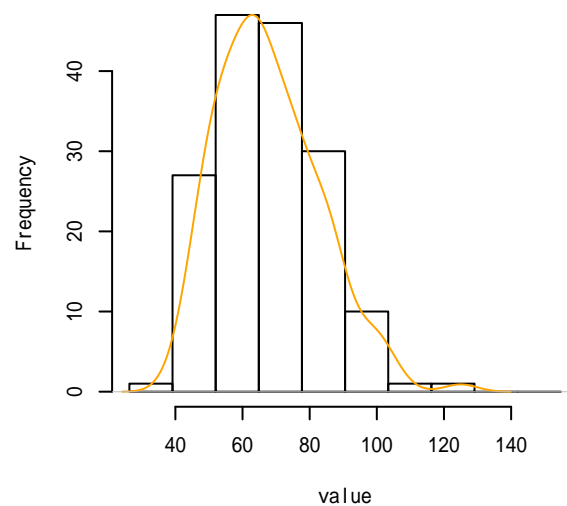

FEMALE LDL Included

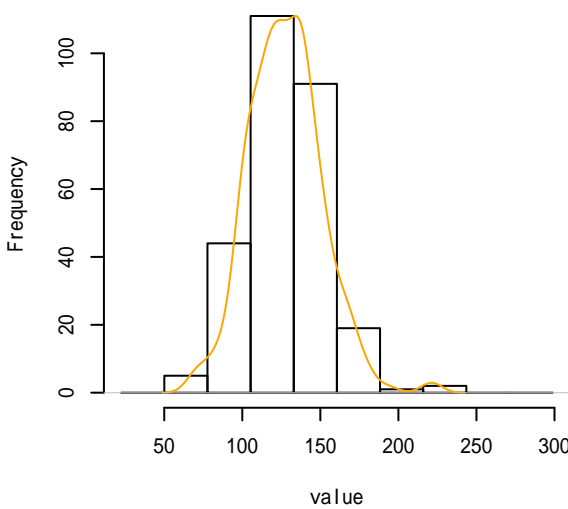

FEMALE LDL Excluded by Med.  
p-val= 0.03368

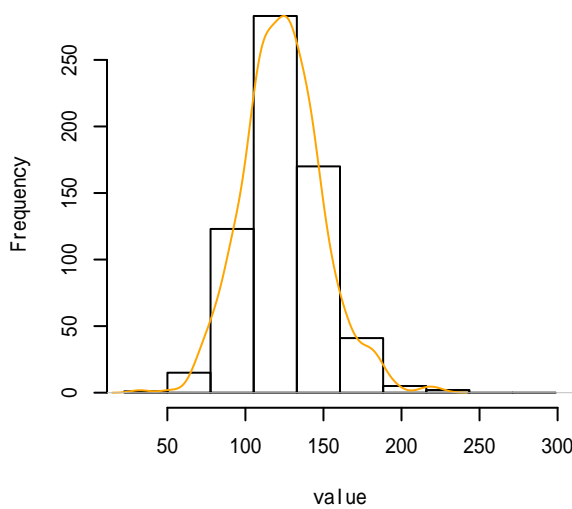

FEMALE LDL Excluded by 1 visit  
pval= 0.04744

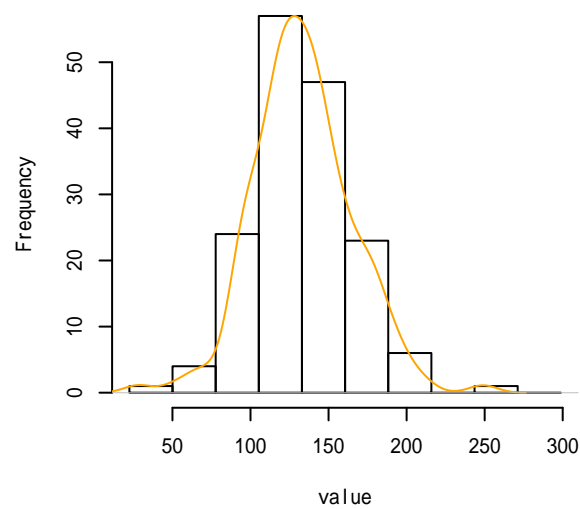

FEMALE Sodium Included

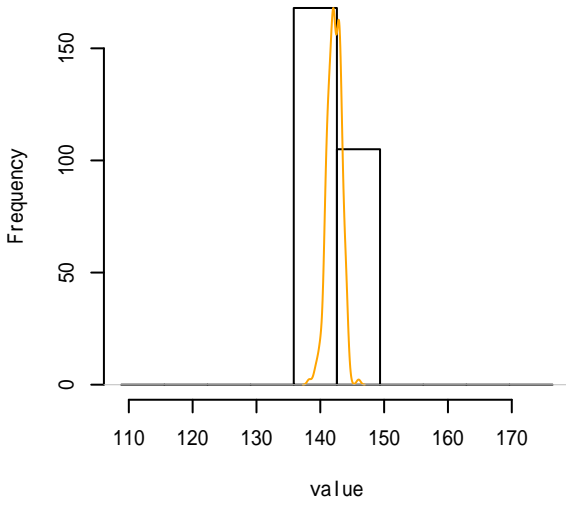

FEMALE Sodium Excluded by Med.  
p-val= 0.10467

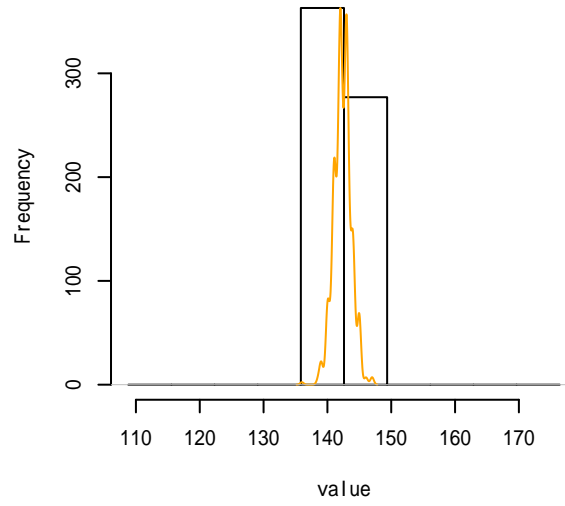

FEMALE Sodium Excluded by 1 visit  
pval= 0.30033

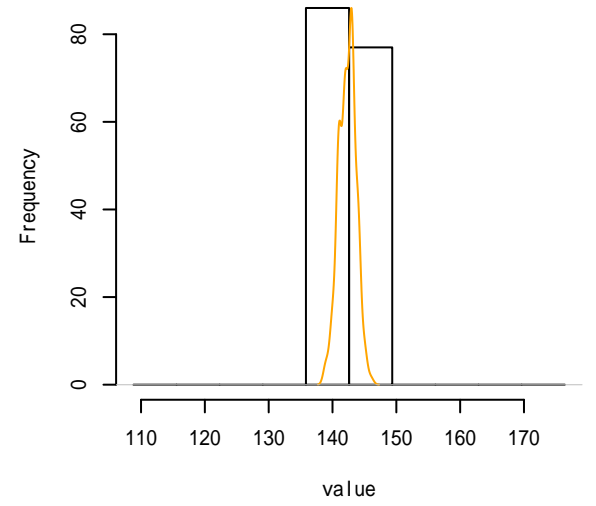

FEMALE Potassium Included

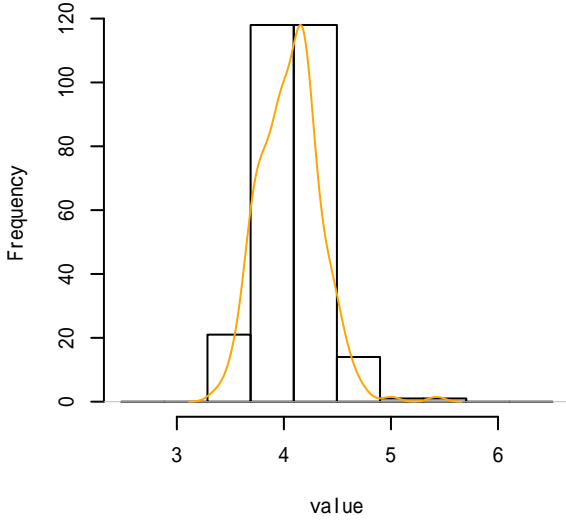

FEMALE Potassium Excluded by Med.  
p-val= 0.07038

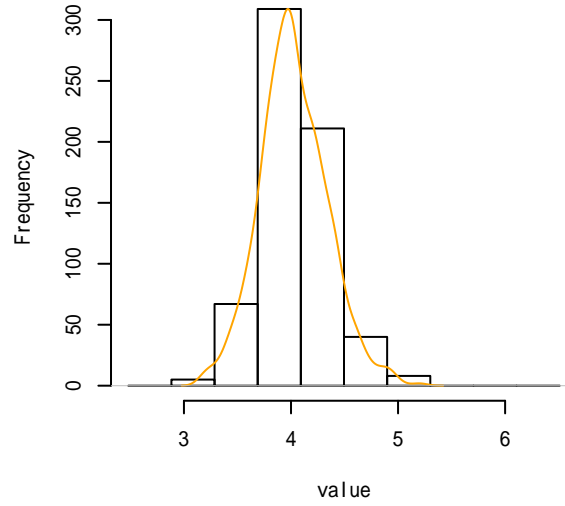

FEMALE Potassium Excluded by 1 visit  
pval= 0.28355

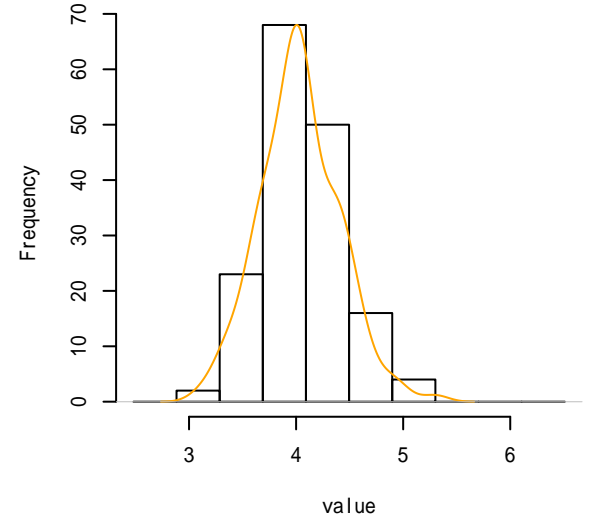

FEMALE Chlorine Included

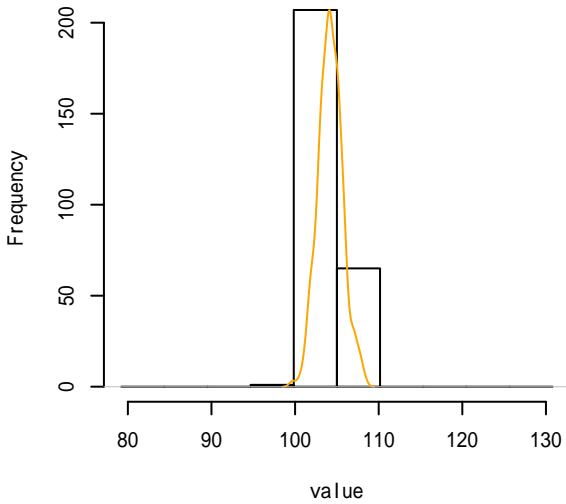

FEMALE Chlorine Excluded by Med.  
p-val= 0.25285

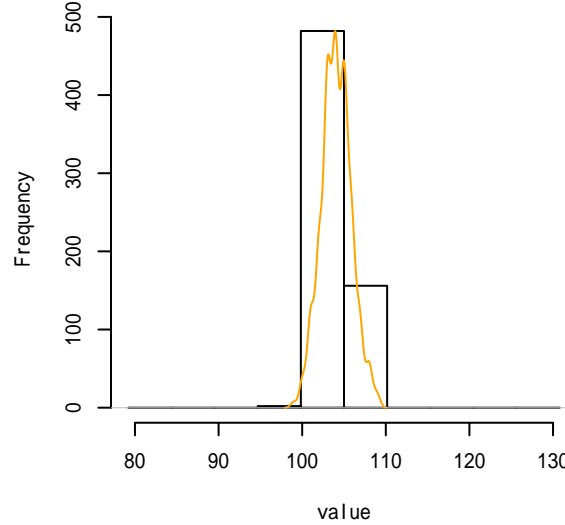

FEMALE Chlorine Excluded by 1 visit  
pval= 0.07749

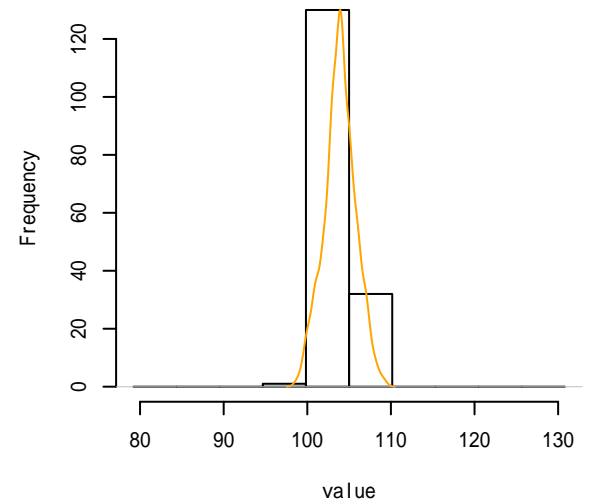



FEMALE Calcium Included

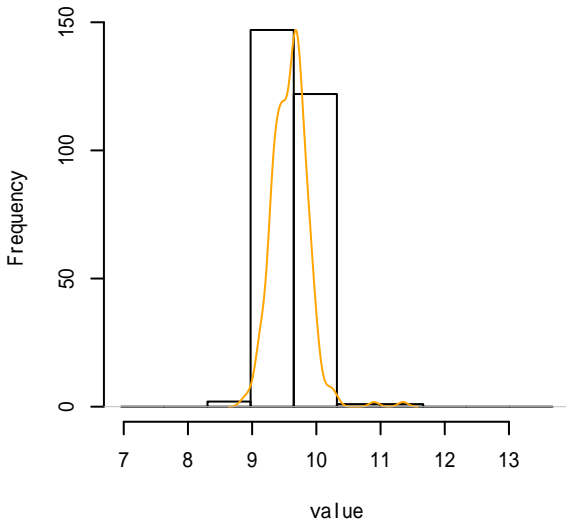

FEMALE Calcium Excluded by Med.  
p-val= 0.29297

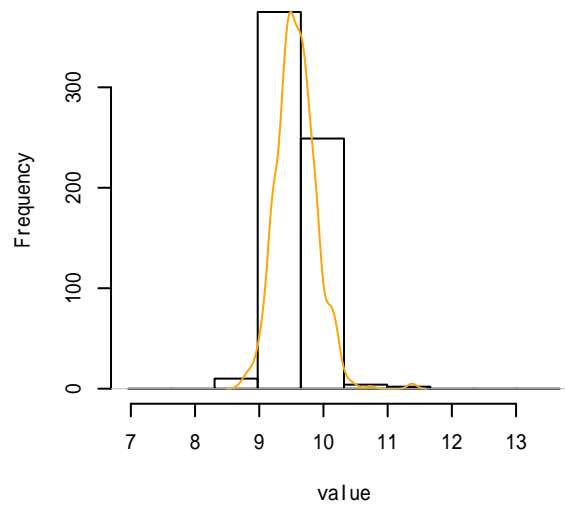

FEMALE Calcium Excluded by 1 visit  
pval= 0.09409

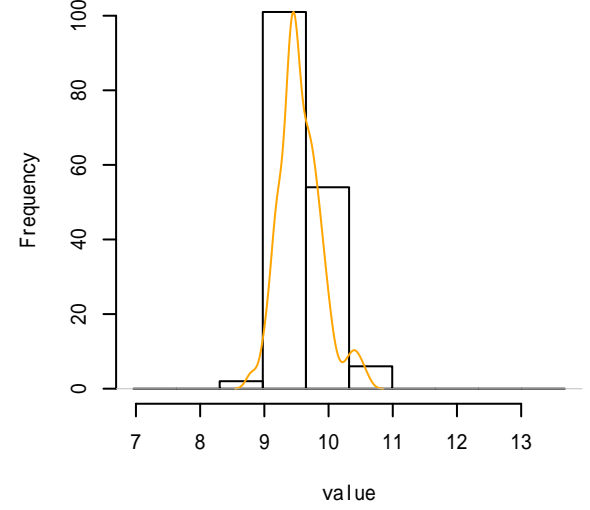

FEMALE InorganicPhosphorus Included

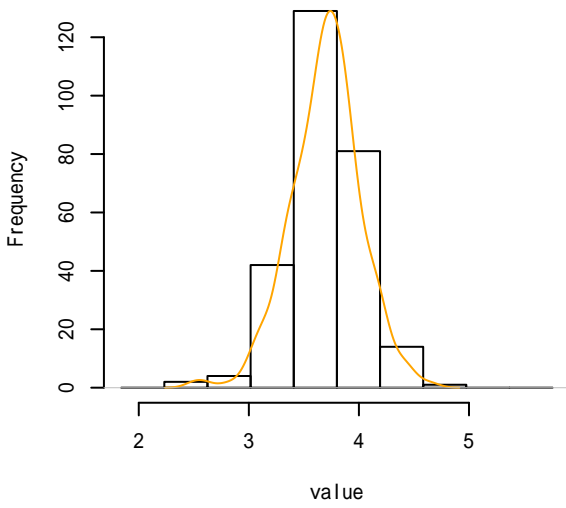

FEMALE InorganicPhosphorus Excluded by Med.  
p-val= 0.00026

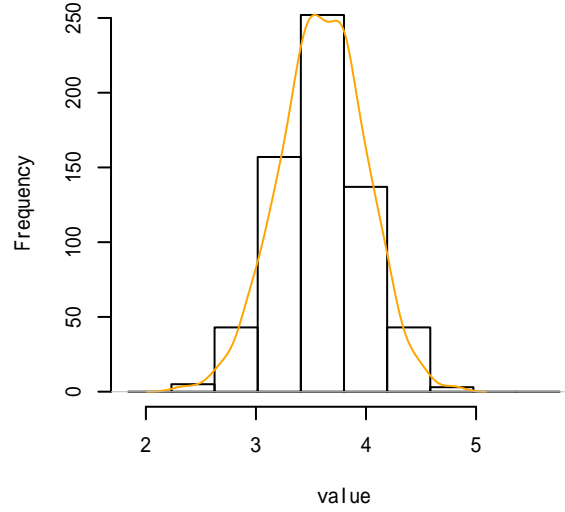

FEMALE InorganicPhosphorus Excluded by 1 visit  
pval= 0.32429

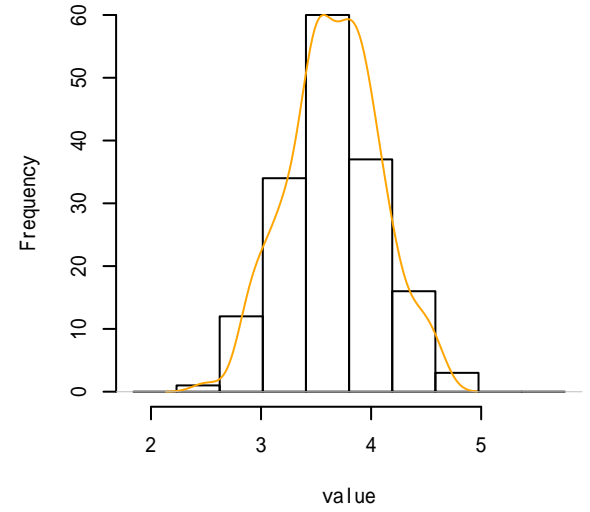

FEMALE SerumIron Included

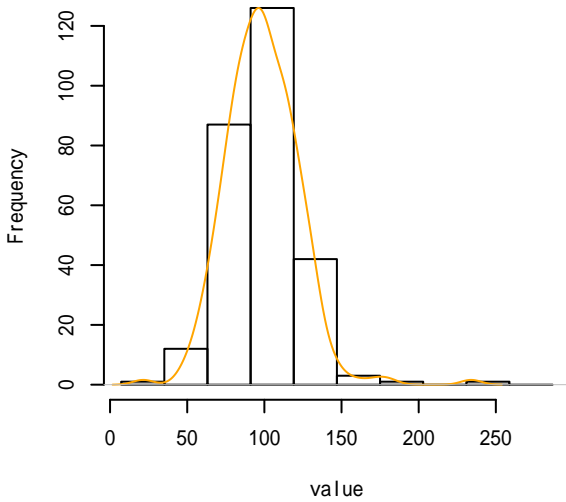

FEMALE SerumIron Excluded by Med.  
p-val= 0.21305

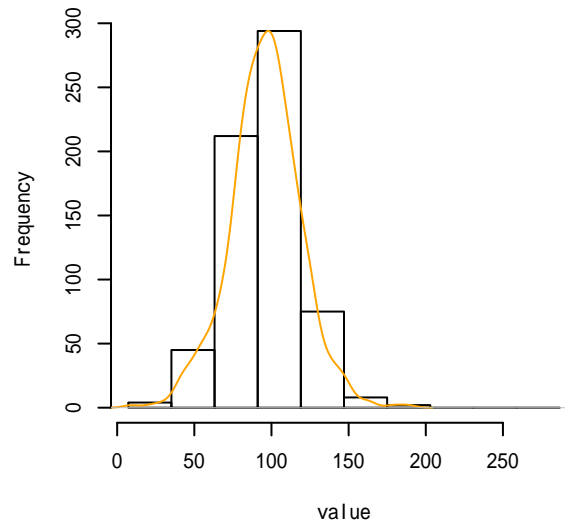

FEMALE SerumIron Excluded by 1 visit  
pval= 0.95521

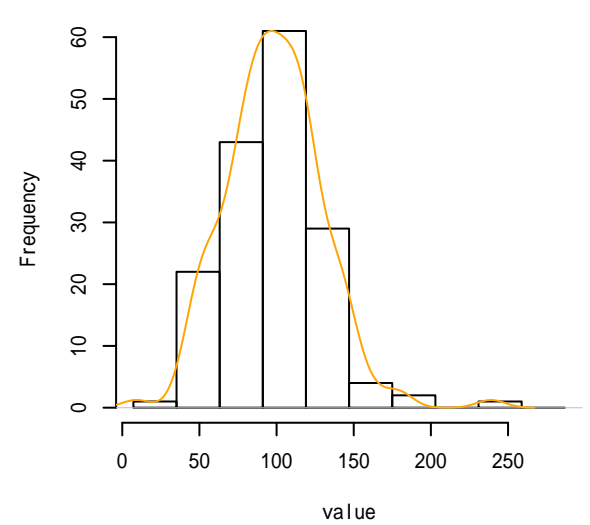

FEMALE C3 Included

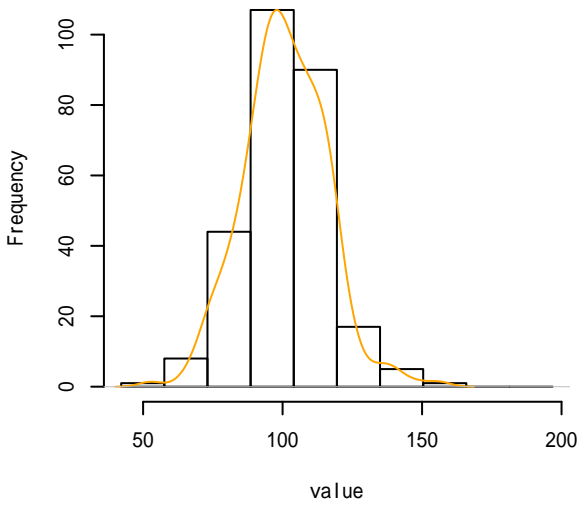

FEMALE C3 Excluded by Med.  
p-val= 0.00018

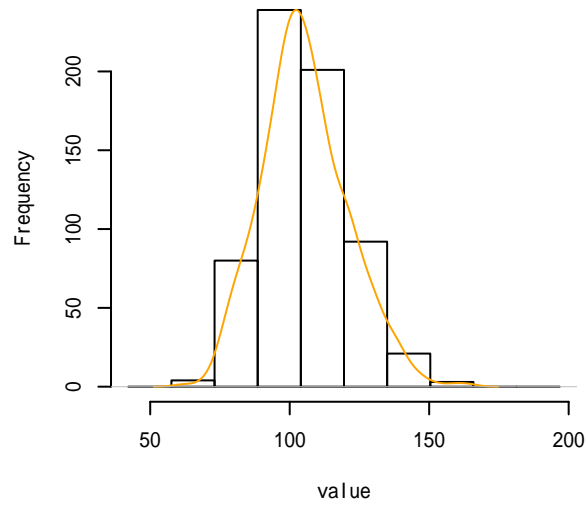

FEMALE C3 Excluded by 1 visit  
pval= 0.28623

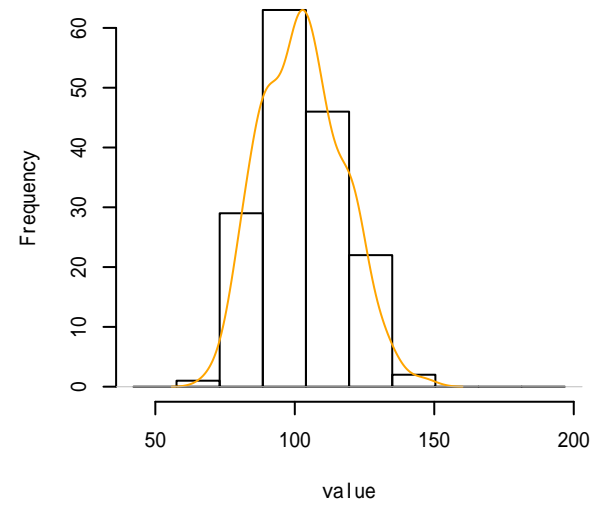

FEMALE C4 Included

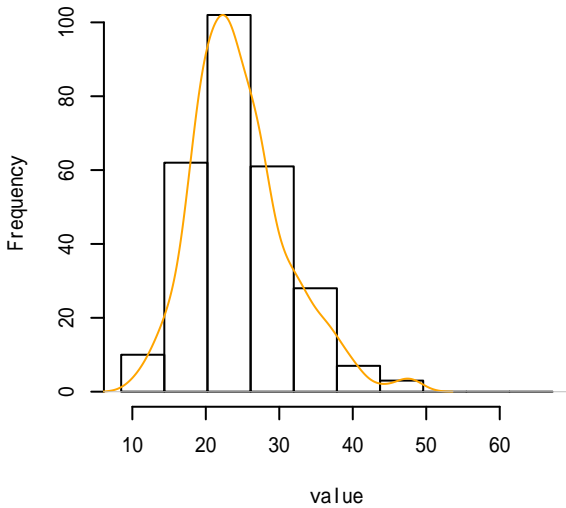

FEMALE C4 Excluded by Med.  
p-val= 0.02091

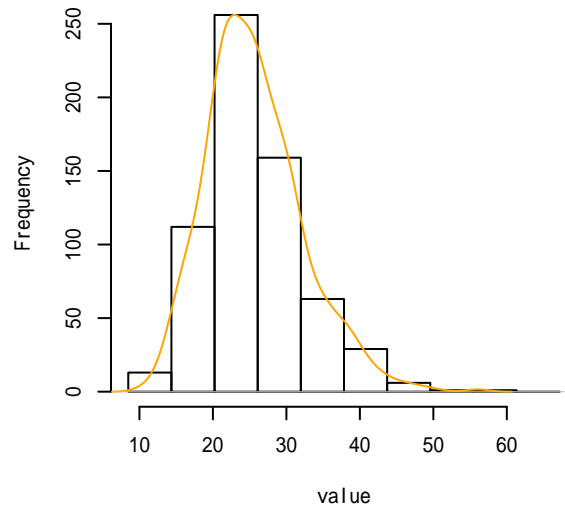

FEMALE C4 Excluded by 1 visit  
pval= 0.58338

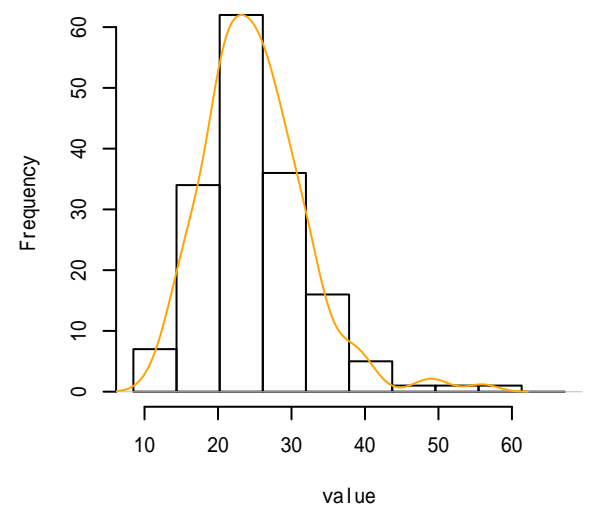

FEMALE nonHDL Included

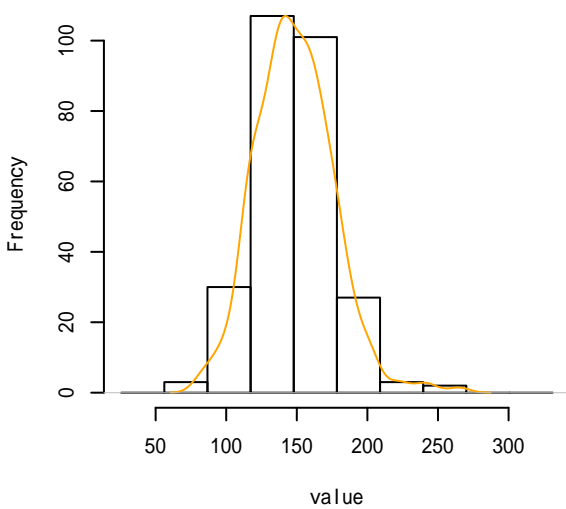

FEMALE nonHDL Excluded by Med.  
p-val= 0.0829

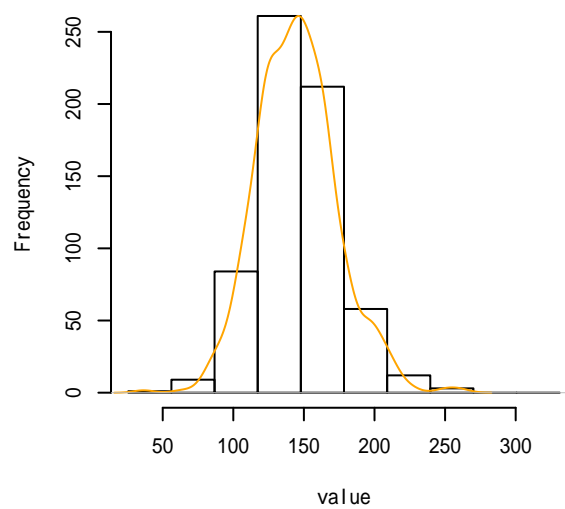

FEMALE nonHDL Excluded by 1 visit  
pval= 0.1729

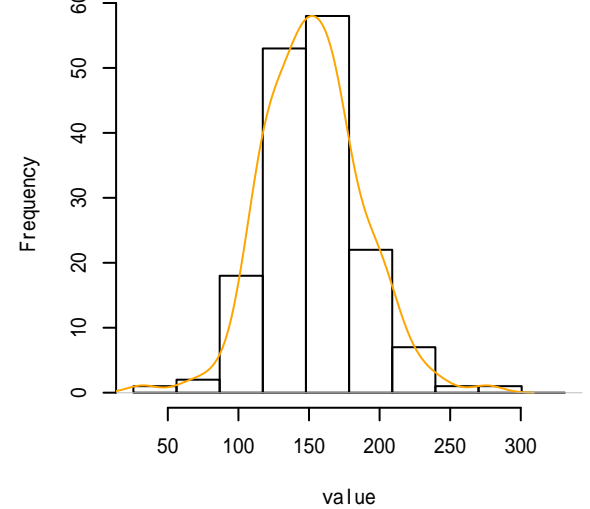

Supplement: pone.0230172.s002.pdf [file pone.0230172.s002.pdf]
