# Supplementary material for: Prediction of blood test values under different lifestyle scenarios using time-series electronic health record
Source: PubMed Central journal article supplement (PMC7083324; doi:10.1371/journal.pone.0230172), 2020-03-20

## MALE from 55 to 75

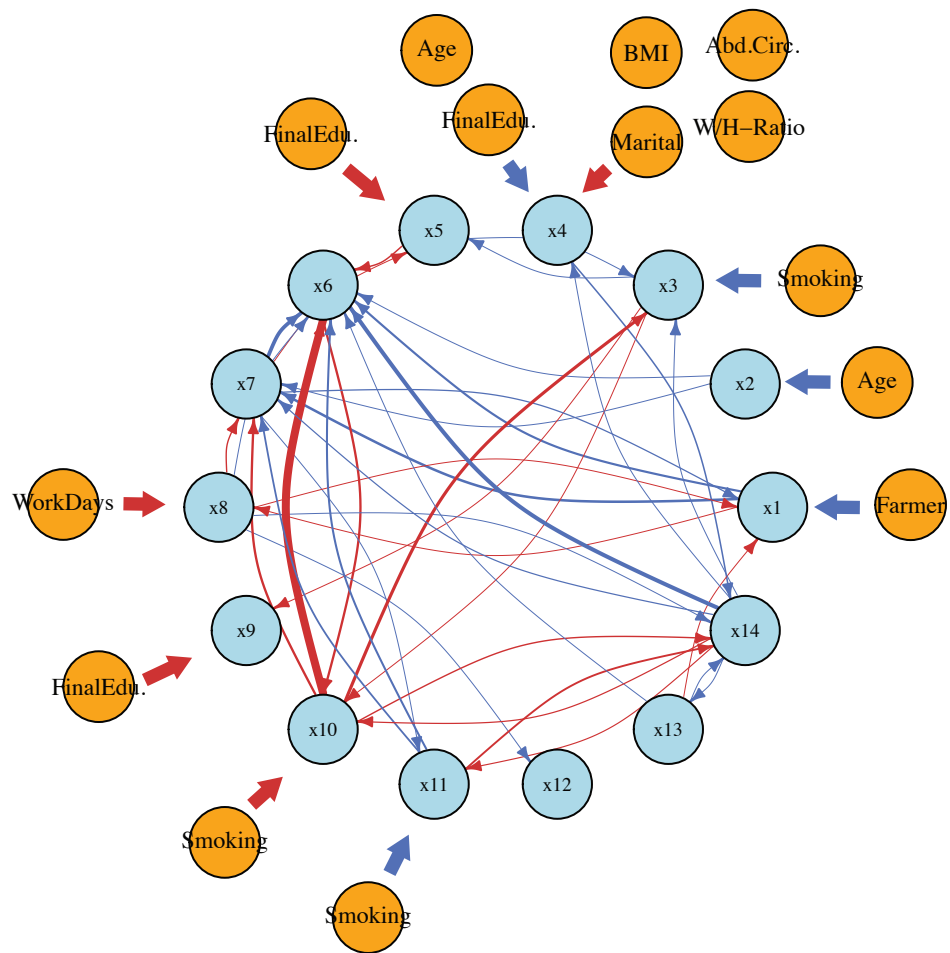

## FEMALE from 55 to 75

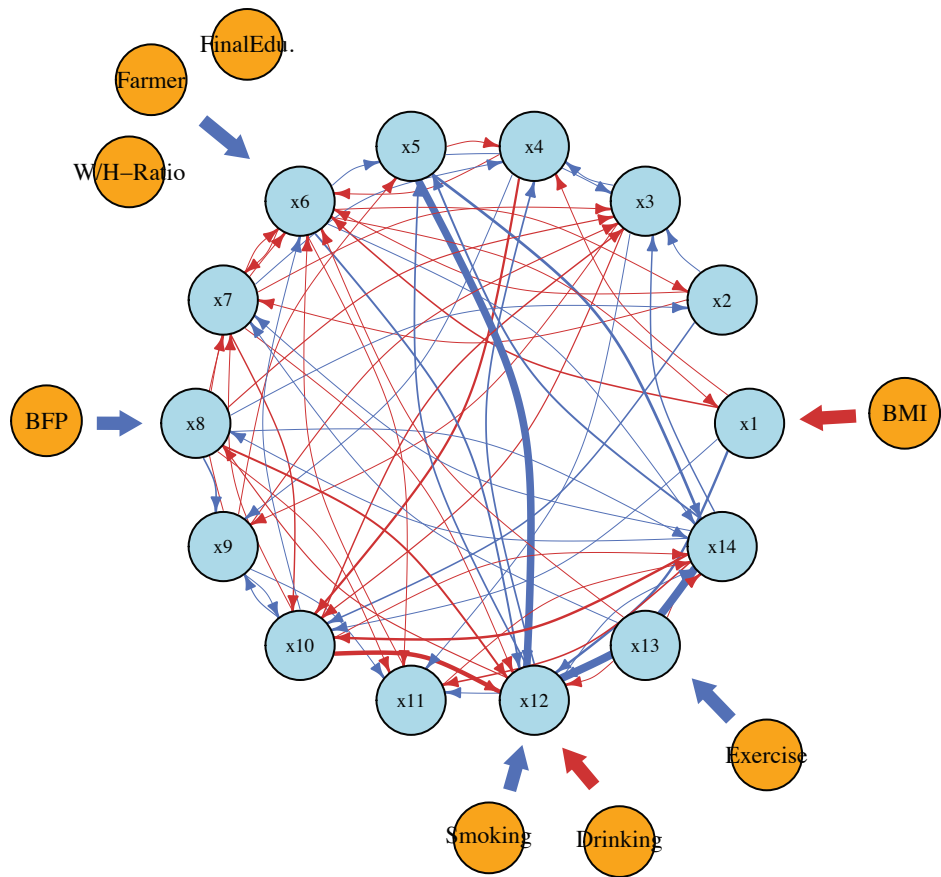

Supplement: pone.0230172.s004.pdf [file pone.0230172.s004.pdf]
